# Supplementary material for: Molecular Subclassification Based on Crosstalk Analysis Improves Prediction of Prognosis in Colorectal Cancer
Source: Front Genet. 2021 Nov 4;12:689676. doi: 10.3389/fgene.2021.689676 (PMC8600263; doi:10.3389/fgene.2021.689676)
Supplement: Supplementary file 11 [file Table10.XLSX]

## Sheet: Table S6-Reactome GSEA.gene_set
Table S10. Results of Reactome gene-set enrichment analysis (GSEA) analyses.
Term	ES	NES	P-value	FDR	Gene-size	Matched_size	Genes
REACTOME_3_UTR_MEDIATED_TRANSLATIONAL_REGULATION	0.746494	2.96189	0	0	176	98	RPL3L,RPS21,RPS5,RPS15,RPS4Y1,RPS28,RPL13,RPS16,RPS14,RPL36,RPL18A,RPS18,RPL35,RPLP2,RPS2,RPL18,RPLP1,RPS3,RPLP0,RPL29,UBA52,RPS6,RPL27,RPSA,RPS11,RPS8,RPS9,RPS19,RPL12,RPL7A,RPL9,FAU,RPL37A,RPL38,EIF3K,RPL32,RPS26,RPS4X,RPS13,RPL37,RPL34,RPS3A,RPL27A,RPL35A,RPL10A,RPS10,RPL13A,RPL31,EIF3G,RPL19,RPL3,RPL24,RPS12,RPS27A,EIF3F,RPL5,RPL11,RPS7,RPL36A,RPL10,EIF3I,RPL15,RPL26L1,RPL23A,RPL21,RPL23,RPL1…
REACTOME_BILE_ACID_AND_BILE_SALT_METABOLISM	0.714426	2.25147	0	0	27	25	ALB,CYP8B1,AKR1D1,SLCO1B1,BAAT,SLC10A1,AKR1C4,SLC27A5,CYP7A1,ABCB11,FABP6,ACOT8,ACOX2,SLCO1B3,CYP39A1,ABCC3,SLC27A2,HSD3B7,HSD17B4,AMACR,CYP27A1,SCP2,CH25H,SLC10A2,CYP7B1
REACTOME_LIPOPROTEIN_METABOLISM	0.75258	2.23664	0	0	28	24	ALB,APOA5,APOC3,APOA1,APOB,APOA2,AMN,SCARB1,SDC1,LDLRAP1,P4HB,LCAT,PLTP,SAR1B,MTTP,ABCG1,BMP1,LPL,APOE,LIPC,HSPG2,CETP,A2M,ABCA1
REACTOME_FORMATION_OF_THE_TERNARY_COMPLEX_AND_SUBSEQUENTLY_THE_43S_COMPLEX	0.739025	2.54054	0	0	74	47	RPS21,RPS5,RPS15,RPS4Y1,RPS28,RPS16,RPS14,RPS18,RPS2,RPS3,RPS6,RPSA,RPS11,RPS8,RPS9,RPS19,FAU,EIF3K,RPS26,RPS4X,RPS13,RPS3A,RPS10,EIF3G,RPS12,RPS27A,EIF3F,RPS7,EIF3I,RPS17,RPS24,EIF3D,RPS15A,RPS20,RPS23,EIF3B,RPS27,RPS25,EIF3H,EIF3E,EIF2S3,EIF2S2,EIF1AX,EIF3J,EIF2S1,EIF3C,EIF3A
REACTOME_MITOCHONDRIAL_PROTEIN_IMPORT	0.663053	2.27572	0	0	58	48	CYC1,SLC25A6,TIMM13,ATP5G1,TIMM8B,IDH3G,TIMM17B,TIMM10,TIMM50,TOMM7,TIMM44,PMPCA,GFER,PAM16,TOMM40,BCS1L,TAZ,SLC25A4,TIMM9,MTX1,TOMM5,ATP5B,LDHD,TOMM22,FXN,SAMM50,PMPCB,CHCHD4,HSCB,GRPEL1,DNAJC19,COX17,ACO2,ATP5A1,COQ2,TIMM8A,TOMM20,VDAC1,MTX2,CS,HSPA9,TIMM22,HSPD1,TIMM17A,GRPEL2,SLC25A12,SLC25A13,TIMM23B
REACTOME_COMPLEMENT_CASCADE	0.699041	2.22335	0	0	32	27	C9,CRP,C8B,C8A,CFHR3,C6,C4BPA,CFD,MASP2,C8G,C4BPB,CD46,C5,C2,CFB,CD55,CFI,C1QC,PROS1,C1QB,C1QA,C4A,C3,CFH,C1S,MASP1,C7
REACTOME_NONSENSE_MEDIATED_DECAY_ENHANCED_BY_THE_EXON_JUNCTION_COMPLEX	0.7131	2.72644	0	0	176	99	RPL3L,RPS21,RPS5,RPS15,RPS4Y1,RPS28,RPL13,RPS16,RPS14,RPL36,RPL18A,RPS18,RPL35,RPLP2,RPS2,RPL18,RPLP1,RPS3,RPLP0,RPL29,UBA52,RPS6,RPL27,RPSA,RPS11,RPS8,RPS9,RPS19,RPL12,RPL7A,RPL9,FAU,RPL37A,RPL38,RPL32,RPS26,RPS4X,RPS13,RPL37,RPL34,RPS3A,RPL27A,RPL35A,RPL10A,RPS10,RPL13A,RPL31,RPL19,RPL3,RPL24,RPS12,RPS27A,RPL5,RPL11,RPS7,RPL36A,RPL10,RPL15,RPL26L1,RPL23A,PPP2R1A,RPL21,RPL23,RPL14,RPS17,RPS24,RP…
REACTOME_PEPTIDE_CHAIN_ELONGATION	0.801992	3.02653	0	0	153	80	RPL3L,RPS21,RPS5,RPS15,RPS4Y1,RPS28,RPL13,RPS16,RPS14,RPL36,RPL18A,RPS18,RPL35,RPLP2,RPS2,RPL18,RPLP1,RPS3,RPLP0,RPL29,UBA52,RPS6,RPL27,RPSA,RPS11,RPS8,RPS9,RPS19,RPL12,RPL7A,RPL9,FAU,RPL37A,RPL38,RPL32,RPS26,RPS4X,RPS13,RPL37,RPL34,RPS3A,RPL27A,EEF2,RPL35A,RPL10A,RPS10,RPL13A,RPL31,RPL19,RPL3,RPL24,RPS12,RPS27A,RPL5,RPL11,RPS7,RPL36A,RPL10,RPL15,RPL26L1,RPL23A,RPL21,RPL23,RPL14,RPS17,RPS24,RPL41…
REACTOME_RESPIRATORY_ELECTRON_TRANSPORT	0.76078	2.96502	0	0	79	62	NDUFA7,NDUFB7,NDUFA13,CYC1,NDUFA3,UQCRQ,UQCRHL,NDUFS7,COX5B,COX7B,NDUFA11,COX4I1,UQCRC1,NDUFS6,NDUFA2,COX8A,COX6A1,NDUFB10,UQCR11,COX6B1,NDUFS5,COX5A,NDUFV1,ETFB,NDUFS3,NDUFB9,NDUFA6,UQCRH,NDUFAB1,NDUFA12,NDUFA8,NDUFA4,NDUFA1,NDUFA9,NDUFB2,NDUFB1,NDUFB8,COX6C,NDUFC1,NDUFB4,NDUFV3,UQCRFS1,NDUFS4,SDHB,COX7A2L,NDUFA10,NDUFB6,NDUFB5,UQCRC2,ETFA,NDUFS2,NDUFB3,SDHA,UQCRB,NDUFC2,CYCS,NDUFV2,SDHC,SDHD,ET…
REACTOME_RESPIRATORY_ELECTRON_TRANSPORT_ATP_SYNTHESIS_BY_CHEMIOSMOTIC_COUPLING_AND_HEAT_PRODUCTION_BY_UNCOUPLING_PROTEINS_	0.736634	2.64793	0	0	98	77	NDUFA7,ATP5D,NDUFB7,NDUFA13,CYC1,NDUFA3,UQCRQ,UQCRHL,NDUFS7,COX5B,ATP5G1,COX7B,NDUFA11,COX4I1,UQCRC1,NDUFS6,NDUFA2,COX8A,ATP5J2,COX6A1,NDUFB10,UQCR11,COX6B1,NDUFS5,COX5A,NDUFV1,ATP5I,ETFB,NDUFS3,NDUFB9,NDUFA6,UQCRH,NDUFAB1,NDUFA12,NDUFA8,NDUFA4,NDUFA1,NDUFA9,NDUFB2,NDUFB1,ATP5O,NDUFB8,COX6C,NDUFC1,ATP5C1,ATP5L,NDUFB4,ATP5E,ATP5H,ATP5B,NDUFV3,UQCRFS1,ATP5J,NDUFS4,SDHB,COX7A2L,ATP5F1,NDUFA10,NDUFB6…
REACTOME_ACTIVATION_OF_THE_MRNA_UPON_BINDING_OF_THE_CAP_BINDING_COMPLEX_AND_EIFS_AND_SUBSEQUENT_BINDING_TO_43S	0.693436	2.60653	0	0	84	53	RPS21,RPS5,RPS15,RPS4Y1,RPS28,RPS16,RPS14,RPS18,RPS2,EIF4EBP1,RPS3,RPS6,RPSA,RPS11,RPS8,RPS9,RPS19,FAU,EIF3K,RPS26,RPS4X,RPS13,RPS3A,RPS10,EIF3G,RPS12,RPS27A,EIF3F,RPS7,EIF3I,RPS17,RPS24,EIF3D,RPS15A,RPS20,RPS23,EIF3B,RPS27,RPS25,EIF3H,EIF3E,EIF2S3,EIF2S2,EIF1AX,EIF3J,EIF2S1,EIF4B,EIF4G1,EIF4H,EIF3C,EIF4E,EIF4A1,EIF3A
REACTOME_SRP_DEPENDENT_COTRANSLATIONAL_PROTEIN_TARGETING_TO_MEMBRANE	0.728355	3.58632	0	0	179	102	RPL3L,RPS21,RPS5,RPS15,RPS4Y1,RPS28,RPL13,RPS16,RPS14,RPL36,RPL18A,RPS18,RPL35,RPLP2,RPS2,RPL18,RPLP1,RPS3,RPLP0,RPL29,UBA52,RPS6,RPL27,RPSA,RPS11,RPS8,RPS9,RPS19,RPL12,SSR4,RPL7A,RPL9,FAU,RPL37A,RPL38,RPL32,RPS26,RPS4X,RPS13,RPL37,RPL34,RPS3A,RPL27A,RPL35A,RPL10A,RPS10,RPL13A,RPL31,RPL19,RPL3,RPL24,RPS12,RPS27A,RPL5,RPL11,RPS7,RPL36A,RPL10,RPL15,RPL26L1,RPL23A,RPL21,RPL23,RPL14,RPS17,RPS24,RPL41…
REACTOME_FORMATION_OF_FIBRIN_CLOT_CLOTTING_CASCADE	0.71721	2.36233	0	0	32	29	SERPINC1,FGG,FGA,FGB,F13B,F2,KNG1,KLKB1,F11,F7,PF4,F12,GP9,C1QBP,F10,PROC,PF4V1,PRCP,F3,PROS1,TFPI,THBD,VWF,F8,SERPING1,F5,A2M,GP1BA,F13A1
REACTOME_INFLUENZA_VIRAL_RNA_TRANSCRIPTION_AND_REPLICATION	0.775445	3.08047	0	0	169	95	RPL3L,RPS21,POLR2I,RPS5,RPS15,RPS4Y1,RPS28,RPL13,RPS16,RPS14,RPL36,POLR2L,RPL18A,RPS18,RPL35,RPLP2,RPS2,RPL18,RPLP1,RPS3,RPLP0,RPL29,UBA52,RPS6,RPL27,RPSA,RPS11,RPS8,RPS9,RPS19,RPL12,RPL7A,RPL9,FAU,RPL37A,RPL38,RPL32,POLR2J,POLR2G,RPS26,RPS4X,RPS13,RPL37,RPL34,RPS3A,RPL27A,POLR2H,RPL35A,RPL10A,RPS10,RPL13A,RPL31,RPL19,RPL3,RPL24,RPS12,RPS27A,RPL5,RPL11,RPS7,RPL36A,RPL10,RPL15,RPL26L1,RPL23A,RPL21…
REACTOME_SYNTHESIS_OF_BILE_ACIDS_AND_BILE_SALTS_VIA_7ALPHA_HYDROXYCHOLESTEROL	0.903431	2.66935	0	0	15	15	CYP8B1,AKR1D1,BAAT,AKR1C4,SLC27A5,CYP7A1,ABCB11,ACOT8,ACOX2,SLC27A2,HSD3B7,HSD17B4,AMACR,CYP27A1,SCP2
REACTOME_TRANSLATION	0.672182	2.6684	0	0	222	137	EEF1G,RPL3L,RPS21,RPS5,RPS15,RPS4Y1,RPS28,RPL13,RPS16,RPS14,RPL36,RPL18A,RPS18,RPL35,RPLP2,RPS2,RPL18,EIF4EBP1,RPLP1,RPS3,RPLP0,RPL29,UBA52,RPS6,RPL27,RPSA,RPS11,RPS8,RPS9,RPS19,RPL12,SSR4,RPL7A,RPL9,FAU,RPL37A,RPL38,EIF3K,RPL32,RPS26,EEF1B2,RPS4X,RPS13,RPL37,RPL34,RPS3A,RPL27A,EEF2,RPL35A,RPL10A,RPS10,RPL13A,RPL31,EIF3G,RPL19,RPL3,RPL24,RPS12,RPS27A,EIF3F,RPL5,RPL11,RPS7,RPL36A,RPL10,EIF3I,RPL15…
REACTOME_CYTOCHROME_P450_ARRANGED_BY_SUBSTRATE_TYPE	0.635512	2.15979	0	4.42683e-05	51	43	CYP8B1,CYP4A11,CYP2A6,CYP2C8,CYP1A2,CYP2E1,CYP4F8,CYP2C9,CYP17A1,CYP2C19,CYP3A4,CYP7A1,CYP2D6,CYP4F2,CYP2W1,CYP4F12,CYP2S1,CYP4F11,CYP2J2,CYP2B6,TBXAS1,CYP39A1,CYP2R1,CYP2C18,CYP51A1,CYP27B1,CYP4F3,CYP27A1,CYP3A5,CYP3A7,CYP2F1,POMC,CYP2U1,CYP11A1,CYP24A1,CYP4B1,CYP26A1,CYP1A1,CYP26B1,CYP19A1,PTGIS,CYP1B1,CYP7B1
REACTOME_SCF_BETA_TRCP_MEDIATED_DEGRADATION_OF_EMI1	0.530601	2.09339	0	0.000398414	51	47	PSMB3,UBA52,CDC20,PSMD3,PSMA7,PSMB10,RPS27A,PSMD8,PSMB4,PSMB5,PSMB8,PSMB1,PSMB7,PSMB6,PSMC3,PSMD4,PSMD13,PSMB9,PSMA5,PSMC4,PSMB2,PSME1,PSMC5,PSMF1,PSMD9,PSMD14,PSMA3,PSMD10,PSMA1,PSMA4,PSMC2,PSMA2,PSMD2,PSMD6,SKP1,PSMA6,PSMC6,CUL1,PSMD11,PSMD12,PSMD7,PSMD5,PSMD1,FBXO5,BTRC,PSMC1,PSME4
REACTOME_SYNTHESIS_OF_BILE_ACIDS_AND_BILE_SALTS	0.72088	2.05155	0	0.000531219	19	18	CYP8B1,AKR1D1,BAAT,AKR1C4,SLC27A5,CYP7A1,ABCB11,ACOT8,ACOX2,CYP39A1,SLC27A2,HSD3B7,HSD17B4,AMACR,CYP27A1,SCP2,CH25H,CYP7B1
REACTOME_TRANSPORT_OF_VITAMINS_NUCLEOSIDES_AND_RELATED_MOLECULES	0.617722	2.00508	0	0.000929634	31	26	ALB,SLC28A1,SLCO1B1,SLC28A2,SLC27A4,SLC29A2,SLC5A6,SLCO1B3,SLC35D2,SLCO4A1,SLC35A2,SLC35C1,SLC29A3,SLC35A1,SLC29A4,SLC29A1,SLC27A1,SLC35D1,SLC28A3,SLC33A1,SLC35A3,SLCO3A1,SLC35B4,SLCO2B1,SLCO2A1,SLCO4C1
REACTOME_SCFSKP2_MEDIATED_DEGRADATION_OF_P27_P21	0.526655	1.99955	0	0.000973902	56	51	PSMB3,UBA52,PSMD3,PSMA7,PSMB10,RPS27A,CCNE1,PSMD8,PSMB4,PSMB5,PSMB8,PSMB1,PSMB7,CKS1B,PSMB6,PSMC3,PSMD4,PSMD13,PSMB9,PSMA5,PSMC4,PSMB2,PSME1,CDKN1A,PSMC5,PSMF1,PSMD9,CCNA2,PSMD14,PSMA3,PSMD10,PSMA1,PSMA4,PSMC2,PSMA2,PSMD2,PSMD6,SKP1,PSMA6,PSMC6,CUL1,PSMD11,CDK2,PSMD12,PSMD7,SKP2,PSMD5,PSMD1,CDKN1B,PSMC1,CCNE2
REACTOME_CDK_MEDIATED_PHOSPHORYLATION_AND_REMOVAL_OF_CDC6	0.555612	1.95511	0	0.00141658	48	44	PSMB3,UBA52,PSMD3,PSMA7,PSMB10,RPS27A,PSMD8,PSMB4,PSMB5,PSMB8,PSMB1,PSMB7,PSMB6,PSMC3,PSMD4,PSMD13,PSMB9,PSMA5,PSMC4,PSMB2,PSME1,PSMC5,PSMF1,PSMD9,PSMD14,PSMA3,PSMD10,PSMA1,PSMA4,PSMC2,PSMA2,PSMD2,CDC6,PSMD6,PSMA6,PSMC6,PSMD11,CDK2,PSMD12,PSMD7,PSMD5,PSMD1,PSMC1,PSME4
REACTOME_RESPONSE_TO_ELEVATED_PLATELET_CYTOSOLIC_CA2_	0.450543	1.96254	0	0.00141658	89	76	HRG,ALB,FGG,FGA,FGB,APOA1,TF,KNG1,LEFTY2,PF4,ITGA2B,SERPINF2,CFD,SERPINA1,TUBA4A,EGF,ALDOA,PFN1,PPIA,SOD1,TMSB4X,CD9,CFL1,CD63,VEGFB,WDR1,CALM3,STX4,CALM2,ACTN4,CALM1,HABP4,VEGFA,CAP1,TIMP1,HSPA5,APP,PRKCG,LAMP2,PSAP,STXBP3,BRPF3,PDGFA,ACTN1,ABCC4,PRKCA,TGFB1,PROS1,CALU,VCL,PDGFB,ACTN2,VWF,F8,PECAM1,SERPING1,SPARC,SRGN,F5,VEGFC,A2M,THBS1,PPBP,SERPINE1,SCG3,PLEK,TGFB3,SELP,FN1,F13A1,TGFB2,PRKCB,CD…
REACTOME_PYRIMIDINE_METABOLISM	0.611313	1.93601	0	0.00177073	24	21	DPYS,AGXT2,UPB1,NT5C,TK1,CDA,DUT,UCK1,UPP1,DHODH,DCTD,UMPS,NT5M,TYMS,CAD,NT5E,DCK,TK2,TYMP,UPP2,DPYD
REACTOME_DESTABILIZATION_OF_MRNA_BY_AUF1_HNRNP_D0	0.543404	1.92994	0	0.00190354	53	47	PSMB3,UBA52,PSMD3,PSMA7,PSMB10,HSPB1,RPS27A,PSMD8,PSMB4,PSMB5,PSMB8,PSMB1,PSMB7,PSMB6,PSMC3,PSMD4,PSMD13,PSMB9,PSMA5,PSMC4,PSMB2,PSME1,PSMC5,PSMF1,PSMD9,PSMD14,PSMA3,PSMD10,PSMA1,PSMA4,PSMC2,PSMA2,PSMD2,HSPA8,PSMD6,PSMA6,PSMC6,HNRNPD,PSMD11,HSPA1B,PSMD12,PSMD7,PSMD5,PSMD1,EIF4G1,PSMC1,PSME4
REACTOME_PHASE1_FUNCTIONALIZATION_OF_COMPOUNDS	0.576097	1.89584	0	0.00230195	70	61	CYP8B1,CYP4A11,CYP2A6,ADH1A,CYP2C8,CYP1A2,CYP2E1,CYP4F8,ADH4,CYP2C9,CYP17A1,CYP2C19,CYP3A4,CYP7A1,CYP2D6,CYP4F2,CYP2W1,CYP4F12,CYP2S1,ADH6,CYP4F11,CYP2J2,ACSS2,CYP2B6,ALDH2,TBXAS1,SMOX,CYP39A1,ALDH1A1,ACSS1,CYP2R1,PAOX,CYP2C18,CYP51A1,MAOA,CYP27B1,CYP4F3,CYP27A1,CYP3A5,ADH1C,CYP3A7,CYP2F1,FMO3,POMC,CYP2U1,MAOB,ADH1B,CYP11A1,CYP24A1,PTGS1,CYP4B1,CYP26A1,PTGS2,CYP1A1,CYP26B1,CYP19A1,FMO1,PTGIS,CYP1…
REACTOME_REGULATION_OF_ORNITHINE_DECARBOXYLASE_ODC	0.539875	1.89481	0	0.00239049	49	46	OAZ3,PSMB3,PSMD3,PSMA7,PSMB10,PSMD8,PSMB4,PSMB5,PSMB8,PSMB1,PSMB7,PSMB6,PSMC3,OAZ1,PSMD4,ODC1,NQO1,PSMD13,PSMB9,PSMA5,PSMC4,PSMB2,PSME1,PSMC5,PSMF1,PSMD9,PSMD14,PSMA3,PSMD10,PSMA1,PSMA4,PSMC2,PSMA2,PSMD2,PSMD6,PSMA6,PSMC6,PSMD11,PSMD12,PSMD7,PSMD5,PSMD1,AZIN1,PSMC1,PSME4,OAZ2
REACTOME_ASSEMBLY_OF_THE_PRE_REPLICATIVE_COMPLEX	0.496136	1.85867	0	0.003489	65	61	PSMB3,UBA52,CDT1,PSMD3,E2F1,PSMA7,PSMB10,RPS27A,PSMD8,PSMB4,PSMB5,PSMB8,PSMB1,PSMB7,MCM5,PSMB6,PSMC3,PSMD4,MCM7,PSMD13,PSMB9,PSMA5,PSMC4,MCM2,PSMB2,PSME1,PSMC5,PSMF1,GMNN,ORC6,PSMD9,PSMD14,ORC5,PSMA3,ORC1,E2F2,PSMD10,PSMA1,PSMA4,PSMC2,PSMA2,PSMD2,MCM4,MCM3,CDC6,PSMD6,MCM6,PSMA6,ORC4,PSMC6,PSMD11,PSMD12,PSMD7,ORC3,PSMD5,PSMD1,ORC2,PSMC1,PSME4,E2F3,MCM8
REACTOME_LIPID_DIGESTION_MOBILIZATION_AND_TRANSPORT	0.54704	1.82276	0	0.00476978	46	41	ALB,APOA5,APOC3,APOA1,APOB,APOA2,AMN,CLPS,ABCG8,PPP1CA,SCARB1,SDC1,PNLIPRP2,ABCG5,LDLRAP1,P4HB,LCAT,PLTP,LIPE,SAR1B,MTTP,ABCG1,PPP1CC,PRKACA,MGLL,ABHD5,PPP1CB,PRKACB,BMP1,LPL,APOE,LIPC,PRKACG,CAV1,PNLIP,HSPG2,CETP,A2M,ABCA1,FABP4,PLIN1
REACTOME_APC_C_CDH1_MEDIATED_DEGRADATION_OF_CDC20_AND_OTHER_APC_C_CDH1_TARGETED_PROTEINS_IN_LATE_MITOSIS_EARLY_G1	0.493205	1.81738	0	0.005023	72	62	ANAPC11,PSMB3,UBA52,CDC20,PSMD3,AURKB,PSMA7,PSMB10,RPS27A,PSMD8,PSMB4,PTTG1,PSMB5,PSMB8,PSMB1,UBE2C,PSMB7,PLK1,PSMB6,PSMC3,PSMD4,PSMD13,PSMB9,PSMA5,ANAPC2,PSMC4,PSMB2,PSME1,ANAPC7,PSMC5,PSMF1,ANAPC5,PSMD9,PSMD14,PSMA3,CDC16,PSMD10,PSMA1,PSMA4,PSMC2,PSMA2,AURKA,PSMD2,PSMD6,PSMA6,PSMC6,UBE2E1,CDC23,ANAPC10,PSMD11,PSMD12,PSMD7,CDC26,SKP2,PSMD5,PSMD1,ANAPC4,PSMC1,PSME4,UBE2D1,CDC27,ANAPC1
REACTOME_GLUCOSE_TRANSPORT	0.546067	1.80815	0.0238095	0.00528737	38	36	G6PC,SLC2A2,GCKR,G6PC3,AAAS,SLC37A4,NUP85,NUP37,SLC2A1,RAE1,NUP93,NUP43,NUP88,NUP188,SEH1L,NUP62,NUP35,HK1,NUPL2,NUP107,NUP210,NUP54,NUP214,SLC2A4,NUP155,NUP133,NUP205,HK2,POM121,NUP50,TPR,NUP153,RANBP2,G6PC2,HK3,SLC2A3
REACTOME_PHASE_II_CONJUGATION	0.479922	1.80526	0	0.00541955	70	56	CYP1A2,GLYAT,UGT2B4,SULT2A1,UGT1A9,MAT1A,GSTA2,UGT1A1,AHCY,SULT2B1,GSTP1,GSTO2,SULT1A2,OPLAH,SULT1A1,MGST1,ACSM1,GSTA1,GSS,MGST2,GSTO1,GGT1,GSTM4,MGST3,NAT2,NAT1,GGCT,BPNT1,UGT1A8,TPMT,CNDP2,UGT2B10,GGT7,MAT2B,UGT1A6,MAT2A,PAPSS2,GSTA4,SULT1C2,GCLC,UGDH,SULT1B1,SLC35D1,PAPSS1,GSTM1,UGT2B17,UGP2,GCLM,UGT2B7,SULT4A1,MTR,NNMT,SULT1C4,GGT5,SULT1E1,GSTM5
REACTOME_VIF_MEDIATED_DEGRADATION_OF_APOBEC3G	0.490684	1.79957	0	0.0055958	52	45	PSMB3,UBA52,PSMD3,PSMA7,PSMB10,RPS27A,PSMD8,PSMB4,PSMB5,PSMB8,PSMB1,PSMB7,RBX1,PSMB6,PSMC3,PSMD4,PSMD13,PSMB9,PSMA5,PSMC4,PSMB2,PSME1,PSMC5,PSMF1,PSMD9,PSMD14,PSMA3,PSMD10,PSMA1,PSMA4,PSMC2,PSMA2,PSMD2,PSMD6,PSMA6,PSMC6,PSMD11,PSMD12,PSMD7,PSMD5,PSMD1,PSMC1,PSME4,APOBEC3G,CUL5
REACTOME_INTEGRIN_ALPHAIIB_BETA3_SIGNALING	0.549215	1.78765	0	0.00638891	27	26	FGG,FGA,FGB,ITGA2B,CSK,BCAR1,AKT1,SRC,SYK,RAPGEF3,GRB2,PTK2,PTPN1,CRK,SHC1,RAP1B,RAP1A,PDPK1,SOS1,RAPGEF4,VWF,APBB1IP,RASGRP2,FN1,RASGRP1,ITGB3
REACTOME_AUTODEGRADATION_OF_CDH1_BY_CDH1_APC_C	0.484371	1.76462	0	0.00786861	64	55	ANAPC11,PSMB3,UBA52,PSMD3,PSMA7,PSMB10,RPS27A,PSMD8,PSMB4,PSMB5,PSMB8,PSMB1,UBE2C,PSMB7,PSMB6,PSMC3,PSMD4,PSMD13,PSMB9,PSMA5,ANAPC2,PSMC4,PSMB2,PSME1,ANAPC7,PSMC5,PSMF1,ANAPC5,PSMD9,PSMD14,PSMA3,CDC16,PSMD10,PSMA1,PSMA4,PSMC2,PSMA2,PSMD2,PSMD6,PSMA6,PSMC6,UBE2E1,CDC23,ANAPC10,PSMD11,PSMD12,PSMD7,CDC26,PSMD5,PSMD1,ANAPC4,PSMC1,UBE2D1,CDC27,ANAPC1
REACTOME_PLATELET_AGGREGATION_PLUG_FORMATION	0.532724	1.73709	0	0.00945112	36	32	FGG,FGA,FGB,F2,ITGA2B,GP9,CSK,BCAR1,AKT1,SRC,SYK,RAPGEF3,GRB2,THPO,PTK2,PTPN1,CRK,SHC1,RAP1B,RAP1A,ADRA2A,PDPK1,ADRA2B,SOS1,RAPGEF4,VWF,APBB1IP,RASGRP2,FN1,GP1BA,RASGRP1,ITGB3
REACTOME_AUTODEGRADATION_OF_THE_E3_UBIQUITIN_LIGASE_COP1	0.497583	1.72979	0	0.00982385	51	45	PSMB3,UBA52,PSMD3,PSMA7,PSMB10,RPS27A,PSMD8,PSMB4,PSMB5,PSMB8,PSMB1,PSMB7,PSMB6,PSMC3,PSMD4,PSMD13,PSMB9,PSMA5,PSMC4,TP53,PSMB2,PSME1,PSMC5,PSMF1,PSMD9,PSMD14,PSMA3,PSMD10,PSMA1,PSMA4,PSMC2,PSMA2,PSMD2,RFWD2,PSMD6,PSMA6,PSMC6,PSMD11,PSMD12,PSMD7,PSMD5,PSMD1,PSMC1,PSME4,ATM
REACTOME_ER_PHAGOSOME_PATHWAY	0.468533	1.69915	0	0.0118851	61	56	PSMB3,UBA52,PSMD3,PSMA7,PSMB10,RPS27A,PSMD8,PSMB4,PSMB5,PSMB8,PSMB1,PSMB7,HLA-G,PSMB6,PSMC3,SEC61B,PSMD4,PSMD13,PSMB9,PSMA5,PSMC4,PSMB2,PSME1,PSMC5,PSMF1,SEC61G,HLA-A,PSMD9,HLA-F,PSMD14,PSMA3,PSMD10,PSMA1,PSMA4,CALR,PSMC2,PSMA2,PSMD2,PSMD6,SEC61A1,HLA-C,PSMA6,PSMC6,TAP1,HLA-B,PSMD11,PSMD12,PSMD7,PDIA3,PSMD5,PSMD1,SEC61A2,B2M,PSMC1,PSME4,TAP2
REACTOME_APC_C_CDC20_MEDIATED_DEGRADATION_OF_MITOTIC_PROTEINS	0.474423	1.69698	0	0.0120763	73	63	ANAPC11,PSMB3,UBA52,CDC20,PSMD3,PSMA7,PSMB10,RPS27A,PSMD8,PSMB4,PTTG1,PSMB5,PSMB8,PSMB1,UBE2C,CCNB1,PSMB7,PSMB6,PSMC3,PSMD4,PSMD13,PSMB9,PSMA5,ANAPC2,PSMC4,PSMB2,PSME1,ANAPC7,PSMC5,PSMF1,ANAPC5,MAD2L1,PSMD9,CDK1,PSMD14,PSMA3,CDC16,PSMD10,PSMA1,BUB3,PSMA4,PSMC2,PSMA2,PSMD2,PSMD6,PSMA6,PSMC6,UBE2E1,CDC23,ANAPC10,PSMD11,PSMD12,PSMD7,CDC26,PSMD5,PSMD1,BUB1B,ANAPC4,PSMC1,PSME4,UBE2D1,CDC27,ANAPC1
REACTOME_SYNTHESIS_OF_DNA	0.428789	1.69347	0	0.0122513	92	87	PSMB3,UBA52,CDT1,POLD2,PSMD3,PSMA7,PSMB10,POLD1,RPS27A,PSMD8,PSMB4,PSMB5,PSMB8,PSMB1,CDC45,PSMB7,MCM5,GINS2,RFC2,PSMB6,PSMC3,PSMD4,MCM7,PSMD13,PCNA,PSMB9,PSMA5,PSMC4,RPA3,MCM2,PSMB2,PSME1,CDKN1A,PSMC5,PSMF1,POLA2,ORC6,FEN1,PSMD9,RFC4,CCNA2,PSMD14,ORC5,PSMA3,ORC1,LIG1,GINS1,POLE2,POLD4,PSMD10,PSMA1,RPA2,PSMA4,PSMC2,PSMA2,POLE,PSMD2,MCM4,MCM3,PRIM1,CDC6,PSMD6,MCM6,PSMA6,RFC3,ORC4,PSMC6,RFC5,PSMD11,…
REACTOME_CDT1_ASSOCIATION_WITH_THE_CDC6_ORC_ORIGIN_COMPLEX	0.499694	1.69288	0	0.0122951	56	52	PSMB3,UBA52,CDT1,PSMD3,PSMA7,PSMB10,RPS27A,PSMD8,PSMB4,PSMB5,PSMB8,PSMB1,PSMB7,PSMB6,PSMC3,PSMD4,PSMD13,PSMB9,PSMA5,PSMC4,PSMB2,PSME1,PSMC5,PSMF1,GMNN,ORC6,PSMD9,PSMD14,ORC5,PSMA3,ORC1,PSMD10,PSMA1,PSMA4,PSMC2,PSMA2,PSMD2,CDC6,PSMD6,PSMA6,ORC4,PSMC6,PSMD11,PSMD12,PSMD7,ORC3,PSMD5,PSMD1,ORC2,PSMC1,PSME4,MCM8
REACTOME_ORC1_REMOVAL_FROM_CHROMATIN	0.466487	1.69013	0	0.0124701	67	62	PSMB3,UBA52,CDT1,PSMD3,PSMA7,PSMB10,RPS27A,PSMD8,PSMB4,PSMB5,PSMB8,PSMB1,PSMB7,MCM5,PSMB6,PSMC3,PSMD4,MCM7,PSMD13,PSMB9,PSMA5,PSMC4,MCM2,PSMB2,PSME1,CDKN1A,PSMC5,PSMF1,ORC6,PSMD9,CCNA2,PSMD14,ORC5,PSMA3,ORC1,PSMD10,PSMA1,PSMA4,PSMC2,PSMA2,PSMD2,MCM4,MCM3,CDC6,PSMD6,MCM6,PSMA6,ORC4,PSMC6,PSMD11,CDK2,PSMD12,PSMD7,ORC3,PSMD5,PSMD1,ORC2,CDKN1B,PSMC1,PSME4,MCM8,RB1
REACTOME_MRNA_SPLICING_MINOR_PATHWAY	0.505818	1.68469	0	0.0130827	45	38	POLR2I,POLR2L,SF3B5,LSM2,SNRPD2,POLR2J,SNRPF,POLR2G,SNRPB,POLR2H,POLR2E,SNRPG,SNRPE,TXNL4A,SNRPD1,POLR2C,SNRNP40,SF3B4,SRSF7,PRPF6,GTF2F1,SNRPD3,EFTUD2,GTF2F2,POLR2D,POLR2K,DDX23,SF3B3,SRSF6,NCBP2,SF3B2,NCBP1,SNRNP200,SRSF1,POLR2B,PRPF8,POLR2A,SF3B1
REACTOME_REGULATION_OF_MITOTIC_CELL_CYCLE	0.424333	1.58771	0	0.0254652	85	74	ANAPC11,PSMB3,UBA52,CDC20,PSMD3,AURKB,PSMA7,PSMB10,RPS27A,PSMD8,PSMB4,PTTG1,PSMB5,PSMB8,PSMB1,UBE2C,CCNB1,PSMB7,PLK1,PSMB6,PSMC3,PSMD4,PSMD13,PSMB9,PSMA5,ANAPC2,PSMC4,PSMB2,PSME1,ANAPC7,PSMC5,PSMF1,ANAPC5,MAD2L1,PSMD9,CCNA2,CDK1,PSMD14,PSMA3,CDC16,PSMD10,PSMA1,BUB3,PSMA4,PSMC2,PSMA2,AURKA,PSMD2,PSMD6,SKP1,PSMA6,PSMC6,CUL1,UBE2E1,CDC23,ANAPC10,PSMD11,CDK2,PSMD12,PSMD7,CDC26,SKP2,PSMD5,PSMD1,FBXO5,…
REACTOME_SULFUR_AMINO_ACID_METABOLISM	0.511035	1.57941	0.0350877	0.0271279	24	24	BHMT,MAT1A,SLC25A10,AHCY,ETHE1,TST,GOT1,SQRDL,ADI1,MRI1,ENOPH1,CTH,SUOX,APIP,CSAD,CNDP2,MAT2B,MAT2A,GCLC,GCLM,MTAP,CBS,CDO1,MTR
REACTOME_PPARA_ACTIVATES_GENE_EXPRESSION	0.39743	1.57701	0	0.0273467	104	99	CYP4A11,APOA5,APOA1,APOA2,SULT2A1,UGT1A9,CYP7A1,ANKRD1,TRIB3,MED16,TEAD4,ESRRA,MED27,MED18,FABP1,HMGCS2,SREBF1,MED19,FDFT1,MED11,MED30,PPARG,NPAS2,MED10,AGT,HDAC3,NR1D1,MED8,MED26,FHL2,MED31,RXRA,PEX11A,MED9,MED15,ME1,SREBF2,ALAS1,MED22,CDK8,CPT2,MED29,CPT1A,ABCB4,MED7,NRF1,MED4,PLIN2,SLC27A1,MED21,ACOX1,TEAD2,CCNC,MED20,MED6,TEAD3,TGS1,HMGCR,TNFRSF21,MED12,TBL1X,TXNRD1,MED17,NFYA,PPARA,PPARGC1B,…
REACTOME_P53_DEPENDENT_G1_DNA_DAMAGE_RESPONSE	0.444581	1.57101	0	0.0284843	57	51	PSMB3,UBA52,PSMD3,PSMA7,PSMB10,RPS27A,CCNE1,PSMD8,PSMB4,PSMB5,PSMB8,PSMB1,PSMB7,PSMB6,PSMC3,PSMD4,PSMD13,PSMB9,PSMA5,PSMC4,TP53,PSMB2,PSME1,CDKN1A,PSMC5,PSMF1,PSMD9,PSMD14,PSMA3,PSMD10,PSMA1,PSMA4,PSMC2,PSMA2,PSMD2,RFWD2,PSMD6,PSMA6,PSMC6,PSMD11,CDK2,PSMD12,PSMD7,PSMD5,PSMD1,CDKN1B,PSMC1,PSME4,MDM2,CCNE2,ATM
REACTOME_MITOCHONDRIAL_TRNA_AMINOACYLATION	0.555718	1.57022	0.0114943	0.0286593	21	19	CARS2,PPA2,SARS2,PARS2,FARS2,YARS2,VARS2,MARS2,WARS2,GARS,KARS,NARS2,AARS2,EARS2,HARS2,LARS2,RARS2,IARS2,DARS2
REACTOME_PTM_GAMMA_CARBOXYLATION_HYPUSINE_FORMATION_AND_ARYLSULFATASE_ACTIVATION	0.502616	1.56715	0.0131579	0.0289656	27	24	F2,ARSH,F7,PROZ,ARSE,DOHH,F10,DHPS,PROC,EIF5A,SUMF2,SUMF1,ARSA,VKORC1,FURIN,ARSK,GGCX,ARSG,EIF5A2,STS,ARSJ,PROS1,ARSB,ARSI
REACTOME_P53_INDEPENDENT_G1_S_DNA_DAMAGE_CHECKPOINT	0.470902	1.5481	0	0.0319847	51	46	PSMB3,UBA52,PSMD3,PSMA7,PSMB10,RPS27A,PSMD8,PSMB4,PSMB5,PSMB8,PSMB1,PSMB7,PSMB6,PSMC3,PSMD4,PSMD13,PSMB9,PSMA5,PSMC4,PSMB2,PSME1,PSMC5,PSMF1,CDC25A,CHEK2,PSMD9,PSMD14,PSMA3,PSMD10,PSMA1,PSMA4,PSMC2,PSMA2,PSMD2,PSMD6,PSMA6,PSMC6,PSMD11,PSMD12,CHEK1,PSMD7,PSMD5,PSMD1,PSMC1,PSME4,ATM
REACTOME_S_PHASE	0.384942	1.54606	0	0.0322472	109	103	PSMB3,UBA52,CDT1,POLD2,PSMD3,PSMA7,PSMB10,POLD1,RPS27A,CCNE1,PSMD8,PSMB4,PSMB5,PSMB8,PSMB1,CDC45,PSMB7,MCM5,GINS2,CKS1B,CDK4,RFC2,PSMB6,PSMC3,PSMD4,MCM7,PSMD13,PCNA,PSMB9,PSMA5,PSMC4,RPA3,MCM2,PSMB2,PSME1,CDC25B,CDKN1A,PSMC5,PSMF1,POLA2,ORC6,FEN1,CDC25A,PSMD9,CDK7,RFC4,CCNA2,PSMD14,ORC5,PSMA3,ORC1,LIG1,GINS1,POLE2,POLD4,PSMD10,MYC,PSMA1,RPA2,PSMA4,PSMC2,PSMA2,POLE,PSMD2,MCM4,CCNH,MCM3,PRIM1,CDC6,…
REACTOME_CYCLIN_E_ASSOCIATED_EVENTS_DURING_G1_S_TRANSITION_	0.45627	1.52576	0	0.0366665	65	60	PSMB3,UBA52,PKMYT1,PSMD3,PSMA7,PSMB10,RPS27A,CCNE1,PSMD8,PSMB4,PSMB5,PSMB8,PSMB1,PSMB7,CKS1B,PSMB6,PSMC3,PSMD4,PSMD13,PSMB9,PSMA5,PSMC4,PSMB2,PSME1,CDKN1A,PSMC5,PSMF1,CDC25A,PSMD9,CDK7,CCNA2,PSMD14,PSMA3,PSMD10,MYC,PSMA1,PSMA4,PSMC2,PSMA2,PSMD2,CCNH,PSMD6,SKP1,PSMA6,PSMC6,CUL1,PSMD11,CDK2,PSMD12,PSMD7,SKP2,MNAT1,MAX,PSMD5,PSMD1,CDKN1B,PSMC1,CCNE2,WEE1,RB1
REACTOME_BASE_EXCISION_REPAIR	0.52909	1.52358	0.0531915	0.0368872	19	19	NTHL1,CCNO,MPG,POLD2,POLD1,MUTYH,PCNA,APEX1,SMUG1,OGG1,FEN1,POLB,LIG1,XRCC1,POLD4,LIG3,POLD3,TDG,MBD4
REACTOME_METABOLISM_OF_NUCLEOTIDES	0.400914	1.51475	0	0.0390262	72	67	DPYS,AGXT2,UPB1,GUK1,NME1,GPX1,NT5C,NME4,APRT,TK1,GMPR,DTYMK,ADA,NME2,IMPDH2,ADSL,IMPDH1,CDA,TXN,ADK,DGUOK,AK1,AK2,GSR,DUT,ATIC,PNP,UCK1,UPP1,DHODH,NME1-NME2,HPRT1,GLRX,GMPR2,DCTD,PAICS,UMPS,NT5M,TYMS,CAT,RRM2,CAD,CTPS2,PFAS,AMPD2,GART,RRM1,NT5E,GMPS,ADSS,CMPK1,DCK,GDA,PPAT,TXNRD1,ADAL,TK2,XDH,TYMP,ADSSL1,NT5C2,AK5,RRM2B,AMPD3,UPP2,DPYD,AMPD1
REACTOME_MICRORNA_MIRNA_BIOGENESIS	0.525248	1.51359	0.049505	0.0392008	23	16	POLR2I,POLR2L,POLR2J,POLR2G,TARBP2,POLR2H,POLR2E,RAN,POLR2C,POLR2D,POLR2K,XPO5,DROSHA,POLR2B,POLR2A,DICER1
REACTOME_ABORTIVE_ELONGATION_OF_HIV1_TRANSCRIPT_IN_THE_ABSENCE_OF_TAT	0.543385	1.4953	0.0617284	0.0432042	23	18	POLR2I,POLR2L,POLR2J,POLR2G,POLR2H,POLR2E,SUPT4H1,POLR2C,GTF2F1,GTF2F2,POLR2D,POLR2K,SUPT5H,CTDP1,NCBP2,NCBP1,POLR2B,POLR2A
REACTOME_RESOLUTION_OF_AP_SITES_VIA_THE_MULTIPLE_NUCLEOTIDE_PATCH_REPLACEMENT_PATHWAY	0.553027	1.48022	0.0619469	0.0462529	17	17	NTHL1,CCNO,MPG,POLD2,POLD1,MUTYH,PCNA,APEX1,SMUG1,OGG1,FEN1,POLB,LIG1,POLD4,POLD3,TDG,MBD4
REACTOME_CITRIC_ACID_CYCLE_TCA_CYCLE	0.509363	1.42963	0.0618557	0.0618883	26	19	IDH3G,MDH2,IDH3B,IDH2,SUCLG1,FH,SDHB,SDHA,ACO2,DLST,CS,OGDH,SDHC,SDHD,SUCLG2,DLD,IDH3A,SUCLA2,NNT
REACTOME_SIGNALING_BY_WNT	0.383635	1.42558	0.0588235	0.0634997	65	60	PSMB3,UBA52,PSMD3,PSMA7,PSMB10,RPS27A,PSMD8,PSMB4,PSMB5,PSMB8,PSMB1,PPP2R1A,PSMB7,PSMB6,PSMC3,PSMD4,PSMD13,PSMB9,PSMA5,PSMC4,PSMB2,PSME1,PSMC5,AXIN1,PSMF1,FRAT2,FRAT1,PSMD9,PSMD14,PSMA3,PSMD10,PSMA1,PSMA4,PSMC2,PSMA2,PPP2R5D,PSMD2,PPP2CA,PSMD6,PPP2R5A,SKP1,PSMA6,PSMC6,CUL1,PSMD11,PSMD12,PSMD7,PPP2CB,PPP2R5B,PPP2R5C,CTNNB1,PSMD5,PSMD1,CSNK1A1,PPP2R1B,BTRC,PSMC1,PSME4,PPP2R5E,APC
REACTOME_TRNA_AMINOACYLATION	0.416949	1.39942	0.0588235	0.0735168	42	39	CARS2,FARSA,VARS,PPA2,PPA1,SARS,SARS2,FARSB,AIMP2,PARS2,FARS2,YARS2,VARS2,MARS2,YARS,WARS2,GARS,HARS,KARS,EEF1E1,NARS2,AARS,IARS,AARS2,EARS2,AIMP1,RARS,CARS,HARS2,LARS2,LARS,RARS2,DARS,IARS2,TARS,DARS2,EPRS,NARS,WARS
REACTOME_EXTENSION_OF_TELOMERES	0.437194	1.39395	0.0666667	0.0755638	27	26	RUVBL2,POLD2,POLD1,NHP2,RFC2,TERT,PCNA,RPA3,RUVBL1,WRAP53,POLA2,FEN1,RFC4,LIG1,POLE2,POLD4,RPA2,POLE,PRIM1,RFC3,RFC5,PRIM2,RPA1,DNA2,POLD3,POLA1
REACTOME_INFLUENZA_LIFE_CYCLE	0.654193			0.0870494	203	128	RPL3L,RPS21,POLR2I,RPS5,RPS15,RPS4Y1,RPS28,RPL13,RPS16,RPS14,RPL36,POLR2L,RPL18A,RPS18,RPL35,RPLP2,RPS2,RPL18,RPLP1,RPS3,RPLP0,RPL29,UBA52,RPS6,RPL27,RPSA,RPS11,RPS8,RPS9,RPS19,RPL12,RPL7A,RPL9,FAU,RPL37A,RPL38,RPL32,POLR2J,POLR2G,RPS26,RPS4X,RPS13,RPL37,RPL34,RPS3A,RPL27A,POLR2H,RPL35A,RPL10A,RPS10,RPL13A,RPL31,RPL19,RPL3,RPL24,RPS12,RPS27A,RPL5,RPL11,RPS7,CLTA,RPL36A,RPL10,RPL15,RPL26L1,RPL23A,…
REACTOME_TCA_CYCLE_AND_RESPIRATORY_ELECTRON_TRANSPORT	0.596527			0.0870494	141	112	NDUFA7,ATP5D,NDUFB7,NDUFA13,CYC1,NDUFA3,UQCRQ,UQCRHL,NDUFS7,COX5B,ATP5G1,COX7B,NDUFA11,COX4I1,UQCRC1,NDUFS6,IDH3G,NDUFA2,COX8A,ATP5J2,COX6A1,NDUFB10,UQCR11,COX6B1,NDUFS5,COX5A,D2HGDH,NDUFV1,ATP5I,ETFB,NDUFS3,NDUFB9,NDUFA6,UQCRH,MDH2,NDUFAB1,NDUFA12,NDUFA8,NDUFA4,NDUFA1,NDUFA9,NDUFB2,NDUFB1,ATP5O,IDH3B,NDUFB8,IDH2,COX6C,SUCLG1,NDUFC1,ATP5C1,ATP5L,PDHA1,NDUFB4,BSG,ATP5E,ATP5H,FH,ATP5B,NDUFV3,UQCRFS…
REACTOME_SLC_MEDIATED_TRANSMEMBRANE_TRANSPORT	0.239968			0.0870494	241	203	ALB,SLC22A7,G6PC,SLC2A2,SLC22A1,SLC28A1,GCKR,SLC13A5,SLCO1B1,SLC38A3,SLC5A2,SLC39A4,SLC25A10,SLC39A3,SLC38A5,SLC22A18,SLC2A8,SLC17A1,SLC30A2,SLC39A2,SLC7A9,RHCG,SLC18A1,SLC39A5,SLC28A2,G6PC3,SLC22A11,SLC1A7,SLC34A3,SLC1A5,SLC27A4,SLC7A5,SLC29A2,SLC43A1,SLC6A7,SLC5A6,SLC38A4,AAAS,SLC37A4,SLC3A2,SLCO1B3,SLC6A9,SLC13A2,NUP85,NUP37,SLC35D2,SLCO4A1,SLC35A2,SLC5A1,SLC6A20,SLC35C1,SLC40A1,SLC44A4,SLC3A1…
REACTOME_DNA_REPLICATION	0.205561			0.0870494	192	175	CENPM,PSMB3,UBA52,CDT1,SPC24,CDC20,POLD2,B9D2,PSMD3,AURKB,PMF1,BIRC5,E2F1,PSMA7,PSMB10,POLD1,RPS27A,PSMD8,PSMB4,PSMB5,PSMB8,PSMB1,CDC45,PPP2R1A,PSMB7,MCM5,PLK1,GINS2,SEC13,RFC2,PSMB6,PSMC3,PSMD4,MCM7,PSMD13,PCNA,PSMB9,PSMA5,PSMC4,CENPA,CDCA8,RPA3,MCM2,PSMB2,NUP85,PSME1,NUP37,CDKN1A,PSMC5,RPS27,CENPT,RANGAP1,PSMF1,GMNN,POLA2,CENPH,NUDC,ORC6,FEN1,MAD2L1,ZWINT,PSMD9,RFC4,CCNA2,PSMD14,ORC5,PSMA3,CENP…
REACTOME_INNATE_IMMUNE_SYSTEM	0.251341			0.0870494	279	207	C9,CRP,C8B,C8A,CFHR3,C6,LBP,SAA1,C4BPA,PRSS2,CFD,UBA52,PYCARD,MASP2,ECSIT,MAP2K2,SIGIRR,C8G,C4BPB,DEFB1,PIN1,RPS27A,UNC93B1,CARD9,LGALS3,PPP2R1A,NFKBIB,MAPK3,CASP1,TXN,MAPKAPK3,ISG15,RPS6KA1,DEFB4B,DDOST,CNPY3,FADD,PRKCSH,IRF3,TRAF2,DNM2,RNF135,MAP2K3,MAPK13,UBE2D2,PCBP2,IKBKE,OTUD5,CDK1,TAB1,UBE2N,IRF7,BCL2L1,NLRX1,DEFA6,PPP2R5D,TICAM1,AGER,RIPK3,ELK1,PPP2CA,MAPK7,ATG5,PELI3,CD46,DEFA5,C5,CASP9,…
REACTOME_FATTY_ACID_TRIACYLGLYCEROL_AND_KETONE_BODY_METABOLISM	0.282792			0.0870494	168	157	CYP4A11,APOA5,APOA1,APOA2,SULT2A1,UGT1A9,CYP7A1,ANKRD1,ECI1,AGPAT2,TRIB3,SLC25A1,MED16,TEAD4,PCCA,ACADS,ECHS1,BDH1,ESRRA,MED27,HADH,PCCB,HMGCL,MED18,FABP1,GPD1,HMGCS2,SREBF1,MED19,FDFT1,ACADL,LPCAT4,MED11,DGAT2,MED30,ACADVL,PPARG,NPAS2,ACAT1,FASN,MED10,AGT,HDAC3,NR1D1,MED8,MED26,FHL2,AGPAT5,MED31,RXRA,PEX11A,CPT1B,MED9,HADHA,SLC25A20,LPIN3,MED15,ME1,HSD17B12,SREBF2,ALAS1,DECR1,MED22,CDK8,CPT2,MCE…
REACTOME_METABOLISM_OF_RNA	0.479786			0.0870494	330	240	RPL3L,RPS21,RPS5,RPS15,RPS4Y1,RPS28,RPL13,RPS16,RPS14,RPL36,RPL18A,RPS18,RPL35,RPLP2,RPS2,RPL18,RPLP1,RPS3,RPLP0,PSMB3,RPL29,UBA52,RPS6,RPL27,RPSA,RPS11,RPS8,RPS9,RPS19,RPL12,LSM2,RPL7A,RPL9,SNRPD2,FAU,RPL37A,EXOSC5,RPL38,RPL32,SNRPF,RPS26,RPS4X,RPS13,RPL37,RPL34,RPS3A,RPL27A,SNRPB,LSM4,PSMD3,RPL35A,RPL10A,RPS10,RPL13A,RPL31,RPL19,RPL3,PSMA7,PSMB10,HSPB1,RPL24,RPS12,EXOSC7,RPS27A,PSMD8,RPL5,PSMB4…
REACTOME_METABOLISM_OF_PROTEINS	0.33061			0.0870494	518	403	F2,EEF1G,ARSH,RPL3L,F7,DPM3,RPS21,TUBA3C,RPS5,RPS15,RPS4Y1,RPS28,CYC1,RPL13,RPS16,RPS14,RPL36,SLC25A6,RPL18A,RPS18,RPL35,RPLP2,RPS2,TIMM13,RPL18,EIF4EBP1,PROZ,ATP5G1,RPLP1,TIMM8B,RPS3,MUCL1,RPLP0,RPL29,UBA52,IDH3G,TIMM17B,RPS6,RPL27,RPSA,RPS11,RPS8,RPS9,RPS19,FBXW5,TIMM10,RPL12,SSR4,RPL7A,RPL9,FAU,ARSE,RPL37A,TUBB4B,DOHH,RPL38,EIF3K,RPL32,RPS26,TUBA4A,PFDN5,EEF1B2,GPAA1,ALG3,RPS4X,RPS13,RPL37,RPL…
REACTOME_METABOLISM_OF_MRNA	0.526809			0.0870494	284	196	RPL3L,RPS21,RPS5,RPS15,RPS4Y1,RPS28,RPL13,RPS16,RPS14,RPL36,RPL18A,RPS18,RPL35,RPLP2,RPS2,RPL18,RPLP1,RPS3,RPLP0,PSMB3,RPL29,UBA52,RPS6,RPL27,RPSA,RPS11,RPS8,RPS9,RPS19,RPL12,LSM2,RPL7A,RPL9,FAU,RPL37A,EXOSC5,RPL38,RPL32,RPS26,RPS4X,RPS13,RPL37,RPL34,RPS3A,RPL27A,LSM4,PSMD3,RPL35A,RPL10A,RPS10,RPL13A,RPL31,RPL19,RPL3,PSMA7,PSMB10,HSPB1,RPL24,RPS12,EXOSC7,RPS27A,PSMD8,RPL5,PSMB4,RPL11,RPS7,RPL36A,…
REACTOME_METABOLISM_OF_AMINO_ACIDS_AND_DERIVATIVES	0.410546			0.0870494	200	182	HAO1,HPD,INHBC,AGXT2,FTCD,ARG1,AGXT,DAO,BHMT,INHBE,MAT1A,DIO1,UROC1,CGB8,OAZ3,AMDHD1,DIO3,CKB,SLC25A10,SRM,PSMB3,AHCY,ETHE1,SLC25A21,HSD17B10,PHGDH,TH,ALDH4A1,PCSK1,GSTZ1,HAAO,TST,CKMT1A,CKMT1B,ASL,ASS1,PSMD3,PYCR1,GRHPR,PSMA7,PCBD1,PSMB10,GPT,PSMD8,PSMB4,CKMT2,HAL,BCAT2,FAH,PSMB5,PSMB8,PSMB1,DDC,PRODH,AGMAT,PSAT1,PSMB7,GCDH,LHB,QDPR,ASNS,PSMB6,PSMC3,OAZ1,GOT1,PSMD4,HGD,ODC1,PAH,SLC6A8,NQO1,PSMD1…
REACTOME_HIV_INFECTION	0.141548			0.0870494	207	178	POLR2I,SLC25A6,POLR2L,PSMB3,UBA52,AP1S1,SLC25A5,POLR2J,POLR2G,TAF10,VPS28,AP2S1,POLR2H,AP1M2,PSMD3,HMGA1,PSMA7,PSMB10,RPS27A,PSMD8,PSMB4,PSMB5,PSMB8,PSMB1,PPIA,PSMB7,SLC25A4,POLR2E,ERCC2,RBX1,PSMB6,PSMC3,PSMD4,RAN,BANF1,PSMD13,AAAS,PSMB9,GTF2E2,PSMA5,RANBP1,PSMC4,TAF9,RCC1,SUPT4H1,PSMB2,NUP85,PSME1,NUP37,PSMC5,RANGAP1,PSMF1,POLR2C,GTF2F1,FEN1,GTF2H2,HLA-A,GTF2A2,VPS37B,VPS37D,PSMD9,AP2A1,CDK7,AP2…
REACTOME_HOST_INTERACTIONS_OF_HIV_FACTORS	0.151971			0.0870494	132	113	SLC25A6,PSMB3,UBA52,AP1S1,SLC25A5,AP2S1,AP1M2,PSMD3,HMGA1,PSMA7,PSMB10,RPS27A,PSMD8,PSMB4,PSMB5,PSMB8,PSMB1,PPIA,PSMB7,SLC25A4,RBX1,PSMB6,PSMC3,PSMD4,RAN,BANF1,PSMD13,AAAS,PSMB9,PSMA5,RANBP1,PSMC4,RCC1,PSMB2,NUP85,PSME1,NUP37,PSMC5,RANGAP1,PSMF1,HLA-A,PSMD9,AP2A1,AP2A2,PSMD14,PSMA3,AP1M1,RAE1,AP2M1,NPM1,PSMD10,PSMA1,AP1B1,PSMA4,PSMC2,PSMA2,NUP93,PSMD2,NUP43,NUP88,RAC1,NUP188,SEH1L,PSMD6,ATP6V1H,N…
REACTOME_PLATELET_ACTIVATION_SIGNALING_AND_AGGREGATION	0.279271			0.0870494	208	185	HRG,ALB,FGG,FGA,FGB,APOA1,TF,F2,KNG1,PIK3R2,LEFTY2,PF4,ITGA2B,SERPINF2,CFD,GP9,SERPINA1,TUBA4A,GNG13,GNB2,EGF,ALDOA,PFN1,PPIA,MAPK3,SOD1,DGKQ,TMSB4X,RHOG,CD9,GNG4,GNG5,PRKCZ,AKT2,CFL1,CSK,CD63,DAGLA,BCAR1,VEGFB,DAGLB,WDR1,AKT1,CALM3,SRC,STX4,PRKCD,GNA11,RAC1,CALM2,ACTN4,SYK,CALM1,DGKD,GNA15,GNB1,RAF1,ARRB1,RHOA,RHOB,MGLL,ITPR3,ARRB2,HABP4,VEGFA,RAPGEF3,DGKA,DGKG,CDC42,CAP1,TIMP1,MAPK14,HSPA5,VAV3…
REACTOME_MITOTIC_G1_G1_S_PHASES	0.248114			0.0870494	137	128	PSMB3,UBA52,CDT1,PKMYT1,PPP2R3B,PSMD3,E2F1,CDKN2A,PSMA7,PSMB10,MYBL2,RPS27A,CCNE1,PSMD8,PSMB4,PSMB5,PSMB8,PSMB1,CDC45,PPP2R1A,CCNB1,PSMB7,MCM5,CKS1B,CDK4,PSMB6,PSMC3,PSMD4,CDKN2D,MCM7,PSMD13,PCNA,PSMB9,PSMA5,PSMC4,RPA3,MCM2,PSMB2,PSME1,CDKN1A,PSMC5,E2F4,PSMF1,POLA2,ORC6,CDC25A,PSMD9,CDK7,CCNA2,CDK1,PSMD14,ORC5,PSMA3,HDAC1,ORC1,E2F2,POLE2,CCND3,PSMD10,MYC,PSMA1,RPA2,PSMA4,TYMS,PSMC2,PSMA2,TFDP1,PO…
REACTOME_METABOLISM_OF_LIPIDS_AND_LIPOPROTEINS	0.2859			0.0870494	478	435	ALB,CYP8B1,GC,CYP4A11,APOA5,APOC3,AKR1D1,APOA1,APOB,SRD5A2,APOA2,PIK3R2,SULT2A1,UGT1A9,SLCO1B1,CYP17A1,BAAT,PLA2G4D,ARSH,SLC10A1,AKR1C4,RBP2,SLC27A5,CYP7A1,ABCB11,PLA2G1B,ANKRD1,FABP6,DEGS2,AMN,CLPS,GAL3ST1,ECI1,EBP,AGPAT2,TRIB3,ARSE,SLC25A1,PCYT2,PEMT,PLA2G10,PTDSS2,MED16,NEU4,TEAD4,TM7SF2,MVD,SMPD2,PCCA,ACOT8,ACADS,ECHS1,ACOX2,PLA2G4F,BDH1,ESRRA,INPP5J,NSDHL,ABCG8,PPP1CA,TAZ,SCARB1,MVK,MED27,HA…
REACTOME_BIOLOGICAL_OXIDATIONS	0.510553			0.0870494	139	116	CYP8B1,CYP4A11,CYP2A6,ADH1A,CYP2C8,CYP1A2,CYP2E1,CYP4F8,GLYAT,UGT2B4,ADH4,CYP2C9,SULT2A1,UGT1A9,CYP17A1,MAT1A,GSTA2,CYP2C19,CYP3A4,CYP7A1,UGT1A1,AHCY,CYP2D6,SULT2B1,GSTP1,GSTO2,SULT1A2,OPLAH,CYP4F2,CYP2W1,SULT1A1,MGST1,ACSM1,GSTA1,GSS,MGST2,CYP4F12,GSTO1,GGT1,GSTM4,CYP2S1,MGST3,ADH6,NAT2,NAT1,CYP4F11,CYP2J2,ACSS2,GGCT,BPNT1,CYP2B6,ALDH2,TBXAS1,SMOX,CYP39A1,ALDH1A1,ACSS1,UGT1A8,TPMT,CYP2R1,PAOX,CY…
REACTOME_CELL_CYCLE_MITOTIC	0.155791			0.0870494	325	293	ANAPC11,CENPM,PSMB3,UBA52,CDT1,SSNA1,PKMYT1,PPP2R3B,TUBB4B,SPC24,DCTN3,TUBA4A,CDC20,POLD2,B9D2,PSMD3,AURKB,PMF1,BIRC5,E2F1,CDKN2A,PSMA7,PSMB10,MYBL2,POLD1,RPS27A,CCNE1,PSMD8,PSMB4,PTTG1,PSMB5,PSMB8,PSMB1,TUBG1,UBE2C,CDC45,PPP2R1A,CCNB1,PSMB7,MCM5,PLK1,GINS2,SEC13,CKS1B,CDK4,RFC2,PSMB6,PSMC3,PSMD4,CCNB2,CDC25C,CDKN2D,MCM7,PSMD13,PCNA,PSMB9,PSMA5,ANAPC2,PSMC4,CENPA,CDCA8,RPA3,MCM2,PSMB2,NUP85,PSME1…
REACTOME_CHOLESTEROL_BIOSYNTHESIS	0.449245	1.36042	0.0989011	0.0901104	24	20	EBP,TM7SF2,MVD,NSDHL,MVK,PMVK,DHCR7,FDFT1,FDPS,LSS,HSD17B7,MSMO1,DHCR24,CYP51A1,IDI1,GGPS1,HMGCR,SQLE,LBR,HMGCS1
REACTOME_LAGGING_STRAND_SYNTHESIS	0.433633	1.30282	0.145631	0.121425	19	19	POLD2,POLD1,RFC2,PCNA,RPA3,POLA2,FEN1,RFC4,LIG1,POLD4,RPA2,PRIM1,RFC3,RFC5,PRIM2,RPA1,DNA2,POLD3,POLA1
REACTOME_SYNTHESIS_AND_INTERCONVERSION_OF_NUCLEOTIDE_DI_AND_TRIPHOSPHATES	0.446525	1.29792	0.126214	0.123472	19	18	GUK1,NME1,NME4,DTYMK,NME2,TXN,AK1,AK2,GSR,NME1-NME2,GLRX,RRM2,CTPS2,RRM1,CMPK1,TXNRD1,AK5,RRM2B
REACTOME_DNA_STRAND_ELONGATION	0.417866	1.2973	0.12069	0.123602	30	30	POLD2,POLD1,CDC45,MCM5,GINS2,RFC2,MCM7,PCNA,RPA3,MCM2,POLA2,FEN1,RFC4,LIG1,GINS1,POLD4,RPA2,MCM4,MCM3,PRIM1,MCM6,RFC3,RFC5,PRIM2,RPA1,GINS4,DNA2,POLD3,POLA1,MCM8
REACTOME_FORMATION_OF_THE_HIV1_EARLY_ELONGATION_COMPLEX	0.413551	1.29339	0.1	0.125562	34	27	POLR2I,POLR2L,POLR2J,POLR2G,POLR2H,POLR2E,ERCC2,SUPT4H1,POLR2C,GTF2F1,GTF2H2,CDK7,GTF2F2,POLR2D,POLR2K,CCNH,SUPT5H,ERCC3,CTDP1,NCBP2,MNAT1,NCBP1,GTF2H3,GTF2H1,POLR2B,POLR2A,GTF2H4
REACTOME_PLATELET_SENSITIZATION_BY_LDL	0.437908	1.28899	0.12766	0.128437	16	16	APOB,PPP2R1A,PTPN6,PPP2R5D,PPP2CA,PPP2R5A,PPP2CB,PPP2R5B,PPP2R5C,LRP8,MAPK14,PPP2R1B,PLA2G4A,PPP2R5E,FGR,PECAM1
REACTOME_G1_S_TRANSITION	0.317749	1.27119	0	0.139935	112	104	PSMB3,UBA52,CDT1,PKMYT1,PPP2R3B,PSMD3,E2F1,PSMA7,PSMB10,RPS27A,CCNE1,PSMD8,PSMB4,PSMB5,PSMB8,PSMB1,CDC45,PPP2R1A,CCNB1,PSMB7,MCM5,CKS1B,PSMB6,PSMC3,PSMD4,MCM7,PSMD13,PCNA,PSMB9,PSMA5,PSMC4,RPA3,MCM2,PSMB2,PSME1,CDKN1A,PSMC5,PSMF1,POLA2,ORC6,CDC25A,PSMD9,CDK7,CCNA2,CDK1,PSMD14,ORC5,PSMA3,ORC1,POLE2,PSMD10,MYC,PSMA1,RPA2,PSMA4,TYMS,PSMC2,PSMA2,TFDP1,POLE,RRM2,PSMD2,MCM4,CCNH,MCM3,PPP2CA,PRIM1,CDC6,…
REACTOME_STEROID_HORMONES	0.415289	1.2687	0.148148	0.141764	29	24	GC,SRD5A2,CYP17A1,HSD3B1,LHB,HSD17B3,SRD5A3,STARD5,CYP2R1,CYP27B1,SRD5A1,LGMN,POMC,STARD4,HSD17B1,AKR1B1,CYP11A1,CYP24A1,HSD11B1,STAR,CYP19A1,HSD3B2,CGA,LRP2
REACTOME_ELONGATION_ARREST_AND_RECOVERY	0.412077	1.25287	0.175676	0.153349	32	22	POLR2I,POLR2L,POLR2J,POLR2G,POLR2H,POLR2E,SUPT4H1,POLR2C,GTF2F1,GTF2F2,POLR2D,POLR2K,SUPT5H,SSRP1,CTDP1,ELL,SUPT16H,POLR2B,TCEA1,POLR2A,CCNT1,CCNT2
REACTOME_CYTOSOLIC_TRNA_AMINOACYLATION	0.411186	1.23799	0.191781	0.16489	24	22	FARSA,VARS,PPA1,SARS,FARSB,AIMP2,YARS,GARS,HARS,KARS,EEF1E1,AARS,IARS,AIMP1,RARS,CARS,LARS,DARS,TARS,EPRS,NARS,WARS
REACTOME_G1_S_SPECIFIC_TRANSCRIPTION	0.43913	1.22915	0.158879	0.172555	19	16	CDT1,E2F1,CCNE1,CDC45,PCNA,CDC25A,CDK1,ORC1,TYMS,TFDP1,RRM2,CDC6,DHFR,FBXO5,POLA1,TK2
REACTOME_M_G1_TRANSITION	0.325345	1.22136	0.0588235	0.177738	81	76	PSMB3,UBA52,CDT1,PSMD3,E2F1,PSMA7,PSMB10,RPS27A,PSMD8,PSMB4,PSMB5,PSMB8,PSMB1,CDC45,PSMB7,MCM5,PSMB6,PSMC3,PSMD4,MCM7,PSMD13,PSMB9,PSMA5,PSMC4,RPA3,MCM2,PSMB2,PSME1,PSMC5,PSMF1,GMNN,POLA2,ORC6,PSMD9,PSMD14,ORC5,PSMA3,ORC1,E2F2,POLE2,PSMD10,PSMA1,RPA2,PSMA4,PSMC2,PSMA2,POLE,PSMD2,MCM4,MCM3,PRIM1,CDC6,PSMD6,MCM6,PSMA6,ORC4,PSMC6,PSMD11,DBF4,CDK2,PRIM2,PSMD12,PSMD7,ORC3,RPA1,MCM10,PSMD5,PSMD1,ORC2,C…
REACTOME_PROCESSIVE_SYNTHESIS_ON_THE_LAGGING_STRAND	0.433545	1.18913	0.225	0.208312	15	15	POLD2,POLD1,PCNA,RPA3,POLA2,FEN1,LIG1,POLD4,RPA2,PRIM1,PRIM2,RPA1,DNA2,POLD3,POLA1
REACTOME_TRANSCRIPTION_COUPLED_NER_TC_NER	0.363343	1.18387	0.142857	0.213321	45	42	POLR2I,POLR2L,POLR2J,POLR2G,POLD2,POLR2H,XAB2,POLD1,POLR2E,ERCC2,RFC2,PCNA,RPA3,POLR2C,ERCC1,GTF2H2,CDK7,RFC4,LIG1,POLE2,POLD4,RPA2,POLR2D,POLR2K,POLE,CCNH,RFC3,RFC5,ERCC3,ERCC5,MNAT1,ERCC8,RPA1,GTF2H3,GTF2H1,POLR2B,POLD3,TCEA1,POLR2A,GTF2H4,ERCC4,ERCC6
REACTOME_E2F_MEDIATED_REGULATION_OF_DNA_REPLICATION	0.354376	1.17205	0.204545	0.225167	35	32	CDT1,PPP2R3B,E2F1,CCNE1,CDC45,PPP2R1A,CCNB1,PCNA,POLA2,ORC6,CDC25A,CDK1,ORC5,ORC1,TYMS,TFDP1,RRM2,PPP2CA,PRIM1,CDC6,ORC4,DHFR,PRIM2,ORC3,PPP2CB,FBXO5,ORC2,PPP2R1B,POLA1,TK2,MCM8,RB1
REACTOME_APC_C_CDC20_MEDIATED_DEGRADATION_OF_CYCLIN_B	0.406911	1.16841	0.235955	0.228342	26	19	ANAPC11,UBA52,CDC20,RPS27A,UBE2C,CCNB1,ANAPC2,ANAPC7,ANAPC5,CDK1,CDC16,UBE2E1,CDC23,ANAPC10,CDC26,ANAPC4,UBE2D1,CDC27,ANAPC1
REACTOME_ACTIVATION_OF_ATR_IN_RESPONSE_TO_REPLICATION_STRESS	0.369261	1.16473	0.175	0.232109	38	34	CDC45,MCM5,RFC2,CDC25C,MCM7,RPA3,MCM2,RAD9A,ORC6,CDC25A,RFC4,ORC5,ORC1,RPA2,MCM4,MCM3,CDC6,MCM6,RFC3,ORC4,RFC5,DBF4,CDK2,HUS1,RAD1,CHEK1,ORC3,RPA1,MCM10,ORC2,CDC7,RAD17,MCM8,ATR
REACTOME_GLOBAL_GENOMIC_NER_GG_NER	0.330236	1.14741	0.22449	0.251227	35	32	POLD2,POLD1,ERCC2,RFC2,PCNA,RPA3,ERCC1,GTF2H2,DDB2,CDK7,RFC4,LIG1,POLE2,POLD4,RPA2,POLE,CCNH,RFC3,RFC5,ERCC3,XPA,ERCC5,RAD23B,DDB1,MNAT1,RPA1,GTF2H3,GTF2H1,POLD3,XPC,GTF2H4,ERCC4
REACTOME_FORMATION_OF_RNA_POL_II_ELONGATION_COMPLEX_	0.347576	1.14413	0.196429	0.254825	45	33	POLR2I,POLR2L,POLR2J,POLR2G,POLR2H,POLR2E,ERCC2,SUPT4H1,POLR2C,GTF2F1,GTF2H2,CDK7,GTF2F2,POLR2D,POLR2K,CCNH,SUPT5H,SSRP1,ERCC3,CTDP1,NCBP2,MNAT1,NCBP1,ELL,GTF2H3,GTF2H1,SUPT16H,POLR2B,TCEA1,POLR2A,CCNT1,CCNT2,GTF2H4
REACTOME_METABOLISM_OF_STEROID_HORMONES_AND_VITAMINS_A_AND_D	0.376491	1.13702	0.215686	0.262715	35	29	GC,SRD5A2,CYP17A1,RBP2,CLPS,HSD3B1,LHB,HSD17B3,SRD5A3,STARD5,CYP2R1,CYP27B1,SRD5A1,RDH11,LGMN,POMC,STARD4,HSD17B1,AKR1B1,CYP11A1,CYP24A1,PNLIP,HSD11B1,LRAT,STAR,CYP19A1,HSD3B2,CGA,LRP2
REACTOME_FORMATION_OF_TRANSCRIPTION_COUPLED_NER_TC_NER_REPAIR_COMPLEX	0.366292	1.13232	0.263158	0.268655	30	27	POLR2I,POLR2L,POLR2J,POLR2G,POLR2H,XAB2,POLR2E,ERCC2,POLR2C,ERCC1,GTF2H2,CDK7,POLR2D,POLR2K,CCNH,ERCC3,ERCC5,MNAT1,ERCC8,GTF2H3,GTF2H1,POLR2B,TCEA1,POLR2A,GTF2H4,ERCC4,ERCC6
REACTOME_TRANSPORT_OF_GLUCOSE_AND_OTHER_SUGARS_BILE_SALTS_AND_ORGANIC_ACIDS_METAL_IONS_AND_AMINE_COMPOUNDS	0.284114	1.13196	0.25	0.269045	89	76	SLC22A7,SLC2A2,SLC22A1,SLC13A5,SLC5A2,SLC39A4,SLC39A3,SLC22A18,SLC2A8,SLC30A2,SLC39A2,RHCG,SLC18A1,SLC39A5,SLC22A11,SLC6A7,SLC6A9,SLC13A2,SLC5A1,SLC6A20,SLC40A1,SLC44A4,SLC2A11,SLC44A3,SLC2A1,SLC22A5,RHAG,SLC39A1,SLC13A3,SLC39A8,SLC22A3,SLC6A19,HEPH,SLC44A2,SLC2A9,SLC39A7,SLC16A1,SLC31A1,SLC6A18,SLC2A4,SLC30A5,SLC44A1,SLC6A12,CP,SLC2A10,SLC44A5,SLC14A1,SLC22A15,SLC39A10,SLC22A4,SLC2A6,SLC5A11,SLC…
REACTOME_MRNA_CAPPING	0.365868	1.13033	0.279412	0.270866	30	27	POLR2I,POLR2L,POLR2J,POLR2G,POLR2H,POLR2E,ERCC2,POLR2C,GTF2F1,GTF2H2,CDK7,GTF2F2,POLR2D,POLR2K,CCNH,SUPT5H,ERCC3,NCBP2,MNAT1,NCBP1,GTF2H3,GTF2H1,POLR2B,POLR2A,RNMT,RNGTT,GTF2H4
REACTOME_AMINO_ACID_SYNTHESIS_AND_INTERCONVERSION_TRANSAMINATION	0.406972	1.11493	0.310345	0.290876	17	15	PHGDH,PYCR1,GPT,PSAT1,ASNS,GOT1,GOT2,PSPH,GPT2,GLUD1,ALDH18A1,OAT,GLS2,GLUL,GLS
REACTOME_CELL_CYCLE_CHECKPOINTS	0.326384	1.10569	0	0.303765	124	108	ANAPC11,PSMB3,UBA52,CDC20,PSMD3,PSMA7,PSMB10,RPS27A,CCNE1,PSMD8,PSMB4,PSMB5,PSMB8,PSMB1,UBE2C,CDC45,CCNB1,PSMB7,MCM5,RFC2,PSMB6,PSMC3,PSMD4,CCNB2,CDC25C,MCM7,PSMD13,PSMB9,PSMA5,ANAPC2,PSMC4,RPA3,TP53,MCM2,PSMB2,PSME1,ANAPC7,CDKN1A,PSMC5,PSMF1,RAD9A,ANAPC5,ORC6,CDC25A,MAD2L1,CHEK2,PSMD9,RFC4,CDK1,PSMD14,ORC5,PSMA3,CDC16,ORC1,MAD1L1,PSMD10,PSMA1,RPA2,BUB3,PSMA4,PSMC2,PSMA2,PSMD2,MCM4,RFWD2,MCM3,CDC…
REACTOME_RNA_POL_II_TRANSCRIPTION_PRE_INITIATION_AND_PROMOTER_OPENING	0.318188	1.08759	0.27907	0.328809	41	37	POLR2I,POLR2L,POLR2J,POLR2G,TAF10,POLR2H,POLR2E,ERCC2,GTF2E2,TAF9,POLR2C,GTF2F1,GTF2H2,GTF2A2,CDK7,GTF2F2,TAF12,POLR2D,POLR2K,CCNH,GTF2B,TBP,TAF11,TAF5,TAF6,ERCC3,MNAT1,GTF2E1,GTF2H3,GTF2H1,TAF13,POLR2B,POLR2A,TAF4B,GTF2H4,TAF1,GTF2A1
REACTOME_REGULATION_OF_APOPTOSIS	0.28985	1.08247	0.125	0.336897	58	52	PSMB3,UBA52,PSMD3,PSMA7,PSMB10,RPS27A,PSMD8,PSMB4,PSMB5,PSMB8,PSMB1,PSMB7,PSMB6,PSMC3,PSMD4,PSMD13,PSMB9,PSMA5,PSMC4,PSMB2,PSME1,PSMC5,PSMF1,DAPK2,PSMD9,PSMD14,PSMA3,PSMD10,PSMA1,PSMA4,PSMC2,PSMA2,PSMD2,PSMD6,PSMA6,CASP9,PSMC6,MAGED1,PSMD11,PSMD12,PSMD7,CASP3,PSMD5,PSMD1,PSMC1,PSME4,PAK2,APPL1,DAPK1,UNC5A,UNC5B,ARHGAP10
REACTOME_NUCLEOTIDE_EXCISION_REPAIR	0.32141	1.07928	0.310345	0.34066	51	47	POLR2I,POLR2L,POLR2J,POLR2G,POLD2,POLR2H,XAB2,POLD1,POLR2E,ERCC2,RFC2,PCNA,RPA3,POLR2C,ERCC1,GTF2H2,DDB2,CDK7,RFC4,LIG1,POLE2,POLD4,RPA2,POLR2D,POLR2K,POLE,CCNH,RFC3,RFC5,ERCC3,XPA,ERCC5,RAD23B,DDB1,MNAT1,ERCC8,RPA1,GTF2H3,GTF2H1,POLR2B,POLD3,TCEA1,POLR2A,XPC,GTF2H4,ERCC4,ERCC6
REACTOME_REGULATORY_RNA_PATHWAYS	0.367403	1.06399	0.378049	0.363065	26	19	POLR2I,POLR2L,POLR2J,POLR2G,TARBP2,POLR2H,POLR2E,RAN,POLR2C,POLR2D,POLR2K,XPO5,DROSHA,POLR2B,POLR2A,TNRC6C,TNRC6A,DICER1,TNRC6B
REACTOME_GLUCONEOGENESIS	0.330235	1.06253	0.34375	0.365141	34	29	SLC25A10,SLC25A1,GAPDH,PCK2,MDH2,ALDOA,TPI1,ALDOC,SLC25A11,GOT1,GPI,ALDOB,ENO3,PC,FBP1,ENO1,GOT2,PGK1,MDH1,PRKACA,PGAM1,SLC25A12,SLC25A13,PCK1,ENO2,PRKACB,PRKACG,PFKFB1,FBP2
REACTOME_GLYCOLYSIS	0.341344	1.05449	0.390244	0.376344	29	24	PKLR,GAPDH,ALDOA,TPI1,PFKL,PPP2R1A,ALDOC,GPI,ALDOB,ENO3,ENO1,PFKP,PGK1,PFKM,PPP2R5D,PPP2CA,PFKFB4,PGAM1,PFKFB2,PPP2CB,PPP2R1B,ENO2,PFKFB3,PFKFB1
REACTOME_LATE_PHASE_OF_HIV_LIFE_CYCLE	0.288594	1.04861	0.5	0.385514	104	89	POLR2I,POLR2L,UBA52,POLR2J,POLR2G,TAF10,VPS28,POLR2H,RPS27A,POLR2E,ERCC2,RAN,AAAS,GTF2E2,RANBP1,TAF9,RCC1,SUPT4H1,NUP85,NUP37,RANGAP1,POLR2C,GTF2F1,GTF2H2,GTF2A2,VPS37B,VPS37D,CDK7,RAE1,GTF2F2,TAF12,POLR2D,POLR2K,TSG101,NUP93,NUP43,NUP88,CCNH,NUP188,SEH1L,SUPT5H,GTF2B,SSRP1,NUP62,NUP35,TBP,TAF11,TAF5,TAF6,VPS37C,NMT1,ERCC3,NUPL2,CTDP1,NCBP2,NUP107,NUP210,NUP54,MNAT1,NUP214,NCBP1,ELL,NUP155,GTF2E1…
REACTOME_RNA_POL_II_PRE_TRANSCRIPTION_EVENTS	0.293495	1.04477	0.416667	0.39079	61	48	POLR2I,POLR2L,POLR2J,POLR2G,TAF10,POLR2H,POLR2E,ERCC2,GTF2E2,TAF9,SUPT4H1,POLR2C,GTF2F1,GTF2H2,GTF2A2,CDK7,GTF2F2,TAF12,POLR2D,POLR2K,CCNH,SUPT5H,GTF2B,SSRP1,TBP,TAF11,TAF5,TAF6,ERCC3,CTDP1,NCBP2,MNAT1,NCBP1,ELL,GTF2E1,GTF2H3,GTF2H1,SUPT16H,TAF13,POLR2B,TCEA1,POLR2A,TAF4B,CCNT1,CCNT2,GTF2H4,TAF1,GTF2A1
REACTOME_APC_CDC20_MEDIATED_DEGRADATION_OF_NEK2A	0.357606	1.04175	0.430108	0.394988	28	21	ANAPC11,UBA52,CDC20,RPS27A,UBE2C,ANAPC2,ANAPC7,ANAPC5,MAD2L1,NEK2,CDC16,BUB3,UBE2E1,CDC23,ANAPC10,CDC26,BUB1B,ANAPC4,UBE2D1,CDC27,ANAPC1
REACTOME_REGULATION_OF_GLUCOKINASE_BY_GLUCOKINASE_REGULATORY_PROTEIN	0.346897	1.04028	0.425	0.397621	27	25	GCKR,AAAS,NUP85,NUP37,RAE1,NUP93,NUP43,NUP88,NUP188,SEH1L,NUP62,NUP35,NUPL2,NUP107,NUP210,NUP54,NUP214,NUP155,NUP133,NUP205,POM121,NUP50,TPR,NUP153,RANBP2
REACTOME_ENDOSOMAL_SORTING_COMPLEX_REQUIRED_FOR_TRANSPORT_ESCRT	0.332711	1.01979	0.492063	0.431281	27	26	UBA52,VPS28,RPS27A,CHMP2A,VPS25,SNF8,HGS,VPS37B,CHMP4C,VPS37D,CHMP6,CHMP4B,VPS4A,TSG101,CHMP5,VPS37C,CHMP4A,CHMP7,VTA1,CHMP3,STAM,VPS37A,CHMP2B,VPS36,STAM2,VPS4B
REACTOME_PROCESSING_OF_CAPPED_INTRONLESS_PRE_MRNA	0.324668	1.01951	0.460526	0.431626	23	22	SNRPF,SNRPB,LSM10,SNRPG,SNRPE,SLBP,SNRPD3,PABPN1,CSTF1,CPSF3,CLP1,CSTF2,NCBP2,ZNF473,CSTF3,NCBP1,CPSF7,NUDT21,CPSF2,LSM11,PAPOLA,PCF11
REACTOME_AMYLOIDS	-0.619893	-1.427	0.00101523	0.441254	83	72	APCS,FGA,APOA1,TTR,CALCA,SAA1,NPPA,CST3,H2AFX,H2AFZ,TGFBI,SEMG1,HIST1H4I,HIST1H2AC,ODAM,ITM2B,APP,B2M,HIST1H2BD,LYZ,HIST1H2BK,H3F3A,GSN,HIST1H3E,HIST2H3C,HIST1H4J,HIST2H2BE,MFGE8,INS,LTF,HIST1H2BH,HIST1H3H,HSPG2,HIST1H2AE,HIST2H4A,HIST3H2BB,HIST1H3D,HIST1H2BJ,HIST1H3G,HIST2H2AC,SNCA,HIST1H4H,HIST4H4,HIST1H2BN,HIST1H4K,HIST1H2BG,HIST1H2BC,HIST1H2AD,HIST1H2BE,HIST2H3D,HIST1H4F,HIST1H2BL,HIST1H4A,HI…
REACTOME_PEROXISOMAL_LIPID_METABOLISM	0.343159	1.0035	0.48	0.459417	21	20	ACOT8,ACOX2,ACAA1,CRAT,PHYH,ACOX3,SLC27A2,HACL1,SLC25A17,IDH1,ABCD1,HSD17B4,GNPAT,AMACR,FAR2,ACOX1,CROT,SCP2,AGPS,FAR1
REACTOME_IMMUNOREGULATORY_INTERACTIONS_BETWEEN_A_LYMPHOID_AND_A_NON_LYMPHOID_CELL	-0.619971	-1.42319	0.00306122	0.470067	70	54	IFITM1,HLA-G,ULBP1,CD81,HLA-A,HLA-F,ULBP3,HLA-C,ULBP2,PVR,HLA-B,ICAM2,CDH1,B2M,CD3D,CXADR,CD8B,RAET1E,HCST,CD40,ITGB7,TYROBP,KIR2DL4,KLRC1,CD3E,CD247,CD8A,ITGB1,ICAM1,CD40LG,CD34,CD3G,ITGB2,ITGAL,C3,LILRB2,CRTAM,ICAM3,CD96,FCGR3A,LILRB4,SELL,LILRB1,CD19,VCAM1,LILRB5,KLRK1,FCGR2B,LILRB3,KLRD1,CD160,CD200R1,LILRA1,CD226
REACTOME_MITOTIC_PROMETAPHASE	0.256162	0.99327	0.25	0.478189	87	76	CENPM,SPC24,CDC20,B9D2,AURKB,PMF1,BIRC5,PPP2R1A,PLK1,SEC13,CENPA,CDCA8,NUP85,NUP37,RPS27,CENPT,RANGAP1,CENPH,NUDC,MAD2L1,ZWINT,CENPN,KIF2C,ITGB3BP,SPC25,MAD1L1,NUF2,BUB3,PPP2R5D,SKA1,NUP43,PPP2CA,SEH1L,PPP2R5A,CENPO,RCC2,CENPK,SKA2,DSN1,CENPP,PPP1CC,CENPL,NUP107,NSL1,NDC80,INCENP,BUB1,PPP2CB,CENPQ,ERCC6L,PPP2R5B,PPP2R5C,KIF18A,BUB1B,ZW10,PPP2R1B,NUP133,MIS12,CKAP5,MAPRE1,NDEL1,ZWILCH,CENPI,SMC1A,…
REACTOME_METABOLISM_OF_NON_CODING_RNA	0.288992	0.989804	0.538462	0.483713	49	47	SNRPD2,SNRPF,SNRPB,GEMIN7,SNRPG,WDR77,AAAS,NUP85,GEMIN6,NUP37,SNRPE,SNRPD1,GEMIN2,CLNS1A,SNRPD3,PRMT5,RAE1,SNUPN,GEMIN4,NUP93,SMN1,NUP43,NUP88,NUP188,SEH1L,NUP62,NUP35,NUPL2,NCBP2,NUP107,NUP210,SMN2,NUP54,NUP214,NCBP1,DDX20,TGS1,NUP155,GEMIN5,NUP133,NUP205,PHAX,POM121,NUP50,TPR,NUP153,RANBP2
REACTOME_FORMATION_OF_INCISION_COMPLEX_IN_GG_NER	0.330036	0.984791	0.511628	0.492559	23	20	ERCC2,RPA3,ERCC1,GTF2H2,DDB2,CDK7,RPA2,CCNH,ERCC3,XPA,ERCC5,RAD23B,DDB1,MNAT1,RPA1,GTF2H3,GTF2H1,XPC,GTF2H4,ERCC4
REACTOME_G0_AND_EARLY_G1	0.324012	0.967793	0.5	0.523415	25	22	E2F1,MYBL2,CCNE1,PCNA,E2F4,CDC25A,CCNA2,CDK1,HDAC1,TFDP1,CDC6,LIN37,E2F5,CDK2,RBBP4,LIN9,LIN52,CCNE2,DYRK1A,RBL1,LIN54,RBL2
REACTOME_REGULATION_OF_MRNA_STABILITY_BY_PROTEINS_THAT_BIND_AU_RICH_ELEMENTS	0.274411	0.961132	0.333333	0.536059	84	76	PSMB3,UBA52,EXOSC5,PSMD3,PSMA7,PSMB10,HSPB1,EXOSC7,RPS27A,PSMD8,PSMB4,PSMB5,PSMB8,PSMB1,PSMB7,PSMB6,PSMC3,PSMD4,PSMD13,PSMB9,PSMA5,EXOSC1,PSMC4,PSMB2,PSME1,EXOSC2,PSMC5,EXOSC8,PSMF1,EXOSC3,PSMD9,PSMD14,PSMA3,AKT1,ELAVL1,PSMD10,PSMA1,PSMA4,EXOSC6,PSMC2,PSMA2,PRKCD,PSMD2,HSPA8,PSMD6,PSMA6,PSMC6,HNRNPD,EXOSC9,MAPKAPK2,PSMD11,HSPA1B,PSMD12,PSMD7,NUP214,PSMD5,PSMD1,PARN,YWHAB,EIF4G1,MAPK14,TNFSF13,ANP…
REACTOME_INHIBITION_OF_THE_PROTEOLYTIC_ACTIVITY_OF_APC_C_REQUIRED_FOR_THE_ONSET_OF_ANAPHASE_BY_MITOTIC_SPINDLE_CHECKPOINT_COMPONENTS	0.336563	0.95793	0.48913	0.541582	24	18	ANAPC11,CDC20,UBE2C,ANAPC2,ANAPC7,ANAPC5,MAD2L1,CDC16,BUB3,UBE2E1,CDC23,ANAPC10,CDC26,BUB1B,ANAPC4,UBE2D1,CDC27,ANAPC1
REACTOME_RNA_POL_III_CHAIN_ELONGATION	0.341012	0.946361	0.547619	0.560484	17	16	POLR2L,POLR2H,POLR3K,POLR1C,POLR2E,POLR1D,POLR3H,POLR3E,POLR3C,POLR2K,POLR3B,POLR3D,POLR3F,POLR3A,POLR3GL,LZTS1
REACTOME_TRANSFERRIN_ENDOCYTOSIS_AND_RECYCLING	0.303531	0.940972	0.651515	0.569546	25	24	TF,ATP6V0B,ATP6V1F,ATP6V0D1,TCIRG1,ATP6V0A4,ATP6V0E1,STEAP3,MCOLN1,ATP6V1G1,ATP6V1E1,ATP6V1H,ATP6V1E2,ATP6V1D,TFRC,ATP6V1C2,ATP6V0C,ATP6V0A2,ATP6V1B1,ATP6V1B2,ATP6V1A,ATP6V1C1,ATP6V0D2,ATP6V1G2
REACTOME_PHOSPHORYLATION_OF_THE_APC_C	0.336546	0.938405	0.584906	0.573603	23	17	ANAPC11,UBE2C,CCNB1,PLK1,ANAPC2,ANAPC7,ANAPC5,CDK1,CDC16,UBE2E1,CDC23,ANAPC10,CDC26,ANAPC4,UBE2D1,CDC27,ANAPC1
REACTOME_DEADENYLATION_OF_MRNA	0.355384	0.937861	0.561404	0.574379	22	15	EIF4A3,CNOT3,CNOT10,CNOT7,CNOT8,EIF4B,PAIP1,PARN,EIF4G1,EIF4E,CNOT2,TNKS1BP1,CNOT4,EIF4A1,CNOT6
REACTOME_TRANSPORT_OF_MATURE_MRNA_DERIVED_FROM_AN_INTRONLESS_TRANSCRIPT	0.288744	0.932853	0.615385	0.583226	33	30	AAAS,NUP85,NUP37,RAE1,CPSF3,NUP93,NUP43,NUP88,NUP188,SEH1L,NUP62,NUP35,NUPL2,NCBP2,NUP107,NXF1,NUP210,NUP54,NUP214,NCBP1,NUP155,EIF4E,NUP133,NUP205,CPSF2,POM121,NUP50,TPR,NUP153,RANBP2
REACTOME_INTERACTIONS_OF_VPR_WITH_HOST_CELLULAR_PROTEINS	0.288759	0.927839	0.625	0.591684	33	31	SLC25A6,SLC25A5,HMGA1,SLC25A4,BANF1,AAAS,NUP85,NUP37,RAE1,NUP93,NUP43,NUP88,NUP188,SEH1L,NUP62,NUP35,NUPL2,NUP107,NUP210,NUP54,NUP214,NUP155,NUP133,NUP205,POM121,NUP50,KPNA1,TPR,NUP153,PSIP1,RANBP2
REACTOME_TRANS_GOLGI_NETWORK_VESICLE_BUDDING	0.25019	0.926192	0.6	0.594101	60	56	SH3GL2,AP1S1,BLOC1S1,AP1M2,CLTA,TPD52L1,VAMP8,FTH1,DNM2,FTL,SNAPIN,BLOC1S3,GAK,NAPA,DTNBP1,HIP1R,AP4B1,AP1M1,AP1B1,STX4,HSPA8,SNX5,RAB5C,DNASE2,ARRB1,NECAP1,CTSZ,OCRL,M6PR,TFRC,TPD52,YIPF6,AP3S1,TXNDC5,GBF1,SNX2,SH3D19,PUM1,SNAP23,CLTC,SNX9,VAMP2,VAMP7,SORT1,AP3B1,TGOLN2,AP1G1,IGF2R,TBC1D8B,CPD,GNS,PICALM,DNAJC6,AP1S2,AP4E1,PIK3C2A
REACTOME_GLUCOSE_METABOLISM	0.255907	0.92356	0.736842	0.597683	69	61	GYS2,SLC25A10,SLC25A1,PKLR,GAPDH,PCK2,MDH2,ALDOA,TPI1,PFKL,PPP2R1A,ALDOC,SLC25A11,GOT1,GPI,ALDOB,ENO3,PC,PYGB,FBP1,ENO1,PHKG2,GOT2,GYS1,PFKP,PGK1,MDH1,PFKM,GYG1,GYG2,CALM3,PHKA1,PGM1,PPP2R5D,PHKA2,CALM2,PPP2CA,CALM1,PYGL,PFKFB4,PRKACA,PGAM1,SLC25A12,PFKFB2,SLC25A13,PPP2CB,PCK1,PPP2R1B,PGM2,PHKB,UGP2,ENO2,GBE1,PRKACB,AGL,PHKG1,PFKFB3,PRKACG,PFKFB1,FBP2,PYGM
REACTOME_TRANSPORT_OF_RIBONUCLEOPROTEINS_INTO_THE_HOST_NUCLEUS	0.288686	0.921479	0.61194	0.601868	27	26	AAAS,NUP85,NUP37,RAE1,NUP93,NUP43,NUP88,NUP188,SEH1L,NUP62,NUP35,NUPL2,NUP107,NUP210,NUP54,NUP214,NUP155,KPNB1,NUP133,NUP205,POM121,NUP50,KPNA1,TPR,NUP153,RANBP2
REACTOME_ANTIGEN_PRESENTATION_FOLDING_ASSEMBLY_AND_PEPTIDE_LOADING_OF_CLASS_I_MHC	0.306819	0.92036	0.571429	0.602647	21	20	SEC13,HLA-G,HLA-A,HLA-F,CALR,HLA-C,TAP1,HLA-B,SAR1B,PDIA3,HSPA5,B2M,SEC24B,SEC24C,CANX,TAP2,ERAP1,SEC31A,SEC24D,SEC23A
REACTOME_GLUTATHIONE_CONJUGATION	0.312619	0.903028	0.569767	0.632054	23	21	GSTA2,GSTP1,GSTO2,OPLAH,MGST1,GSTA1,GSS,MGST2,GSTO1,GGT1,GSTM4,MGST3,GGCT,CNDP2,GGT7,GSTA4,GCLC,GSTM1,GCLM,GGT5,GSTM5
REACTOME_PROCESSING_OF_CAPPED_INTRON_CONTAINING_PRE_MRNA	0.196939	0.89801	1	0.64045	140	126	POLR2I,POLR2L,SF3B5,LSM2,SNRPD2,POLR2J,SNRPF,POLR2G,SNRPB,POLR2H,SNRPA,PHF5A,POLR2E,SNRPG,SF3A2,AAAS,YBX1,SRSF9,SUGP1,MAGOH,NUP85,NUP37,SNRPE,TXNL4A,SNRNP70,SNRPD1,POLR2C,SNRNP40,SF3B4,SRSF7,SNRPA1,PRPF6,GTF2F1,PCBP1,U2AF2,PCBP2,HNRNPF,SLBP,RNPS1,METTL3,SNRPD3,HNRNPA1,EFTUD2,RAE1,GTF2F2,PABPN1,SNRPB2,POLR2D,CSTF1,POLR2K,PRPF4,CPSF3,CLP1,NUP93,RBMX,SRSF3,NUP43,NUP88,HNRNPA0,NUP188,FUS,DNAJC8,SEH1L…
REACTOME_ACTIVATION_OF_NF_KAPPAB_IN_B_CELLS	0.227535	0.888686	0.833333	0.655959	64	59	PSMB3,UBA52,PSMD3,PSMA7,PSMB10,RPS27A,PSMD8,PSMB4,PSMB5,PSMB8,PSMB1,NFKBIB,PSMB7,PSMB6,PSMC3,PSMD4,PSMD13,PSMB9,PSMA5,PSMC4,PSMB2,PSME1,PSMC5,PSMF1,PSMD9,PSMD14,PSMA3,PSMD10,PSMA1,PSMA4,PSMC2,PSMA2,PSMD2,PSMD6,NFKBIE,SKP1,PSMA6,PSMC6,CUL1,RELA,PSMD11,PSMD12,PSMD7,IKBKB,PSMD5,PSMD1,BCL10,NFKBIA,CARD11,IKBKG,BTRC,PSMC1,PSME4,CHUK,MAP3K7,FBXW11,MALT1,REL,PRKCB
REACTOME_ACTIVATION_OF_CHAPERONE_GENES_BY_XBP1S	0.265256	0.88722	0.755556	0.656654	46	37	YIF1A,WFS1,KLHDC3,ATP6V0D1,PREB,ARFGAP1,SRPRB,ACADVL,CXXC1,ZBTB17,SERP1,LMNA,DDX11,GSK3A,HDGF,KDELR3,TATDN2,GOSR2,PPP2R5B,DNAJB11,CUL7,EXTL3,WIPI1,PDIA6,SSR1,DCTN1,DNAJB9,ADD1,HYOU1,TSPYL2,SHC1,CTDSP2,TPP1,DNAJC3,SEC31A,EDEM1,FKBP14
REACTOME_NEP_NS2_INTERACTS_WITH_THE_CELLULAR_EXPORT_MACHINERY	0.288686	0.883529	0.704918	0.66244	27	26	RAN,AAAS,NUP85,NUP37,RAE1,NUP93,NUP43,NUP88,NUP188,SEH1L,NUP62,NUP35,NUPL2,NUP107,NUP210,NUP54,NUP214,NUP155,NUP133,NUP205,POM121,XPO1,NUP50,TPR,NUP153,RANBP2
REACTOME_NCAM1_INTERACTIONS	-0.642446	-1.40075	0.0126716	0.668714	39	33	COL2A1,CACNA1S,ARTN,NRTN,COL9A2,PSPN,CACNB3,COL9A3,AGRN,CACNA1I,CACNB1,PRNP,COL9A1,CACNB2,CACNA1H,COL6A2,COL6A1,COL4A2,COL4A5,COL4A1,COL1A1,COL5A1,COL4A4,COL1A2,ST8SIA4,COL5A2,ST8SIA2,CACNB4,COL6A3,COL4A3,GFRA1,NCAM1,GDNF
REACTOME_GOLGI_ASSOCIATED_VESICLE_BIOGENESIS	0.250101	0.868041	0.735294	0.687685	53	49	SH3GL2,AP1S1,BLOC1S1,AP1M2,CLTA,TPD52L1,VAMP8,FTH1,DNM2,FTL,SNAPIN,BLOC1S3,GAK,NAPA,DTNBP1,HIP1R,AP4B1,AP1M1,AP1B1,HSPA8,SNX5,RAB5C,ARRB1,NECAP1,OCRL,TFRC,TPD52,YIPF6,AP3S1,TXNDC5,SNX2,SH3D19,PUM1,CLTC,SNX9,VAMP2,VAMP7,SORT1,AP3B1,TGOLN2,AP1G1,IGF2R,TBC1D8B,CPD,PICALM,DNAJC6,AP1S2,AP4E1,PIK3C2A
REACTOME_POST_TRANSLATIONAL_MODIFICATION_SYNTHESIS_OF_GPI_ANCHORED_PROTEINS	0.259451	0.867407	0.641791	0.688885	26	26	DPM3,GPAA1,DPM2,PIGQ,PIGU,PIGC,PIGT,PIGV,PIGH,PIGL,PIGP,PIGO,PIGS,PIGF,PIGG,DPM1,PIGX,PIGW,PLAUR,PIGM,PIGB,PGAP1,PIGA,PIGK,PIGN,SEMA6D
REACTOME_MITOTIC_M_M_G1_PHASES	0.192952	0.858496	1	0.702385	172	156	CENPM,PSMB3,UBA52,CDT1,SPC24,CDC20,B9D2,PSMD3,AURKB,PMF1,BIRC5,E2F1,PSMA7,PSMB10,RPS27A,PSMD8,PSMB4,PSMB5,PSMB8,PSMB1,CDC45,PPP2R1A,PSMB7,MCM5,PLK1,SEC13,PSMB6,PSMC3,PSMD4,MCM7,PSMD13,PSMB9,PSMA5,PSMC4,CENPA,CDCA8,RPA3,MCM2,PSMB2,NUP85,PSME1,NUP37,PSMC5,RPS27,CENPT,RANGAP1,PSMF1,GMNN,POLA2,CENPH,NUDC,ORC6,MAD2L1,ZWINT,PSMD9,PSMD14,ORC5,PSMA3,CENPN,KIF2C,ITGB3BP,ORC1,KIF20A,SPC25,MAD1L1,E2F2,NUF2,…
REACTOME_CONVERSION_FROM_APC_C_CDC20_TO_APC_C_CDH1_IN_LATE_ANAPHASE	0.301509	0.857972	0.651786	0.703371	22	16	ANAPC11,CDC20,UBE2C,ANAPC2,ANAPC7,ANAPC5,CDC16,UBE2E1,CDC23,ANAPC10,CDC26,ANAPC4,UBE2D1,CDC27,ANAPC1,CDC14A
REACTOME_REGULATION_OF_HYPOXIA_INDUCIBLE_FACTOR_HIF_BY_OXYGEN	0.282069	0.85528	0.752475	0.708	25	20	EPO,UBA52,CA9,RPS27A,RBX1,UBE2D2,EGLN2,CUL2,UBE2D3,VEGFA,EGLN3,EGLN1,VHL,HIF1AN,UBE2D1,ARNT,CREBBP,EPAS1,HIF1A,HIF3A
REACTOME_EGFR_DOWNREGULATION	0.278203	0.854027	0.686747	0.709886	25	24	UBA52,SH3GL2,AP2S1,EGF,RPS27A,CLTA,EPN1,SPRY2,HGS,AP2A1,AP2A2,AP2M1,EPS15L1,AP2B1,SH3KBP1,CDC42,GRB2,STAM,CLTC,SPRY1,STAM2,EPS15,EGFR,CBL
REACTOME_G2_M_CHECKPOINTS	0.239079	0.847009	0.791667	0.720944	45	40	CDC45,CCNB1,MCM5,RFC2,CCNB2,CDC25C,MCM7,RPA3,MCM2,RAD9A,ORC6,CDC25A,CHEK2,RFC4,CDK1,ORC5,ORC1,RPA2,MCM4,MCM3,CDC6,MCM6,RFC3,ORC4,RFC5,DBF4,CDK2,HUS1,RAD1,CHEK1,ORC3,RPA1,MCM10,ORC2,CDC7,RAD17,MCM8,WEE1,ATR,ATM
REACTOME_RNA_POL_III_TRANSCRIPTION_INITIATION_FROM_TYPE_2_PROMOTER	0.28139	0.830082	0.777778	0.746145	23	22	POLR2L,POLR2H,POLR3K,POLR1C,POLR2E,GTF3C5,POLR1D,BRF1,POLR3H,POLR3E,POLR3C,POLR2K,POLR3B,POLR3D,TBP,POLR3F,GTF3C2,POLR3A,GTF3C3,POLR3GL,GTF3C4,LZTS1
REACTOME_MRNA_SPLICING	0.211946	0.822767	0.8	0.756089	111	98	POLR2I,POLR2L,SF3B5,LSM2,SNRPD2,POLR2J,SNRPF,POLR2G,SNRPB,POLR2H,SNRPA,PHF5A,POLR2E,SNRPG,SF3A2,YBX1,SRSF9,SUGP1,MAGOH,SNRPE,TXNL4A,SNRNP70,SNRPD1,POLR2C,SNRNP40,SF3B4,SRSF7,SNRPA1,PRPF6,GTF2F1,PCBP1,U2AF2,PCBP2,HNRNPF,RNPS1,SNRPD3,HNRNPA1,EFTUD2,GTF2F2,PABPN1,SNRPB2,POLR2D,CSTF1,POLR2K,PRPF4,CPSF3,CLP1,RBMX,SRSF3,HNRNPA0,FUS,DNAJC8,SF3A3,HNRNPL,DDX23,CSTF2,HNRNPC,HNRNPM,CD2BP2,HNRNPD,SF3B3,SRSF6…
REACTOME_ASSOCIATION_OF_TRIC_CCT_WITH_TARGET_PROTEINS_DURING_BIOSYNTHESIS	0.272567	0.812019	0.734375	0.770667	27	25	FBXW5,FBXO6,CCT7,FBXW4,CCT3,CCT2,CCT4,CCT5,FBXO4,CCT8,CCT6A,TCP1,USP11,LONP2,AP3M1,FKBP9,XRN2,FBXL5,FBXW2,FBXL3,KIF13A,FBXW7,ARFGEF2,SPHK1,KIFC3
REACTOME_LYSOSOME_VESICLE_BIOGENESIS	0.271263	0.803817	0.786667	0.780844	23	22	SH3GL2,AP1S1,BLOC1S1,AP1M2,CLTA,VAMP8,DNM2,AP1M1,AP1B1,HSPA8,DNASE2,ARRB1,CTSZ,M6PR,TXNDC5,CLTC,VAMP2,VAMP7,AP1G1,GNS,DNAJC6,AP1S2
REACTOME_MRNA_PROCESSING	0.196461	0.782603	1	0.809367	161	145	POLR2I,POLR2L,SF3B5,LSM2,SNRPD2,POLR2J,SNRPF,APOBEC1,POLR2G,SNRPB,POLR2H,LSM10,SNRPA,PHF5A,POLR2E,ERCC2,SNRPG,SF3A2,AAAS,YBX1,SRSF9,SUGP1,MAGOH,NUP85,NUP37,SNRPE,TXNL4A,SNRNP70,SNRPD1,POLR2C,SNRNP40,SF3B4,SRSF7,SNRPA1,PRPF6,GTF2F1,PCBP1,GTF2H2,U2AF2,PCBP2,CDK7,HNRNPF,SLBP,RNPS1,METTL3,SNRPD3,HNRNPA1,EFTUD2,RAE1,GTF2F2,PABPN1,SNRPB2,POLR2D,CSTF1,POLR2K,PRPF4,CPSF3,CLP1,NUP93,RBMX,SRSF3,NUP43,NUP88…
REACTOME_IRON_UPTAKE_AND_TRANSPORT	0.233425	0.774851	0.888889	0.81886	36	35	TF,ATP6V0B,ATP6V1F,HMOX2,FTH1,ATP6V0D1,TCIRG1,ATP6V0A4,ATP6V0E1,STEAP3,FTL,SLC40A1,MCOLN1,ATP6V1G1,ATP6V1E1,ATP6V1H,HEPH,ATP6V1E2,FLVCR1,SLC46A1,ATP6V1D,TFRC,ATP6V1C2,ATP6V0C,ATP6V0A2,ATP6V1B1,CP,ATP6V1B2,ABCG2,ATP6V1A,ATP6V1C1,HMOX1,CYBRD1,ATP6V0D2,ATP6V1G2
REACTOME_RNA_POL_III_TRANSCRIPTION_TERMINATION	0.27198	0.77468	0.8	0.819031	19	18	POLR2L,POLR2H,POLR3K,POLR1C,POLR2E,POLR1D,POLR3H,POLR3E,POLR3C,POLR2K,POLR3B,POLR3D,POLR3F,POLR3A,SSB,POLR3GL,NFIB,LZTS1
REACTOME_G1_PHASE	0.223153	0.774554	0.822222	0.819159	38	35	UBA52,PPP2R3B,E2F1,CDKN2A,RPS27A,PPP2R1A,CKS1B,CDK4,CDKN2D,CDKN1A,E2F4,CDK7,E2F2,CCND3,TFDP1,CCND2,CCNH,PPP2CA,SKP1,CDKN2C,CUL1,PPP2R2A,E2F5,SKP2,MNAT1,PPP2CB,PPP2R1B,CDKN1B,E2F3,RBL1,CCND1,RB1,CDK6,RBL2,CDKN2B
REACTOME_A_TETRASACCHARIDE_LINKER_SEQUENCE_IS_REQUIRED_FOR_GAG_SYNTHESIS	-0.553426	-1.18045	0.247578	0.822308	25	23	B4GALT7,B3GALT6,B3GAT3,GPC3,SDC1,AGRN,GPC4,GPC2,SDC4,BCAN,GPC1,SDC3,GXYLT1,GPC5,CSPG4,GXYLT2,HSPG2,SDC2,BGN,DCN,GPC6,VCAN,B3GAT2
REACTOME_SHC1_EVENTS_IN_EGFR_SIGNALING	0.262186	0.739552	0.796992	0.858587	15	15	HRAS,MAP2K2,EGF,MAPK3,CDK1,RAF1,YWHAB,GRB2,MAP2K1,NRAS,SHC1,MAPK1,KRAS,EGFR,SOS1
REACTOME_FGFR_LIGAND_BINDING_AND_ACTIVATION	-0.564769	-1.17279	0.252165	0.871055	22	20	FGF6,FGFR4,FGF19,FGFR3,FGF18,FGF3,FGF17,FGF23,FGF20,KL,FGFR2,FGF9,FGF4,FGFR1,FGF8,KLB,FGF2,FGF7,FGF1,FGF10
REACTOME_DESTABILIZATION_OF_MRNA_BY_KSRP	0.274952	0.719947	0.819672	0.880139	17	15	EXOSC5,EXOSC7,EXOSC1,EXOSC2,EXOSC8,EXOSC3,AKT1,EXOSC6,EXOSC9,PARN,MAPK14,YWHAZ,DIS3,MAPK11,DCP2
REACTOME_SHC_MEDIATED_SIGNALLING	0.262186	0.710651	0.850467	0.888307	15	15	HRAS,MAP2K2,MAPK3,CDK1,SHC2,RAF1,YWHAB,GRB2,MAP2K1,NRAS,SHC1,MAPK1,KRAS,SHC3,SOS1
REACTOME_DEADENYLATION_DEPENDENT_MRNA_DECAY	0.213802	0.705003	0.928571	0.893524	48	39	LSM2,EXOSC5,LSM4,EXOSC7,DCPS,EXOSC1,EXOSC2,EIF4A3,LSM3,EXOSC8,LSM5,DCP1B,EXOSC3,CNOT3,LSM6,LSM1,EXOSC6,EDC3,EDC4,EXOSC9,CNOT10,CNOT7,CNOT8,EIF4B,PAIP1,PARN,EIF4G1,PATL1,EIF4E,CNOT2,TNKS1BP1,DIS3,CNOT4,DCP1A,EIF4A1,CNOT6,DDX6,DCP2,XRN1
REACTOME_NETRIN1_SIGNALING	-0.537951	-1.16846	0.246331	0.900101	41	31	SLIT1,RGMB,SIAH2,SRC,RAC1,EZR,PITPNA,CDC42,PLCG1,PTK2,MYO10,ABLIM1,NTN4,NEO1,NCK1,SIAH1,PRKCQ,WASL,DOCK1,TRIO,ABLIM3,FYN,ROBO1,UNC5A,UNC5B,NTN1,RGMA,SLIT3,SLIT2,TRPC4,TRPC6
REACTOME_UNFOLDED_PROTEIN_RESPONSE	0.201421	0.6937	1	0.902418	80	65	IGFBP1,YIF1A,EXOSC5,EXOSC7,WFS1,KLHDC3,ASNS,ATP6V0D1,DDIT3,EXOSC1,PREB,EXOSC2,ARFGAP1,SRPRB,EXOSC8,ACADVL,ATF4,CXXC1,ZBTB17,SERP1,EXOSC3,LMNA,DDX11,GSK3A,HDGF,EXOSC6,CALR,KDELR3,TATDN2,EXOSC9,EIF2S1,GOSR2,PPP2R5B,DNAJB11,CUL7,EXTL3,ATF3,PARN,WIPI1,PDIA6,HSPA5,SSR1,DCTN1,DNAJB9,MBTPS1,NFYA,ADD1,HYOU1,TSPYL2,HERPUD1,DIS3,MBTPS2,SHC1,NFYB,CTDSP2,TPP1,ATF6,DNAJC3,EIF2AK3,ERN1,SEC31A,EDEM1,DCP2,FKBP14…
REACTOME_AMINE_COMPOUND_SLC_TRANSPORTERS	-0.565255	-1.1829	0.215368	0.907545	27	23	RHCG,SLC18A1,SLC6A7,SLC6A9,SLC6A20,SLC44A4,SLC44A3,RHAG,SLC6A19,SLC44A2,SLC6A18,SLC44A1,SLC6A12,SLC44A5,SLC14A1,SLC6A14,SLC6A6,SLC6A15,SLC14A2,SLC6A3,SLC6A1,SLC6A2,SLC18A2
REACTOME_SIGNALING_BY_GPCR	-0.485556	-1.18279	0.002	0.908252	920	499	CCL16,F2,GCGR,CALCB,OR52E8,KNG1,CALCA,GALR3,PIK3R2,OR51B4,WNT3A,FFAR3,OXT,SAA1,FZD9,KISS1,PTGER1,HTR4,PF4,RGR,OR7D2,OR2W3,OR1F1,GAL,NMU,RASGRF1,SSTR5,WNT16,NPW,PPP1R1B,HCRT,DRD2,CCL25,RXFP4,HRAS,OXER1,MC3R,CHRM1,LPAR2,GNG13,PTH2R,IHH,GNB2,MAP2K2,SCTR,NMB,ADRA1B,WNT4,PRKAR1B,FZD10,PPP1CA,RLN2,CCK,PPP2R1A,CDK5,UTS2,ADORA2B,ARHGEF16,LHB,MAPK3,SCT,CXCL3,CCL20,WNT6,P2RY2,VIPR1,DGKQ,RHOG,P2RY11,ARHGAP4…
REACTOME_GLYCOSPHINGOLIPID_METABOLISM	0.207134	0.683886	0.93617	0.911398	38	34	ARSH,GAL3ST1,ARSE,NEU4,SMPD2,NEU1,SUMF2,GLA,GBA2,GLB1,SMPD3,HEXB,SUMF1,CTSA,ARSA,SMPD4,GBA,SMPD1,NEU3,HEXA,ASAH1,ARSK,CERK,ARSG,PSAP,GALC,STS,GM2A,ARSJ,ENPP7,UGCG,GBA3,ARSB,ARSI
REACTOME_RNA_POL_III_TRANSCRIPTION_INITIATION_FROM_TYPE_3_PROMOTER	0.213615	0.67856	0.96	0.916273	26	25	POLR2L,POLR2H,POLR3K,POLR1C,POLR2E,POLR1D,BRF2,POLR3H,SNAPC2,SNAPC4,POLR3E,POLR3C,POLR2K,POLR3B,POLR3D,TBP,SNAPC5,POLR3F,POLR3A,ZNF143,SNAPC3,POLR3GL,SNAPC1,POU2F1,LZTS1
REACTOME_G_PROTEIN_BETA_GAMMA_SIGNALLING	-0.543187	-1.16598	0.254545	0.916689	28	28	GNG13,GNB2,GNG4,GNG5,AKT2,PLCB3,AKT1,GNB1,RHOA,GNG10,GNG12,PDPK1,GNGT1,GNB5,GNB3,PLCB1,GNG3,PLCB2,GNG11,GNG8,GNG7,GNGT2,GNG2,AKT3,GNB4,PIK3R6,PIK3R5,PIK3CG
REACTOME_RNA_POL_II_TRANSCRIPTION	0.167526	0.673303	1	0.920549	105	88	POLR2I,POLR2L,POLR2J,SNRPF,POLR2G,TAF10,SNRPB,POLR2H,LSM10,POLR2E,ERCC2,SNRPG,GTF2E2,TAF9,SRSF9,SUPT4H1,MAGOH,SNRPE,POLR2C,SRSF7,GTF2F1,GTF2H2,GTF2A2,U2AF2,CDK7,SLBP,RNPS1,SNRPD3,GTF2F2,TAF12,PABPN1,POLR2D,CSTF1,POLR2K,CPSF3,CLP1,SRSF3,CCNH,SUPT5H,GTF2B,SSRP1,TBP,CSTF2,TAF11,TAF5,TAF6,ERCC3,SRSF6,CTDP1,NCBP2,SRSF4,ZNF473,DHX38,RBM8A,CSTF3,MNAT1,NCBP1,ELL,SRSF5,GTF2E1,GTF2H3,UPF3B,CPSF7,GTF2H1,SUP…
REACTOME_G_ALPHA_Z_SIGNALLING_EVENTS	-0.522049	-1.16445	0.222337	0.926873	44	43	GNG13,GNB2,ADCY8,GNG4,GNG5,GNAS,PRKCD,ADCY3,GNB1,ADCY6,PRKCG,RGS19,GNG10,GNAZ,GNAI2,PRKCE,ADRA2A,PRKCQ,GNG12,ADCY9,ADCY2,PRKCA,GNGT1,GNB5,ADCY4,ADCY1,GNB3,GNG3,ADCY7,GNAI1,ADRA2B,GNG11,RGS20,PRKCH,GNG8,GNG7,GNGT2,ADCY5,GNG2,GNB4,RGS4,PRKCB,RGS17
REACTOME_ACTIVATION_OF_GENES_BY_ATF4	0.216535	0.654594	0.977528	0.932589	26	21	IGFBP1,EXOSC5,EXOSC7,ASNS,DDIT3,EXOSC1,EXOSC2,EXOSC8,ATF4,EXOSC3,EXOSC6,EXOSC9,ATF3,PARN,NFYA,HERPUD1,DIS3,NFYB,ATF6,DCP2,CCL2
REACTOME_CTNNB1_PHOSPHORYLATION_CASCADE	0.235947	0.653899	0.866667	0.932931	16	15	PPP2R1A,AXIN1,FRAT2,FRAT1,PPP2R5D,PPP2CA,PPP2R5A,PPP2CB,PPP2R5B,PPP2R5C,CTNNB1,CSNK1A1,PPP2R1B,PPP2R5E,APC
REACTOME_DNA_REPAIR	0.192026	0.649428	1	0.936429	112	100	POLR2I,POLR2L,UBA52,NTHL1,H2AFX,CCNO,POLR2J,POLR2G,MPG,POLD2,POLR2H,XAB2,MGMT,POLD1,RPS27A,UBE2T,MUTYH,MAD2L2,ALKBH2,POLR2E,ERCC2,RFC2,PCNA,FANCG,RPA3,APEX1,SMUG1,OGG1,POLR2C,RAD51,ERCC1,FEN1,GTF2H2,DDB2,FANCE,CDK7,RFC4,ALKBH3,POLB,LIG1,POLE2,XRCC1,POLD4,RPA2,POLR2D,POLR2K,POLE,CCNH,TDP1,RAD52,XRCC6,FANCA,RFC3,RFC5,ERCC3,XPA,FANCD2,FANCC,LIG3,ERCC5,RAD23B,DDB1,FANCL,MNAT1,ERCC8,RPA1,XRCC5,FANCF,G…
REACTOME_LIGAND_GATED_ION_CHANNEL_TRANSPORT	-0.687519	-1.37663	0.0441176	0.941179	21	15	GABRA4,ARHGEF9,GABRR1,GABRB1,GABRB3,GLRA2,GABRA2,GABRB2,GABRA3,GABRG3,HTR3A,HTR3C,GABRG2,GLRB,GABRR2
REACTOME_PYRUVATE_METABOLISM	0.227796	0.632871	0.95	0.947906	19	17	PDHA1,BSG,LDHB,PDK2,PDHB,LDHA,PDK3,SLC16A1,DLD,PDP2,PDHX,DLAT,PDK1,PDP1,PDPR,SLC16A8,PDK4
REACTOME_RNA_POL_I_TRANSCRIPTION_INITIATION	0.212065	0.63038	0.974359	0.949101	25	23	POLR2H,POLR1C,ERCC2,POLR1D,EHMT2,GTF2H2,CDK7,TAF1C,POLR2K,CCNH,ERCC3,POLR1B,MNAT1,POLR1A,UBTF,GTF2H3,GTF2H1,RRN3,TAF1A,TAF1B,GTF2H4,ERCC6,KAT2B
REACTOME_ABC_FAMILY_PROTEINS_MEDIATED_TRANSPORT	-0.59337	-1.28488	0.0889603	0.950406	34	28	APOA1,ABCA4,ABCG8,ABCA12,ABCB6,ABCC8,ABCC6,ABCG5,ABCA2,ABCA7,ABCC3,CFTR,ABCD1,PEX19,ABCG1,PEX3,ABCD3,ABCC2,ABCB10,ABCC1,ABCC5,ABCB1,ABCC4,ABCA3,ABCA6,ABCC9,ABCA10,ABCA8
REACTOME_INTRINSIC_PATHWAY_FOR_APOPTOSIS	0.20106	0.623808	0.981818	0.953453	30	28	BID,E2F1,BAX,BAD,TP53,BAK1,DYNLL1,GZMB,AKT1,BCL2L1,CYCS,TFDP1,DYNLL2,DIABLO,CASP9,NMT1,CASP7,CASP3,YWHAB,PPP3R1,CASP8,MAPK8,XIAP,PMAIP1,APAF1,BCL2L11,BMF,BCL2
REACTOME_AXON_GUIDANCE	-0.491672	-1.19328	0.038	0.953577	251	217	ITGA2B,COL2A1,CACNA1S,SLIT1,SH3GL2,HRAS,ARTN,AP2S1,MAP2K2,CLTA,NRTN,PFN1,PAK4,CDK5,MAPK3,COL9A2,MYL6,RHOG,RRAS,RGMB,ERBB2,RPS6KA4,RPS6KA1,CSNK2B,RHOC,CFL1,MYL12B,DNM2,PLXNB1,AP2A1,PSPN,AP2A2,CDK1,NCK2,PLXNA3,SIAH2,AP2M1,CACNB3,VASP,SRC,CSNK2A2,DLG3,PFN2,MYH14,LIMK1,STIP1,RAC1,CD24,AP2B1,RAF1,RND1,SPTBN2,SPTBN5,RHOA,COL9A3,RHOB,AGRN,PAK1,HSP90AB1,EZR,CACNA1I,KIF4A,PLXNA1,SEMA4D,CSNK2A1,PITPNA,CACN…
REACTOME_SYNTHESIS_OF_GLYCOSYLPHOSPHATIDYLINOSITOL_GPI	0.215634	0.610862	0.958333	0.961133	17	17	DPM2,PIGQ,PIGC,PIGV,PIGH,PIGL,PIGP,PIGO,PIGF,PIGG,PIGX,PIGW,PIGM,PIGB,PIGA,PIGN,SEMA6D
REACTOME_INWARDLY_RECTIFYING_K_CHANNELS	-0.545384	-1.15875	0.248401	0.965794	31	28	KCNJ9,GNB2,KCNJ12,KCNJ11,ABCC8,GNG4,KCNJ14,GNG5,GNB1,KCNJ3,GABBR1,GNG10,KCNJ4,KCNJ2,GNG12,GNGT1,GNB3,GNG3,KCNJ8,GNG8,GNG7,GNGT2,GNG2,KCNJ10,KCNJ16,KCNJ15,KCNJ5,ABCC9
REACTOME_PEPTIDE_LIGAND_BINDING_RECEPTORS	-0.487457	-1.1587	0.117117	0.966191	188	133	CCL16,F2,KNG1,GALR3,OXT,SAA1,KISS1,PF4,GAL,NMU,SSTR5,NPW,HCRT,CCL25,RXFP4,MC3R,NMB,RLN2,CCK,UTS2,CXCL3,CCL20,GAST,UTS2R,NPY5R,NPY2R,CXCR3,CXCL2,PYY,CXCL1,KISS1R,AGT,CCR10,CCL28,EDN2,HEBP1,NPSR1,NMUR2,NPFFR1,MC1R,F2RL1,C5,TAC3,SSTR1,GALR2,XCL1,INSL5,CXCL16,OPRD1,APP,EDN3,POMC,INSL3,XCL2,PPY,GRPR,ANXA1,QRFP,BDKRB2,BDKRB1,TACR2,CCKBR,TAC1,QRFPR,CX3CL1,CCL5,CXCR6,CCL3L3,EDN1,CXCL11,AVPR2,SST,XCR1,AGT…
REACTOME_DESTABILIZATION_OF_MRNA_BY_BRF1	0.213554	0.599158	0.941748	0.966935	17	16	EXOSC5,EXOSC7,EXOSC1,EXOSC2,EXOSC8,EXOSC3,AKT1,EXOSC6,EXOSC9,MAPKAPK2,YWHAB,DIS3,DCP1A,ZFP36L1,DCP2,XRN1
REACTOME_DESTABILIZATION_OF_MRNA_BY_TRISTETRAPROLIN_TTP	0.213554	0.597161	0.965217	0.967874	17	16	EXOSC5,EXOSC7,EXOSC1,EXOSC2,EXOSC8,EXOSC3,EXOSC6,EXOSC9,MAPKAPK2,YWHAB,ZFP36,DIS3,DCP1A,TNPO1,DCP2,XRN1
REACTOME_PYRUVATE_METABOLISM_AND_CITRIC_ACID_TCA_CYCLE	0.16807	0.591799	0.978261	0.97069	48	39	IDH3G,D2HGDH,MDH2,IDH3B,IDH2,SUCLG1,PDHA1,BSG,FH,SDHB,LDHB,SDHA,ACO2,PDK2,DLST,PDHB,CS,OGDH,IDH1,LDHA,PDK3,SDHC,SDHD,SLC16A1,SUCLG2,DLD,IDH3A,SUCLA2,PDP2,PDHX,L2HGDH,DLAT,NNT,PDK1,PDP1,PDPR,SLC16A8,PDK4,ADHFE1
REACTOME_BIOSYNTHESIS_OF_THE_N_GLYCAN_PRECURSOR_DOLICHOL_LIPID_LINKED_OLIGOSACCHARIDE_LLO_AND_TRANSFER_TO_A_NASCENT_PROTEIN	0.181348	0.585247	0.941176	0.970968	29	28	DPM3,ALG3,DPM2,PMM1,ALG14,DOLPP1,GMPPB,GMPPA,ALG5,ALG12,DOLK,ALG1,MPI,DPAGT1,ALG2,RFT1,ALG8,DPM1,GNPNAT1,ALG13,ALG6,ALG9,PMM2,PGM3,ALG10,ALG11,ALG10B,GFPT2
REACTOME_HIV_LIFE_CYCLE	0.154645	0.591068	1	0.970988	125	102	POLR2I,POLR2L,UBA52,POLR2J,POLR2G,TAF10,VPS28,POLR2H,HMGA1,RPS27A,PPIA,POLR2E,ERCC2,RAN,BANF1,AAAS,GTF2E2,RANBP1,TAF9,RCC1,SUPT4H1,NUP85,NUP37,RANGAP1,POLR2C,GTF2F1,FEN1,GTF2H2,GTF2A2,VPS37B,VPS37D,CDK7,LIG1,RAE1,GTF2F2,TAF12,POLR2D,POLR2K,TSG101,NUP93,NUP43,NUP88,CCNH,NUP188,SEH1L,SUPT5H,GTF2B,SSRP1,NUP62,NUP35,TBP,XRCC6,TAF11,TAF5,TAF6,VPS37C,NMT1,ERCC3,NUPL2,CTDP1,NCBP2,NUP107,NUP210,NUP54,MNA…
REACTOME_CA_DEPENDENT_EVENTS	-0.532678	-1.14194	0.28115	0.976451	30	28	PRKAR1B,ADCY8,CALM3,PRKCD,CALM2,ADCY3,CALM1,ADCY6,PRKACA,PRKCG,PRKAR2A,PLA2G4A,MAPK1,ADCY9,ADCY2,PRKACB,PRKCA,ADCY4,ADCY1,PRKAR1A,ADCY7,CREB1,PRKACG,PRKAR2B,ADCY5,PDE1A,PDE1B,CAMK4
REACTOME_INTERACTION_BETWEEN_L1_AND_ANKYRINS	-0.589963	-1.18992	0.213656	0.98101	23	17	SPTBN2,SPTBN5,SCN5A,SPTAN1,NRCAM,SPTBN1,L1CAM,ANK3,SPTBN4,ANK1,SCN8A,SCN2A,SCN1B,KCNQ2,SCN3B,KCNQ3,SCN7A
REACTOME_PERK_REGULATED_GENE_EXPRESSION	0.179868	0.555271	0.988889	0.981823	29	24	IGFBP1,EXOSC5,EXOSC7,ASNS,DDIT3,EXOSC1,EXOSC2,EXOSC8,ATF4,EXOSC3,EXOSC6,EXOSC9,EIF2S1,ATF3,PARN,HSPA5,NFYA,HERPUD1,DIS3,NFYB,ATF6,EIF2AK3,DCP2,CCL2
REACTOME_HEPARAN_SULFATE_HEPARIN_HS_GAG_METABOLISM	-0.527104	-1.18972	0.173293	0.982875	52	47	IDUA,B4GALT7,B3GALT6,B3GAT3,NAGLU,GUSB,HS3ST6,SGSH,GPC3,SDC1,HS3ST1,GLB1,AGRN,GPC4,EXT2,GPC2,SDC4,GLCE,BCAN,HS6ST1,HS6ST2,GPC1,EXT1,HPSE,SDC3,HS2ST1,GXYLT1,NDST1,GPC5,IDS,CSPG4,NDST4,GXYLT2,HSPG2,SDC2,BGN,HS3ST5,HS3ST3A1,NDST2,DCN,HS3ST2,HS3ST4,HS3ST3B1,GPC6,VCAN,NDST3,B3GAT2
REACTOME_INFLAMMASOMES	-0.578698	-1.18951	0.229075	0.984529	17	16	PYCARD,CASP1,TXN,BCL2L1,HSP90AB1,APP,PANX1,TXNIP,AIM2,PSTPIP1,BCL2,NLRP1,MEFV,NLRP3,NLRC4,P2RX7
REACTOME_PKB_MEDIATED_EVENTS	0.172004	0.544231	1	0.985356	29	27	EIF4EBP1,RPS6,MLST8,STK11,AKT2,PRKAB1,PRKAG1,TSC2,CAB39L,STRADB,RHEB,RPTOR,PRKAG2,EIF4B,EIF4G1,EIF4E,TSC1,MTOR,PPM1A,EEF2K,STRADA,CAB39,PRKAA1,PRKAB2,RPS6KB1,PDE3B,PRKAA2
REACTOME_G_BETA_GAMMA_SIGNALLING_THROUGH_PI3KGAMMA	-0.539832	-1.15567	0.269603	0.986879	25	25	GNG13,GNB2,GNG4,GNG5,AKT2,AKT1,GNB1,RHOA,GNG10,GNG12,PDPK1,GNGT1,GNB5,GNB3,GNG3,GNG11,GNG8,GNG7,GNGT2,GNG2,AKT3,GNB4,PIK3R6,PIK3R5,PIK3CG
REACTOME_METABOLISM_OF_VITAMINS_AND_COFACTORS	0.14589	0.528063	1	0.989102	51	48	GSTO2,FPGS,FLAD1,SLC19A1,SLC23A1,QPRT,GSTO1,SLC5A6,NADSYN1,COASY,NMNAT3,CYB5A,FASN,PPCDC,PPCS,PNPO,MOCS3,PANK4,NFS1,NADK,MOCS2,SLC2A1,MOCOS,NMNAT1,MTHFD1,GPHN,SLC25A16,CYB5R3,THTPA,RFK,DHFR,SLC19A3,SLC19A2,SLC46A1,PANK2,TPK1,SLC25A32,PANK1,MOCS1,MTHFR,AASDHPPT,ACP5,NMNAT2,SLC23A2,NAMPT,PANK3,ENPP1,SLC2A3
REACTOME_RNA_POL_I_TRANSCRIPTION_TERMINATION	0.18291	0.518112	0.979167	0.991529	22	20	POLR2H,POLR1C,ERCC2,POLR1D,GTF2H2,CDK7,TAF1C,POLR2K,CCNH,ERCC3,POLR1B,MNAT1,POLR1A,UBTF,GTF2H3,GTF2H1,TAF1A,TAF1B,GTF2H4,PTRF
REACTOME_RNA_POL_III_TRANSCRIPTION	0.155962	0.511574	0.979592	0.992635	33	32	POLR2L,POLR2H,POLR3K,POLR1C,POLR2E,GTF3C5,POLR1D,BRF2,BRF1,POLR3H,SNAPC2,SNAPC4,POLR3E,POLR3C,POLR2K,POLR3B,POLR3D,TBP,SNAPC5,POLR3F,GTF3C2,POLR3A,ZNF143,GTF3C3,SSB,SNAPC3,POLR3GL,SNAPC1,GTF3C4,NFIB,POU2F1,LZTS1
REACTOME_FACTORS_INVOLVED_IN_MEGAKARYOCYTE_DEVELOPMENT_AND_PLATELET_PRODUCTION	-0.48707	-1.15474	0.157789	0.992925	132	107	HBE1,HBD,SH2B2,ZFPM1,PRKAR1B,CDK5,KIF9,HMG20B,ITPK1,KIF22,KIFC1,TP53,HBG2,KLC4,IRF3,KIF26A,DOCK6,GATA6,KIF2C,HDAC1,KIF20A,AKAP1,NFE2,SH2B1,KLC2,IRF7,RAD51C,KDM1A,RACGAP1,GATA2,RAC1,EHD1,CABLES2,KLC3,MYB,CAPZA2,MFN2,PRKACA,HDAC2,AK3,CDK2,MAFG,KLC1,MAFK,CAPZA1,KIF4A,KIF23,VPS45,KIF18A,IRF2,IRF1,CDC42,KIF15,MAFF,CABLES1,KIF11,RAD51B,ABL1,MFN1,PRKAR2A,RCOR1,HBB,KIFAP3,GATA5,KIF3B,H3F3A,SIN3A,AKAP10,R…
REACTOME_L1CAM_INTERACTIONS	-0.489862	-1.1392	0.219736	0.99528	86	73	ITGA2B,SH3GL2,AP2S1,MAP2K2,CLTA,MAPK3,RPS6KA4,RPS6KA1,CSNK2B,DNM2,AP2A1,AP2A2,AP2M1,SRC,CSNK2A2,DLG3,STIP1,RAC1,CD24,AP2B1,SPTBN2,SPTBN5,PAK1,EZR,KIF4A,CSNK2A1,DNM1,SCN5A,MAP2K1,RPS6KA6,CLTC,RPS6KA3,SPTAN1,MAPK1,RANBP9,ITGA9,SDCBP,DPYSL2,LAMA1,DLG1,NRCAM,ALCAM,SPTBN1,L1CAM,RPS6KA2,ANK3,LAMB1,SPTBN4,ITGA2,EGFR,ANK1,SCN8A,ITGB1,LAMC1,RDX,ITGA1,RPS6KA5,MSN,ITGAV,FGFR1,ITGA5,SCN2A,NRP2,CNTNAP1,SCN1B,…
REACTOME_PLC_BETA_MEDIATED_EVENTS	-0.516127	-1.13879	0.272727	0.998074	43	38	PRKAR1B,ADCY8,PLCB3,CALM3,PRKCD,CALM2,ADCY3,CALM1,ADCY6,PRKACA,ITPR3,PLCB4,PRKCG,PRKAR2A,PLA2G4A,MAPK1,GNAZ,GNAI2,ADCY9,ADCY2,PRKACB,PRKCA,ADCY4,ADCY1,PRKAR1A,PLCB1,ADCY7,CREB1,GNAI1,PLCB2,PRKACG,ITPR2,PRKAR2B,ADCY5,PDE1A,GNAO1,PDE1B,CAMK4
REACTOME_ANTIGEN_PROCESSING_UBIQUITINATION_PROTEASOME_DEGRADATION	-0.129281	-0.309527	1	0.999961	212	184	ASB12,ANAPC11,PSMB3,SOCS1,UBA52,UBE2S,CDC34,CDC20,RBCK1,PSMD3,FBXO2,STUB1,PSMA7,ASB9,PSMB10,RPS27A,PSMD8,PSMB4,UBE2M,PSMB5,PSMB8,PSMB1,KEAP1,FBXO6,UBE2C,FBXO44,PSMB7,RBX1,UBE2J2,PSMB6,PSMC3,PSMD4,ASB13,PSMD13,PSMB9,PSMA5,ANAPC2,PSMC4,RNF25,PSMB2,PSME1,ANAPC7,PSMC5,LRSAM1,KLHL13,PSMF1,HECTD3,ANAPC5,ASB6,RNF220,UBE2D4,ASB4,UBE2D2,UBA1,PSMD9,LRR1,PSMD14,RNF41,PSMA3,UBOX5,CDC16,FBXO4,UBE2N,PSMD10,PSM…
REACTOME_GLYCEROPHOSPHOLIPID_BIOSYNTHESIS	-0.126478	-0.29482	1	0.999985	82	76	PLA2G4D,PLA2G1B,AGPAT2,PCYT2,PEMT,PLA2G10,PTDSS2,PLA2G4F,TAZ,PNPLA2,GPD1,CRLS1,PLA2G2E,LPCAT4,DGAT2,PLA2G3,PLA2G6,CHKA,PLD6,MBOAT7,SLC44A4,CDIPT,PTDSS1,SLC44A3,CHPT1,AGPAT5,HADHA,LPIN3,CHKB,PLA2G16,PLBD1,AGPAT3,SLC44A2,GNPAT,PLA2G12A,MBOAT1,PGS1,HADHB,PLA2G2A,GPAT2,CDS1,MGLL,GPD1L,PLD2,PLD3,LPCAT1,LPCAT3,SLC44A1,PITPNB,GPCPD1,PHOSPHO1,ACHE,ETNK1,SLC44A5,ETNK2,LCLAT1,PLA2G4A,CEPT1,CDS2,PCYT1A,PNPL…
REACTOME_ACYL_CHAIN_REMODELLING_OF_PG	-0.277081	-0.563264	0.950783	1	16	16	PLA2G4D,PLA2G1B,PLA2G10,PLA2G4F,CRLS1,PLA2G2E,LPCAT4,PLA2G3,PLA2G12A,PLA2G2A,LPCAT1,PLA2G4A,LPGAT1,PLA2G2F,PLA2G2D,PLA2G5
REACTOME_ACYL_CHAIN_REMODELLING_OF_PS	-0.305631	-0.606981	0.954853	1	15	15	PLA2G4D,PLA2G1B,PLA2G10,PLA2G4F,PLA2G2E,LPCAT4,PLA2G16,PLA2G12A,MBOAT1,PLA2G2A,LPCAT3,PLA2G4A,PLA2G2F,PLA2G2D,PLA2G5
REACTOME_ACYL_CHAIN_REMODELLING_OF_PI	-0.327234	-0.645556	0.91629	1	15	15	PLA2G4D,PLA2G1B,PLA2G10,PLA2G4F,PLA2G2E,MBOAT7,PLA2G16,PLBD1,PLA2G12A,PLA2G2A,PLA2G4A,PLA2G2F,PLA2G4C,PLA2G2D,PLA2G5
REACTOME_ADAPTIVE_IMMUNE_SYSTEM	-0.37134	-0.905672	0.895	1	539	482	PIK3R2,ASB12,ANAPC11,PSMB3,SOCS1,UBA52,SH3GL2,MLST8,CYBA,TRIB3,UBE2S,AP1S1,HRAS,DCTN3,CDC34,CDC20,AP2S1,RPS6KB2,AP1M2,RBCK1,PSMD3,FBXO2,STUB1,PSMA7,ASB9,PSMB10,RPS27A,PSMD8,PSMB4,CLTA,UBE2M,PSMB5,PSMB8,PSMB1,KEAP1,IFITM1,FBXO6,UBE2C,RILP,PPP2R1A,NFKBIB,FBXO44,PSMB7,SEC13,HLA-G,ACTR1B,RBX1,AKT1S1,UBE2J2,PSMB6,PSMC3,SEC61B,PSMD4,TNFRSF14,BAD,ASB13,PSMD13,PSMB9,PSMA5,KIF22,ANAPC2,PSMC4,RNF25,ULBP1,P…
REACTOME_RIG_I_MDA5_MEDIATED_INDUCTION_OF_IFN_ALPHA_BETA_PATHWAYS	-0.214727	-0.49342	0.996948	1	73	55	SAA1,UBA52,PIN1,RPS27A,NFKBIB,ISG15,FADD,IRF3,TRAF2,RNF135,UBE2D2,PCBP2,IKBKE,OTUD5,IRF7,NLRX1,AGER,ATG5,RELA,DHX58,UBE2L6,MAVS,UBE2D3,IKBKB,IRF2,IRF1,HMGB1,NFKB2,UBE2K,CASP10,TRAF3,NFKBIA,APP,RIPK1,NLRC5,IKBKG,SIKE1,TAX1BP1,TANK,ATG12,CASP8,UBE2D1,CHUK,TBK1,CREBBP,TRAF6,IFIH1,RNF125,DDX58,MAP3K1,S100B,TNFAIP3,CYLD,HERC5,S100A12
REACTOME_CHONDROITIN_SULFATE_BIOSYNTHESIS	-0.625564	-1.27382	0.131818	1	21	16	CHST9,CHST13,CHPF,CHST7,BCAN,CSGALNACT1,CSPG4,CHSY1,CHST3,CSGALNACT2,BGN,CHST15,CHST11,DCN,VCAN,CHSY3
REACTOME_REGULATION_OF_SIGNALING_BY_CBL	-0.29806	-0.614381	0.933624	1	18	18	PIK3R2,SYK,BLNK,CRKL,GRB2,CRK,PIK3R3,LYN,RAPGEF1,PIK3CB,YES1,PIK3R1,CBL,VAV1,PIK3CA,FYN,HCK,PIK3CD
REACTOME_AMINO_ACID_AND_OLIGOPEPTIDE_SLC_TRANSPORTERS	-0.358235	-0.804982	0.818088	1	49	43	SLC38A3,SLC25A10,SLC38A5,SLC17A1,SLC7A9,SLC1A7,SLC1A5,SLC7A5,SLC43A1,SLC38A4,SLC3A2,SLC6A20,SLC3A1,SLC43A2,SLC6A19,SLC7A8,SLC1A4,SLC7A1,SLC6A18,SLC15A4,SLC6A12,SLC15A1,SLC17A5,SLC7A6,SLC1A1,SLC38A1,SLC1A2,SLC6A14,SLC7A11,SLC38A2,SLC7A7,SLC15A3,SLC6A6,SLC36A1,SLC16A10,SLC15A2,SLC6A15,SLC7A2,SLC5A8,SLC32A1,SLC7A3,SLC1A3,SLC7A10
REACTOME_PLATELET_HOMEOSTASIS	-0.566596	-1.31522	0.0232558	1	78	70	APOB,ATP2B2,GNG13,GNB2,KCNMB4,ATP2A1,PPP2R1A,GNG4,GNG5,NOS2,PDE9A,ATP2A3,GNAS,PTPN6,PPP2R5D,PPP2CA,PPP2R5A,GNB1,ITPR3,PPP2CB,PPP2R5B,PPP2R5C,LRP8,MAPK14,PPP2R1B,ATP2A2,PLA2G4A,NOS3,GNG10,SLC8A2,GNG12,PPP2R5E,GNGT1,PDE3B,GNB5,PDE6A,GNB3,GNG3,GNG11,ITPR2,PDE3A,P2RX1,GNG8,KCNMB3,FGR,PDE5A,PECAM1,PRKG2,PDE11A,GNG7,GUCY1B3,PRKG1,GNGT2,KCNMB1,PTGIR,GNG2,MRVI1,PDE10A,PDE6G,GNB4,PDE1A,GUCY1A3,PDE6B,PDE2A…
REACTOME_POST_CHAPERONIN_TUBULIN_FOLDING_PATHWAY	-0.396609	-0.817845	0.738411	1	19	18	TUBA3C,TUBB4B,TUBA4A,TBCB,TBCD,TUBA1C,TBCC,TUBA1B,TBCA,TBCE,TUBB2A,TUBB3,TUBA1A,TUBB6,TUBB2B,TUBA3D,TUBB4A,TUBB1
REACTOME_POST_NMDA_RECEPTOR_ACTIVATION_EVENTS	-0.437455	-0.960309	0.586316	1	33	32	GRIN2C,RASGRF1,HRAS,GRIN2D,RRAS,RPS6KA1,ADCY8,CAMKK1,GRIN1,CALM3,CALM2,ADCY3,NEFL,CALM1,RAF1,RPS6KA6,RPS6KA3,MAPK1,CAMK2D,PDPK1,PRKACB,RPS6KA2,ADCY1,BRAF,CREB1,AKAP9,ACTN2,RASGRF2,GRIN2B,CAMK2B,CAMK2A,CAMK4
REACTOME_POST_TRANSLATIONAL_PROTEIN_MODIFICATION	-0.148643	-0.359298	1	1	188	172	F2,ARSH,F7,DPM3,PROZ,MUCL1,ARSE,DOHH,GPAA1,ALG3,ST6GALNAC4,DPM2,F10,DHPS,GALNT8,PROC,PIGQ,MUC12,MGAT4B,EIF5A,PMM1,SEC13,B3GNT8,ALG14,GALNTL6,B3GNT4,DOLPP1,MUC5AC,B3GNTL1,B4GALT2,GMPPB,B4GALT3,PREB,GMPPA,ALG5,ALG12,RPN1,DOLK,DDOST,DAD1,B3GNT3,PRKCSH,MAN1B1,PIGU,SUMF2,ALG1,PIGC,PIGT,EDEM2,MPI,DPAGT1,MOGS,MUC5B,GCNT4,ALG2,PIGV,RFT1,PIGH,PIGL,CALR,PIGP,SUMF1,ARSA,PIGO,B3GNT6,ALG8,C1GALT1C1,MGAT2,MUC6…
REACTOME_POTASSIUM_CHANNELS	-0.572816	-1.33724	0.00906344	1	98	78	KCNG2,KCNK7,KCNG1,KCNJ9,GNB2,KCNMB4,KCNQ4,KCNN4,HCN1,KCNJ12,KCNQ1,KCNJ11,KCNN2,ABCC8,KCNA10,GNG4,KCNJ14,GNG5,HCN3,KCNH3,KCNK9,KCNK1,KCNH2,KCNF1,KCNK6,GNB1,KCNJ3,KCNAB2,KCNA2,HCN2,GABBR1,KCNC4,KCNK17,GNG10,KCNJ4,KCNH8,KCNH6,KCNJ2,GNG12,KCNS3,GNGT1,KCNH4,GNB3,GNG3,KCNK10,KCNC2,KCNJ8,KCNV1,KCNC3,KCNAB3,GNG8,KCNMB3,KCNS1,KCNG3,GNG7,KCND3,GNGT2,KCND1,KCNMB1,GNG2,KCNB2,KCNQ2,KCNK3,KCNB1,KCNJ10,KCNA5,KC…
REACTOME_AMINE_LIGAND_BINDING_RECEPTORS	-0.568106	-1.20911	0.187636	1	38	23	HTR4,DRD2,CHRM1,ADRA1B,HTR1D,ADRA1D,ADRB1,HTR2C,CHRM3,HRH1,ADRA2A,HTR1F,ADRA2B,HRH4,DRD1,HTR1B,DRD5,ADRB2,ADRB3,CHRM2,HRH2,HTR2B,HRH3
REACTOME_PREFOLDIN_MEDIATED_TRANSFER_OF_SUBSTRATE_TO_CCT_TRIC	-0.331909	-0.70609	0.886975	1	28	26	TUBA3C,TUBB4B,TUBA4A,PFDN5,PFDN2,CCT7,ACTB,TUBA1C,CCT3,CCT2,CCT4,PFDN1,CCT5,CCT8,CCT6A,TCP1,PFDN4,VBP1,TUBB2A,TUBB3,TUBA1A,TUBB6,TUBB2B,TUBA3D,TUBB4A,TUBB1
REACTOME_PRE_NOTCH_EXPRESSION_AND_PROCESSING	-0.402949	-0.889134	0.691099	1	44	36	E2F1,RFNG,ATP2A1,LFNG,KAT2A,TP53,ATP2A3,TFDP1,MOV10,FURIN,JUN,TMED2,ST3GAL3,POGLUT1,SNW1,ATP2A2,E2F3,RAB6A,MAML1,B4GALT1,CCND1,MAML3,CREBBP,TNRC6C,RBPJ,TNRC6A,MAML2,SEL1L,NOTCH4,TNRC6B,MFNG,NOTCH2,KAT2B,NOTCH3,MAMLD1,ST3GAL6
REACTOME_PRE_NOTCH_PROCESSING_IN_GOLGI	-0.483548	-0.975621	0.568516	1	16	16	RFNG,ATP2A1,LFNG,ATP2A3,FURIN,TMED2,ST3GAL3,ATP2A2,RAB6A,B4GALT1,SEL1L,NOTCH4,MFNG,NOTCH2,NOTCH3,ST3GAL6
REACTOME_PRE_NOTCH_TRANSCRIPTION_AND_TRANSLATION	-0.468371	-0.974994	0.562775	1	29	22	E2F1,KAT2A,TP53,TFDP1,MOV10,JUN,SNW1,E2F3,MAML1,CCND1,MAML3,CREBBP,TNRC6C,RBPJ,TNRC6A,MAML2,NOTCH4,TNRC6B,NOTCH2,KAT2B,NOTCH3,MAMLD1
REACTOME_PROLONGED_ERK_ACTIVATION_EVENTS	-0.322517	-0.655894	0.924695	1	19	18	HRAS,MAP2K2,MAPK3,CDK1,RAF1,YWHAB,PLCG1,MAP2K1,CRK,NRAS,MAPK1,RAP1A,RAPGEF1,KRAS,FRS2,BRAF,KIDINS220,NGF
REACTOME_PROSTACYCLIN_SIGNALLING_THROUGH_PROSTACYCLIN_RECEPTOR	-0.517888	-1.06421	0.414661	1	19	19	GNG13,GNB2,GNG4,GNG5,GNAS,GNB1,GNG10,GNG12,GNGT1,GNB5,GNB3,GNG3,GNG11,GNG8,GNG7,GNGT2,PTGIR,GNG2,GNB4
REACTOME_REGULATION_OF_WATER_BALANCE_BY_RENAL_AQUAPORINS	-0.487976	-1.09479	0.336091	1	44	40	GNG13,GNB2,PRKAR1B,ADCY8,GNG4,GNG5,GNAS,ADCY3,RAB11A,GNB1,ADCY6,PRKACA,AQP3,PRKAR2A,MYO5B,GNG10,GNG12,ADCY9,ADCY2,PRKACB,GNGT1,GNB5,ADCY4,ADCY1,GNB3,PRKAR1A,GNG3,ADCY7,AQP1,RAB11FIP2,AVPR2,GNG11,PRKACG,GNG8,PRKAR2B,GNG7,GNGT2,ADCY5,GNG2,GNB4
REACTOME_PROTEIN_FOLDING	-0.20918	-0.473825	0.99897	1	53	49	TUBA3C,FBXW5,TUBB4B,TUBA4A,PFDN5,PFDN2,TBCB,FBXO6,CCT7,ACTB,TBCD,FBXW4,TUBA1C,CCT3,CCT2,TBCC,CCT4,PFDN1,CCT5,TUBA1B,FBXO4,TBCA,CCT8,TBCE,CCT6A,TCP1,PFDN4,VBP1,TUBB2A,USP11,LONP2,AP3M1,FKBP9,XRN2,FBXL5,TUBB3,FBXW2,FBXL3,KIF13A,FBXW7,ARFGEF2,TUBA1A,SPHK1,KIFC3,TUBB6,TUBB2B,TUBA3D,TUBB4A,TUBB1
REACTOME_PURINE_METABOLISM	-0.212131	-0.460892	0.993576	1	33	31	GPX1,NT5C,APRT,GMPR,ADA,IMPDH2,ADSL,IMPDH1,ADK,DGUOK,ATIC,PNP,HPRT1,GMPR2,PAICS,CAT,PFAS,AMPD2,GART,NT5E,GMPS,ADSS,DCK,GDA,PPAT,ADAL,XDH,ADSSL1,NT5C2,AMPD3,AMPD1
REACTOME_ADP_SIGNALLING_THROUGH_P2RY12	-0.520942	-1.06564	0.408389	1	21	20	GNG13,GNB2,GNG4,GNG5,GNB1,GNG10,GNAI2,GNG12,GNGT1,GNB5,GNB3,GNG3,GNAI1,GNG11,GNG8,GNG7,GNGT2,GNG2,GNB4,P2RY12
REACTOME_RAP1_SIGNALLING	-0.513518	-1.03695	0.466439	1	17	16	RAP1GAP,SIPA1,RAF1,PRKACA,RAP1GAP2,RAPGEF3,YWHAB,YWHAZ,RAP1B,RAP1A,PRKACB,RAPGEF4,PRKACG,PRKG1,RASGRP2,RASGRP1
REACTOME_RECRUITMENT_OF_MITOTIC_CENTROSOME_PROTEINS_AND_COMPLEXES	-0.23168	-0.534224	0.994898	1	66	61	SSNA1,TUBB4B,DCTN3,TUBA4A,TUBG1,PPP2R1A,CCNB1,PLK1,TUBGCP2,DCTN2,DYNLL1,CETN2,TUBGCP6,CDK1,NEK2,YWHAE,CSNK1D,TUBB,CEP70,ACTR1A,CEP72,PRKACA,TUBG2,CEP250,OFD1,TUBGCP3,CEP41,CEP76,HAUS2,PLK4,CEP164,CEP57,HSP90AA1,DCTN1,FGFR1OP,DYNC1I2,TUBGCP5,NUMA1,CDK5RAP2,CKAP5,MAPRE1,YWHAG,PCNT,CEP63,CENPJ,SDCCAG8,DYNC1H1,PCM1,NEDD1,CLASP1,PAFAH1B1,CNTRL,TUBA1A,NINL,CEP290,CEP192,ALMS1,CEP135,AKAP9,PRKAR2B,TUBB4A
REACTOME_RECYCLING_PATHWAY_OF_L1	-0.248427	-0.535046	0.972678	1	27	24	SH3GL2,AP2S1,CLTA,RPS6KA4,RPS6KA1,DNM2,AP2A1,AP2A2,AP2M1,SRC,AP2B1,EZR,KIF4A,DNM1,RPS6KA6,CLTC,RPS6KA3,MAPK1,DPYSL2,L1CAM,RPS6KA2,RDX,RPS6KA5,MSN
REACTOME_REGULATION_OF_BETA_CELL_DEVELOPMENT	-0.372988	-0.804734	0.791622	1	30	27	SLC2A2,PKLR,FOXA3,PDX1,FOXA2,HNF1B,ONECUT1,AKT2,HNF1A,HES1,NEUROG3,AKT1,ONECUT3,NKX6-1,HNF4A,PAX6,PTF1A,NR5A2,HNF4G,RBPJ,FOXO1,INS,INSM1,NKX2-2,AKT3,NEUROD1,FGF10
REACTOME_REGULATION_OF_GENE_EXPRESSION_IN_BETA_CELLS	-0.288691	-0.580838	0.948718	1	20	17	SLC2A2,PKLR,FOXA3,PDX1,FOXA2,AKT2,HNF1A,AKT1,NKX6-1,HNF4A,PAX6,HNF4G,FOXO1,INS,NKX2-2,AKT3,NEUROD1
REACTOME_REGULATION_OF_INSULIN_LIKE_GROWTH_FACTOR_IGF_ACTIVITY_BY_INSULIN_LIKE_GROWTH_FACTOR_BINDING_PROTEINS_IGFBPS	-0.417621	-0.831309	0.75286	1	16	15	F2,IGFBP1,IGFALS,IGF2,IGFBP2,KLK3,IGFBP4,IGFBP6,IGFBP3,MMP1,MMP2,IGFBP5,PAPPA2,CTSG,PAPPA
REACTOME_REGULATION_OF_INSULIN_SECRETION	-0.356048	-0.838201	0.825605	1	93	85	SLC2A2,KCNG2,SLC25A6,SLC25A5,PCSK1,GNG13,GNB2,CDX2,PRKAR1B,SLC25A4,STX1A,KCNJ11,ABCC8,ADCY8,GNG4,GNG5,SPCS1,PLCB3,SLC2A1,CACNB3,GNAS,GNA11,SEC11A,GNA15,GNB1,ADCY6,SEC11C,PRKACA,STXBP1,SPCS2,ITPR3,CTNNB1,DPP4,RAPGEF3,PAX6,ISL1,GNA14,PRKAR2A,SPCS3,VAMP2,RAP1B,GNG10,CHRM3,GNAI2,RAP1A,ADRA2A,GNG12,KCNS3,PRKACB,PRKCA,IQGAP1,GNGT1,MARCKS,GNB5,GNAQ,GATA4,GNB3,PRKAR1A,GLP1R,PLCB1,GNG3,GNAI1,PLCB2,CACNB2,…
REACTOME_REGULATION_OF_INSULIN_SECRETION_BY_GLUCAGON_LIKE_PEPTIDE1	-0.44112	-1.00106	0.531513	1	43	42	KCNG2,GNG13,GNB2,PRKAR1B,ADCY8,GNG4,GNG5,GNAS,GNB1,ADCY6,PRKACA,ITPR3,RAPGEF3,PRKAR2A,RAP1B,GNG10,RAP1A,GNG12,KCNS3,PRKACB,IQGAP1,GNGT1,GNB5,GNB3,PRKAR1A,GLP1R,GNG3,AKAP5,KCNC2,RAPGEF4,GNG11,PRKACG,ITPR2,GNG8,PRKAR2B,GNG7,GNGT2,ADCY5,GNG2,GCG,KCNB1,GNB4
REACTOME_REGULATION_OF_KIT_SIGNALING	-0.418156	-0.845795	0.7297	1	17	16	SOCS1,SH2B2,SRC,PTPN6,GRB2,LYN,LCK,KITLG,YES1,SOCS6,PRKCA,SOS1,CBL,KIT,SH2B3,FYN
REACTOME_ADP_SIGNALLING_THROUGH_P2RY1	-0.46597	-1.0022	0.524272	1	25	25	GNG13,GNB2,GNG4,GNG5,SRC,GNA11,GNA15,GNB1,MAPK14,GNA14,PLA2G4A,GNG10,GNG12,GNGT1,GNB5,GNAQ,GNB3,GNG3,P2RY1,GNG11,GNG8,GNG7,GNGT2,GNG2,GNB4
REACTOME_ADHERENS_JUNCTIONS_INTERACTIONS	-0.63109	-1.31084	0.0931744	1	27	18	CDH15,CDH24,CDH3,JUP,PVR,CTNNA1,CTNNB1,CDH1,CTNND1,CADM2,CDH9,CDH13,CDH5,CDH4,CDH11,CADM1,CDH2,CDH6
REACTOME_PROTEOLYTIC_CLEAVAGE_OF_SNARE_COMPLEX_PROTEINS	-0.355688	-0.714266	0.853846	1	17	16	STX10,STX1A,STX1B,STX5,STX8,STX4,STX3,STX16,STX6,VAMP2,VAMP1,STX12,STX7,STX2,STX11,SNAP25
REACTOME_RAS_ACTIVATION_UOPN_CA2_INFUX_THROUGH_NMDA_RECEPTOR	-0.511697	-1.04615	0.452301	1	17	16	GRIN2C,RASGRF1,HRAS,GRIN2D,GRIN1,CALM3,CALM2,NEFL,CALM1,CAMK2D,AKAP9,ACTN2,RASGRF2,GRIN2B,CAMK2B,CAMK2A
REACTOME_SIGNALING_BY_FGFR	-0.404351	-0.95313	0.644289	1	112	105	FGF6,UBA52,MLST8,TRIB3,FGFR4,HRAS,MAP2K2,RPS6KB2,FGF19,RPS27A,PRKAR1B,PPP2R1A,MAPK3,AKT1S1,BAD,ADCY8,CDKN1A,AKT2,FGFR3,SPRY2,FRS3,CDK1,AKT1,GSK3A,TSC2,CALM3,SRC,THEM4,PRKCD,CALM2,PPP2CA,ADCY3,MAPKAP1,CASP9,CALM1,RAF1,ADCY6,PRKACA,ITPR3,PPP2CB,FGF18,MKNK1,FGF3,NR4A1,YWHAB,PHLPP1,PLCG1,GRB2,FGF17,CDKN1B,PRKCG,PRKAR2A,MAP2K1,FOXO4,NRAS,IL17RD,SHC1,MDM2,MTOR,MAPK1,CHUK,PRKCE,ADCY9,ADCY2,FGF23,PDPK1,F…
REACTOME_RORA_ACTIVATES_CIRCADIAN_EXPRESSION	-0.450222	-0.949974	0.59086	1	24	22	SREBF1,NPAS2,HDAC3,NR1D1,RXRA,CPT1A,TGS1,TBL1X,PPARA,NCOA6,SMARCD3,PPARGC1A,TBL1XR1,CREBBP,ARNTL,NCOR1,CLOCK,NCOA1,MED1,NCOA2,NCOA3,RORA
REACTOME_THROMBIN_SIGNALLING_THROUGH_PROTEINASE_ACTIVATED_RECEPTORS_PARS	-0.348242	-0.764089	0.851109	1	32	32	F2,GNG13,GNB2,MAPK3,GNG4,GNG5,SRC,GNA11,GNA15,GNB1,ARRB1,ARRB2,GNA14,MAPK1,GNG10,GNA12,GNG12,GNGT1,GNB5,GNAQ,GNA13,GNB3,GNG3,F2RL3,GNG11,F2RL2,GNG8,F2R,GNG7,GNGT2,GNG2,GNB4
REACTOME_THE_ROLE_OF_NEF_IN_HIV1_REPLICATION_AND_DISEASE_PATHOGENESIS	-0.442483	-0.941495	0.61828	1	28	26	AP1S1,AP2S1,AP1M2,HLA-A,AP2A1,AP2A2,AP1M1,AP2M1,AP1B1,RAC1,ATP6V1H,AP2B1,B2M,PACS1,CD8B,PAK2,LCK,AP1G1,AP1S2,CD247,ELMO1,FYN,HCK,CD4,DOCK2,CD28
REACTOME_TGF_BETA_RECEPTOR_SIGNALING_ACTIVATES_SMADS	-0.275037	-0.579155	0.964208	1	26	23	UBA52,STUB1,RPS27A,PPP1CA,STRAP,FURIN,PPP1CC,UCHL5,PPP1R15A,MTMR4,PPP1CB,XPO1,SMAD3,PMEPA1,SMURF1,SMAD4,SMURF2,SMAD7,ZFYVE9,TGFB1,TGFBR2,SMAD2,TGFBR1
REACTOME_TERMINATION_OF_O_GLYCAN_BIOSYNTHESIS	-0.386518	-0.796603	0.779493	1	24	19	MUCL1,ST6GALNAC4,MUC12,MUC5AC,MUC5B,MUC6,ST6GALNAC2,MUC13,MUC17,ST3GAL3,MUC4,ST6GAL1,ST3GAL2,MUC7,MUC15,ST3GAL1,ST6GALNAC3,MUC21,MUC16
REACTOME_TCR_SIGNALING	-0.4591	-1.04401	0.43279	1	54	50	PIK3R2,CSK,UBE2N,VASP,RELA,RIPK2,PAK1,IKBKB,PLCG1,BCL10,NFKBIA,CARD11,CD3D,IKBKG,ZAP70,NCK1,CHUK,MAP3K7,PAK2,LCK,PRKCQ,LAT,PDPK1,PIK3CB,TAB2,TRAF6,PIK3R1,PTEN,ENAH,HLA-DRB1,MALT1,CD3E,HLA-DRB5,CD247,HLA-DPB1,PIK3CA,PAG1,HLA-DPA1,WAS,HLA-DQA2,CD3G,EVL,CD4,GRAP2,HLA-DQA1,LCP2,FYB,PTPRC,TRAT1,ITK
REACTOME_ACTIVATED_TLR4_SIGNALLING	-0.317438	-0.746462	0.928643	1	93	87	SAA1,UBA52,ECSIT,MAP2K2,SIGIRR,RPS27A,PPP2R1A,NFKBIB,MAPK3,MAPKAPK3,RPS6KA1,IRF3,MAP2K3,IKBKE,CDK1,TAB1,UBE2N,IRF7,PPP2R5D,TICAM1,AGER,ELK1,PPP2CA,MAPK7,PELI3,DUSP6,RELA,MYD88,JUN,MAP2K7,RIPK2,MAPK9,MAPKAPK2,DUSP7,MAP2K6,PPP2CB,IKBKB,IRAK4,HMGB1,NFKB2,DUSP4,MAPK14,PPP2R1B,TRAF3,ATF1,NFKBIA,APP,RIPK1,TIRAP,IKBKG,MAP2K1,DUSP3,FOS,RPS6KA3,MAP2K4,MAPK8,MAPK1,CHUK,MAP3K7,TAB3,TLR3,PELI1,TBK1,NOD1,TLR4…
REACTOME_TAK1_ACTIVATES_NFKB_BY_PHOSPHORYLATION_AND_ACTIVATION_OF_IKKS_COMPLEX	-0.259144	-0.535611	0.972885	1	23	22	SAA1,NFKBIB,TAB1,AGER,RELA,RIPK2,IKBKB,HMGB1,NFKB2,NFKBIA,APP,IKBKG,CHUK,MAP3K7,TAB3,NOD1,TAB2,TRAF6,IRAK2,NOD2,S100B,S100A12
REACTOME_SYNTHESIS_OF_PIPS_AT_THE_PLASMA_MEMBRANE	-0.406758	-0.884725	0.709609	1	31	30	PIK3R2,INPP5J,MTMR14,INPP5K,INPPL1,PIP5K1B,PI4K2B,MTMR1,PIK3C2B,PIP5K1C,PI4K2A,PIP4K2B,PIK3R3,SYNJ2,MTMR6,PIK3CB,MTM1,MTMR3,PIK3R1,PTEN,INPP4B,SYNJ1,PIK3C2A,PIP4K2A,PIK3CA,PIK3CD,PIK3R6,PIK3C2G,PIK3R5,PIK3CG
REACTOME_SYNTHESIS_OF_PIPS_AT_THE_GOLGI_MEMBRANE	-0.391474	-0.77904	0.809152	1	17	15	INPP5E,VAC14,PI4KB,ARF3,PI4K2B,OCRL,FIG4,PI4K2A,SACM1L,PI4KA,PIK3R4,PIK3C3,PIK3C2A,PIKFYVE,PIK3C2G
REACTOME_SYNTHESIS_OF_PC	-0.262413	-0.532194	0.968715	1	18	17	PEMT,CHKA,SLC44A4,SLC44A3,CHPT1,LPIN3,CHKB,SLC44A2,SLC44A1,PHOSPHO1,ACHE,SLC44A5,CEPT1,PCYT1A,LPIN1,LPIN2,PCYT1B
REACTOME_SYNTHESIS_OF_PA	-0.225399	-0.480477	0.992505	1	27	24	PLA2G4D,PLA2G1B,AGPAT2,PLA2G10,GPD1,PLA2G2E,LPCAT4,AGPAT5,AGPAT3,GNPAT,PLA2G12A,PLA2G2A,GPAT2,GPD1L,PLD2,LPCAT1,LCLAT1,PLA2G4A,GPAM,PLD1,PLA2G2F,AGPAT4,PLA2G2D,PLA2G5
REACTOME_ACTIVATION_OF_BH3_ONLY_PROTEINS	-0.205875	-0.411394	0.997738	1	17	15	BID,E2F1,BAD,TP53,DYNLL1,AKT1,TFDP1,DYNLL2,YWHAB,PPP3R1,MAPK8,PMAIP1,BCL2L11,BMF,BCL2
REACTOME_ACTIVATION_OF_KAINATE_RECEPTORS_UPON_GLUTAMATE_BINDING	-0.548989	-1.19475	0.191313	1	31	30	GNG13,GNB2,GNG4,GNG5,PLCB3,CALM3,DLG3,CALM2,CALM1,GNB1,GNG10,DLG1,GNG12,NCALD,GNGT1,GNB5,GNB3,PLCB1,GNG3,PLCB2,GNG11,GRIK4,GNG8,GNG7,GNGT2,GNG2,GNB4,GRIK5,GRIK2,GRIK1
REACTOME_STRIATED_MUSCLE_CONTRACTION	-0.481108	-1.01633	0.48666	1	27	24	TCAP,TNNI3,TNNC2,TNNC1,MYL2,TNNI1,TNNI2,MYBPC1,TPM3,MYL3,MYL4,TNNT1,TPM1,TPM4,TPM2,DMD,ACTN2,DES,TNNT2,VIM,MYH3,TMOD1,MYBPC2,NEB
REACTOME_SPHINGOLIPID_METABOLISM	-0.221187	-0.512323	0.992893	1	69	59	ARSH,DEGS2,GAL3ST1,ARSE,NEU4,SMPD2,NEU1,SPHK2,SUMF2,CSNK1G2,GLA,GBA2,GLB1,SMPD3,HEXB,SUMF1,CTSA,ARSA,SMPD4,GBA,CERS2,CERS5,VAPB,SMPD1,SPTLC1,VAPA,SGPP2,NEU3,HEXA,ASAH1,OSBP,ARSK,CERK,SGPL1,ARSG,SPTLC2,PSAP,CERS4,GALC,ACER3,STS,ACER2,SGMS1,GM2A,DEGS1,ARSJ,KDSR,SGPP1,COL4A3BP,CERS6,ENPP7,SPHK1,UGCG,PPM1L,GBA3,ARSB,SGMS2,ARSI,PRKD1
REACTOME_THROMBOXANE_SIGNALLING_THROUGH_TP_RECEPTOR	-0.502438	-1.08209	0.381466	1	23	23	GNG13,GNB2,GNG4,GNG5,GNA11,GNA15,GNB1,GNA14,GNG10,GNG12,GNGT1,GNB5,GNAQ,GNA13,GNB3,GNG3,TBXA2R,GNG11,GNG8,GNG7,GNGT2,GNG2,GNB4
REACTOME_TIE2_SIGNALING	-0.362406	-0.725752	0.865471	1	17	16	PIK3R2,HRAS,GRB7,GRB14,GRB2,NRAS,SHC1,PIK3CB,KRAS,PIK3R1,SOS1,PIK3CA,DOK2,ANGPT2,TEK,ANGPT1
REACTOME_TIGHT_JUNCTION_INTERACTIONS	-0.41349	-0.871696	0.717557	1	29	24	CLDN3,CLDN14,CRB3,PARD6A,CLDN2,CLDN10,CLDN4,CLDN7,CLDN9,CLDN15,F11R,CLDN12,PARD3,PARD6B,CLDN1,CLDN16,CLDN5,PRKCI,MPP5,CLDN8,PARD6G,CLDN18,CLDN20,CLDN6
REACTOME_TOLL_RECEPTOR_CASCADES	-0.350615	-0.832929	0.856713	1	118	106	LBP,SAA1,UBA52,ECSIT,MAP2K2,SIGIRR,RPS27A,UNC93B1,PPP2R1A,NFKBIB,MAPK3,MAPKAPK3,RPS6KA1,CNPY3,IRF3,DNM2,MAP2K3,IKBKE,CDK1,TAB1,UBE2N,IRF7,PPP2R5D,TICAM1,AGER,ELK1,PPP2CA,MAPK7,PELI3,DUSP6,RELA,MYD88,JUN,MAP2K7,RIPK2,MAPK9,MAPKAPK2,DUSP7,MAP2K6,PPP2CB,IKBKB,LGMN,IRAK4,HMGB1,NFKB2,DUSP4,MAPK14,DNM1,PPP2R1B,TRAF3,ATF1,NFKBIA,APP,RIPK1,TIRAP,IKBKG,MAP2K1,DUSP3,FOS,CTSS,RPS6KA3,MAP2K4,MAPK8,MAPK1,CHUK…
REACTOME_ACTIVATED_AMPK_STIMULATES_FATTY_ACID_OXIDATION_IN_MUSCLE	-0.431798	-0.8703	0.713161	1	19	17	STK11,PRKAB1,PRKAG1,CPT1B,SLC25A20,CAB39L,CPT2,CPT1A,STRADB,PRKAG2,STRADA,ACACB,CAB39,PRKAA1,PRKAB2,ACSL1,PRKAA2
REACTOME_TRIGLYCERIDE_BIOSYNTHESIS	-0.365353	-0.804504	0.811241	1	38	32	AGPAT2,SLC25A1,GPD1,LPCAT4,DGAT2,FASN,AGPAT5,LPIN3,HSD17B12,ACSL5,ELOVL6,AGPAT3,GPAT2,GPD1L,ACSL6,LPCAT1,ACACA,ACLY,ELOVL7,LCLAT1,ACSL3,GK,GPAM,LPIN1,LPIN2,ELOVL5,ACSL1,ACSL4,AGPAT4,ELOVL3,ELOVL2,ELOVL4
REACTOME_TRIF_MEDIATED_TLR3_SIGNALING	-0.259146	-0.60215	0.986922	1	74	71	SAA1,UBA52,MAP2K2,RPS27A,PPP2R1A,NFKBIB,MAPK3,MAPKAPK3,RPS6KA1,IRF3,MAP2K3,IKBKE,CDK1,TAB1,IRF7,PPP2R5D,TICAM1,AGER,RIPK3,ELK1,PPP2CA,MAPK7,DUSP6,RELA,JUN,MAP2K7,RIPK2,MAPK9,MAPKAPK2,DUSP7,MAP2K6,PPP2CB,IKBKB,HMGB1,NFKB2,DUSP4,MAPK14,PPP2R1B,ATF1,NFKBIA,APP,RIPK1,IKBKG,MAP2K1,DUSP3,FOS,RPS6KA3,MAP2K4,MAPK8,MAPK1,CHUK,MAP3K7,TAB3,TLR3,TBK1,NOD1,ATF2,TAB2,TRAF6,IRAK2,NOD2,RPS6KA2,MAPK11,CREB1,ZBP1,…
REACTOME_TRANSPORT_TO_THE_GOLGI_AND_SUBSEQUENT_MODIFICATION	-0.414249	-0.899194	0.678685	1	33	31	MGAT4B,SEC13,B4GALT2,B4GALT3,PREB,MGAT2,SAR1B,MGAT1,B4GALT4,FUT8,ST6GAL1,SEC24B,SEC24C,MGAT5,B4GALT1,B4GALT5,B4GALT6,MCFD2,SEC31A,MANEA,SEC24D,MGAT4A,MAN2A1,SEC23A,MGAT3,LMAN1,MAN1A2,ST8SIA6,MAN1A1,MAN1C1,ST8SIA2
REACTOME_ACTIVATED_NOTCH1_TRANSMITS_SIGNAL_TO_THE_NUCLEUS	-0.433859	-0.926573	0.620541	1	27	24	DLK1,UBA52,MIB2,RPS27A,DTX2,JAG2,PSENEN,PSEN2,APH1A,NCSTN,DLL4,ARRB1,DTX4,ARRB2,JAG1,DLL1,PSEN1,APH1B,DTX1,ADAM10,ADAM17,MIB1,DNER,CNTN1
REACTOME_TRANSPORT_OF_MATURE_TRANSCRIPT_TO_CYTOPLASM	-0.270794	-0.618866	0.968303	1	54	49	AAAS,SRSF9,MAGOH,NUP85,NUP37,SRSF7,U2AF2,SLBP,RNPS1,RAE1,CPSF3,NUP93,SRSF3,NUP43,NUP88,NUP188,SEH1L,NUP62,NUP35,NUPL2,SRSF6,NCBP2,NUP107,NXF1,NUP210,SRSF4,NUP54,DHX38,RBM8A,NUP214,NCBP1,NUP155,SRSF5,UPF3B,EIF4E,SRSF1,NUP133,NFX1,NUP205,CPSF2,SRRM1,POM121,SRSF11,NUP50,TPR,NUP153,CDC40,RANBP2,U2AF1
REACTOME_TRANSPORT_OF_INORGANIC_CATIONS_ANIONS_AND_AMINO_ACIDS_OLIGOPEPTIDES	-0.441217	-1.03402	0.451972	1	94	76	SLC38A3,SLC25A10,SLC38A5,SLC17A1,SLC7A9,SLC1A7,SLC34A3,SLC1A5,SLC7A5,SLC43A1,SLC38A4,SLC3A2,SLC6A20,SLC3A1,SLC26A1,SLC4A2,SLC12A7,SLC43A2,SLC6A19,SLC7A8,SLC9A1,SLC1A4,SLC20A2,SLC9A3,SLC7A1,SLC6A18,SLC15A4,SLC6A12,SLC15A1,SLC9A8,SLC9A2,SLC12A2,SLC9A7,SLC17A5,SLC9A6,SLC7A6,SLC1A1,SLC24A1,SLC20A1,SLC38A1,SLC8A2,SLC1A2,SLC9A5,SLC6A14,SLC12A4,SLC7A11,SLC38A2,SLC7A7,SLC15A3,SLC6A6,SLC36A1,SLC26A3,SLC26…
REACTOME_SPHINGOLIPID_DE_NOVO_BIOSYNTHESIS	-0.344203	-0.740634	0.848712	1	31	25	DEGS2,SPHK2,CSNK1G2,CERS2,CERS5,VAPB,SPTLC1,VAPA,SGPP2,OSBP,SGPL1,SPTLC2,CERS4,ACER3,ACER2,SGMS1,DEGS1,KDSR,SGPP1,COL4A3BP,CERS6,SPHK1,PPM1L,SGMS2,PRKD1
REACTOME_TRANSMISSION_ACROSS_CHEMICAL_SYNAPSES	-0.495584	-1.18596	0.0661323	1	186	155	CHRNA6,GRIN2C,RASGRF1,GABRA4,HRAS,KCNJ9,GNG13,AP2S1,GNB2,GRIN2D,SLC1A7,PICK1,KCNJ12,SYN1,RAB3A,STX1A,RRAS,RPS6KA1,CACNA1B,ADCY8,GNG4,GNG5,SYN3,ALDH2,PLCB3,GAD1,AP2A1,AP2A2,CAMKK1,AP2M1,CACNB3,GRIN1,CALM3,DLG3,HSPA8,CALM2,MAOA,DNAJC5,ADCY3,CHRNA5,NEFL,ARHGEF9,CALM1,GNB1,AP2B1,RAF1,ADCY6,STXBP1,NSF,GABRR1,UNC13B,SYN2,SYT1,CACNB1,SLC6A12,ALDH5A1,KCNJ3,GLS2,GABRB1,EPB41L1,CACNG4,ACHE,PRKCG,GABBR1,RPS…
REACTOME_ACTIVATED_TAK1_MEDIATES_P38_MAPK_ACTIVATION	-0.362132	-0.734475	0.846591	1	18	16	MAPKAPK3,MAP2K3,TAB1,RIPK2,MAPKAPK2,MAP2K6,MAPK14,IKBKG,MAP3K7,TAB3,NOD1,TAB2,TRAF6,IRAK2,NOD2,MAPK11
REACTOME_TRANSCRIPTIONAL_REGULATION_OF_WHITE_ADIPOCYTE_DIFFERENTIATION	-0.474983	-1.08866	0.328615	1	72	66	MED16,CEBPB,MED27,CEBPD,CDK4,MED18,SREBF1,MED19,MED11,MED30,PPARG,MED10,HDAC3,MED8,MED26,MED31,RXRA,CCND3,MED9,MED15,MED22,CDK8,MED29,KLF4,MED7,NCOR2,MED4,RELA,MED21,CCNC,MED20,MED6,SLC2A4,TGS1,PCK1,KLF5,MED12,TBL1X,MED17,PPARA,MED14,NCOA6,SMARCD3,PPARGC1A,TBL1XR1,MED23,CREBBP,TGFB1,NCOR1,CDK19,NCOA1,WNT10B,MED1,NCOA2,NCOA3,LPL,MED13L,ANGPTL4,TNF,EGR2,WNT1,CD36,EBF1,FABP4,PLIN1,ADIPOQ
REACTOME_TRANSCRIPTIONAL_ACTIVITY_OF_SMAD2_SMAD3_SMAD4_HETEROTRIMER	-0.395849	-0.872657	0.729211	1	38	35	UBA52,RPS27A,E2F4,MEN1,HDAC1,JUNB,MYC,TGIF1,TFDP1,CDK8,NCOR2,E2F5,CCNC,UBE2D3,TGIF2,PARP1,SKI,PPM1A,UBE2D1,SMAD3,RBL1,SP1,CCNT1,SMAD4,CCNT2,SMURF2,USP9X,SMAD7,NCOR1,SMAD2,TRIM33,SKIL,CDKN2B,WWTR1,SERPINE1
REACTOME_TRAFFICKING_OF_AMPA_RECEPTORS	-0.453092	-0.945189	0.611661	1	28	21	AP2S1,PICK1,AP2A1,AP2A2,AP2M1,AP2B1,NSF,EPB41L1,CACNG4,PRKCG,MDM2,CAMK2D,MYO6,DLG1,PRKCA,GRIP2,AKAP5,GRIA1,CAMK2B,PRKCB,CAMK2A
REACTOME_TRAF6_MEDIATED_NFKB_ACTIVATION	-0.219942	-0.453228	0.992316	1	21	20	SAA1,NFKBIB,TRAF2,RNF135,AGER,RELA,MAVS,IKBKB,HMGB1,NFKB2,NFKBIA,APP,IKBKG,CHUK,TRAF6,IFIH1,DDX58,MAP3K1,S100B,S100A12
REACTOME_TRAF6_MEDIATED_IRF7_ACTIVATION	-0.317443	-0.625719	0.935811	1	30	15	IRF3,TRAF2,RNF135,IKBKE,IRF7,MAVS,IRF2,IRF1,SIKE1,TANK,TBK1,CREBBP,TRAF6,IFIH1,DDX58
REACTOME_TRAF6_MEDIATED_INDUCTION_OF_NFKB_AND_MAP_KINASES_UPON_TLR7_8_OR_9_ACTIVATION	-0.297477	-0.696142	0.949341	1	77	72	SAA1,UBA52,ECSIT,MAP2K2,RPS27A,PPP2R1A,NFKBIB,MAPK3,MAPKAPK3,RPS6KA1,MAP2K3,CDK1,TAB1,UBE2N,PPP2R5D,AGER,ELK1,PPP2CA,MAPK7,PELI3,DUSP6,RELA,MYD88,JUN,MAP2K7,RIPK2,MAPK9,MAPKAPK2,DUSP7,MAP2K6,PPP2CB,IKBKB,IRAK4,HMGB1,NFKB2,DUSP4,MAPK14,PPP2R1B,ATF1,NFKBIA,APP,IKBKG,MAP2K1,DUSP3,FOS,RPS6KA3,MAP2K4,MAPK8,MAPK1,CHUK,MAP3K7,TAB3,PELI1,NOD1,ATF2,TAB2,TRAF6,IRAK2,NOD2,RPS6KA2,MAPK11,CREB1,MAP3K1,S100B,M…
REACTOME_TRANSMEMBRANE_TRANSPORT_OF_SMALL_MOLECULES	-0.269037	-0.656647	0.999	1	413	352	ALB,SLC22A7,G6PC,APOA1,TF,SLC2A2,SLC22A1,SLC28A1,GCKR,SLC13A5,FXYD2,SLCO1B1,SLC38A3,SLC5A2,ATP2B2,SLC39A4,SLC25A10,SLC39A3,SLC38A5,SLC22A18,ATP6V0B,SLC2A8,GABRA4,SLC17A1,SLC30A2,SLC39A2,GNG13,GNB2,SLC7A9,RHCG,ABCA4,ATP6V1F,SLC18A1,SLC39A5,SLC28A2,G6PC3,PRKAR1B,ATP2A1,SLC22A11,SLC1A7,SLC34A3,ABCG8,SLC1A5,SLC27A4,SLC7A5,HMOX2,SLC29A2,SLC43A1,FTH1,ABCA12,SLC6A7,ABCB6,ATP6V0D1,SLC5A6,SLC38A4,TCIRG1,A…
REACTOME_RIP_MEDIATED_NFKB_ACTIVATION_VIA_DAI	-0.222968	-0.456725	0.987832	1	18	18	SAA1,NFKBIB,TICAM1,AGER,RIPK3,RELA,IKBKB,HMGB1,NFKB2,NFKBIA,APP,RIPK1,IKBKG,CHUK,TLR3,ZBP1,S100B,S100A12
REACTOME_SMOOTH_MUSCLE_CONTRACTION	-0.601763	-1.25658	0.120783	1	25	22	MYL6,MYL6B,MYL12B,CALM3,SORBS3,CALM2,CALM1,TPM3,ITGB5,TPM1,TPM4,VCL,TPM2,ACTG2,MYL9,SORBS1,ITGA1,ACTA2,LMOD1,MYLK,CALD1,MYH11
REACTOME_ACTIVATION_OF_NMDA_RECEPTOR_UPON_GLUTAMATE_BINDING_AND_POSTSYNAPTIC_EVENTS	-0.447361	-0.981245	0.541535	1	37	33	GRIN2C,RASGRF1,HRAS,GRIN2D,RRAS,RPS6KA1,ADCY8,CAMKK1,GRIN1,CALM3,CALM2,ADCY3,NEFL,CALM1,RAF1,RPS6KA6,RPS6KA3,MAPK1,CAMK2D,PDPK1,PRKACB,RPS6KA2,ADCY1,BRAF,CREB1,AKAP9,ACTN2,GRIA1,RASGRF2,GRIN2B,CAMK2B,CAMK2A,CAMK4
REACTOME_SIGNALING_BY_FGFR1_MUTANTS	-0.420056	-0.901076	0.674595	1	30	28	FGF6,BCR,CUX1,TRIM24,PLCG1,FGFR1OP,STAT5A,GRB2,FGF17,CPSF6,STAT5B,FGFR1OP2,STAT3,MYO18A,GAB2,FGF23,FGF20,PIK3R1,ZMYM2,CNTRL,STAT1,FGF9,PIK3CA,FGF4,FGFR1,FGF8,FGF2,FGF1
REACTOME_SIGNALING_BY_FGFR1_FUSION_MUTANTS	-0.471306	-0.972396	0.556769	1	19	18	BCR,CUX1,TRIM24,PLCG1,FGFR1OP,STAT5A,GRB2,CPSF6,STAT5B,FGFR1OP2,STAT3,MYO18A,GAB2,PIK3R1,ZMYM2,CNTRL,STAT1,PIK3CA
REACTOME_SIGNALING_BY_ERBB4	-0.349346	-0.82032	0.850806	1	90	82	UBA52,MLST8,TRIB3,HRAS,MAP2K2,RPS6KB2,EGF,RPS27A,MAPK3,RBX1,AKT1S1,BAD,CDKN1A,PSENEN,PSEN2,AKT2,APH1A,CDK1,AKT1,SH2B1,GSK3A,TSC2,THEM4,MAPKAP1,SKP1,CASP9,CUL1,NCSTN,RAF1,BTC,ERBB3,WWOX,NR4A1,YWHAB,PHLPP1,HBEGF,STAT5A,GRB2,PSEN1,CDKN1B,BTRC,MAP2K1,FOXO4,NRG4,NRAS,SHC1,MDM2,MTOR,MAPK1,STAT5B,EREG,PRLR,WWP1,CHUK,APH1B,YAP1,PDPK1,TAB2,KRAS,PIK3R1,PTEN,ADAM17,FOXO3,NCOR1,NEDD4,EGFR,CREB1,SOS1,S100B,GH…
REACTOME_SIGNALING_BY_ERBB2	-0.354263	-0.833853	0.84654	1	101	94	UBA52,MLST8,TRIB3,HRAS,MAP2K2,RPS6KB2,STUB1,EGF,RPS27A,PRKAR1B,MAPK3,AKT1S1,BAD,ERBB2,ADCY8,CDKN1A,AKT2,GRB7,CDK1,RNF41,AKT1,GSK3A,TSC2,CALM3,SRC,THEM4,PRKCD,CALM2,ADCY3,MAPKAP1,CASP9,CALM1,RAF1,ADCY6,PRKACA,BTC,ITPR3,ERBB3,NR4A1,YWHAB,PHLPP1,HBEGF,PLCG1,HSP90AA1,GRB2,CDKN1B,PRKCG,PRKAR2A,MAP2K1,FOXO4,NRG4,NRAS,SHC1,MDM2,MTOR,MAPK1,EREG,CHUK,PRKCE,ADCY9,ADCY2,PDPK1,PRKACB,KRAS,YES1,USP8,PRKCA,PIK…
REACTOME_SIGNALING_BY_EGFR_IN_CANCER	-0.320517	-0.758142	0.919436	1	109	103	UBA52,SH3GL2,MLST8,TRIB3,HRAS,AP2S1,MAP2K2,RPS6KB2,EGF,RPS27A,PRKAR1B,CLTA,EPN1,MAPK3,AKT1S1,BAD,ADCY8,CDKN1A,AKT2,CSK,SPRY2,HGS,AP2A1,AP2A2,CDK1,AKT1,GSK3A,AP2M1,TSC2,CALM3,SRC,THEM4,PRKCD,CALM2,ADCY3,MAPKAP1,CASP9,CALM1,EPS15L1,AP2B1,RAF1,ADCY6,PRKACA,ITPR3,SH3KBP1,CDC42,NR4A1,YWHAB,PHLPP1,PLCG1,HSP90AA1,GRB2,STAM,CDKN1B,PRKCG,PRKAR2A,MAP2K1,FOXO4,NRAS,CLTC,SHC1,MDM2,MTOR,MAPK1,LRIG1,CHUK,SPRY1…
REACTOME_SIGNALING_BY_CONSTITUTIVELY_ACTIVE_EGFR	-0.259294	-0.529146	0.981278	1	18	16	UBA52,HRAS,EGF,RPS27A,PLCG1,HSP90AA1,GRB2,NRAS,SHC1,KRAS,PIK3R1,GAB1,EGFR,SOS1,CBL,PIK3CA
REACTOME_SIGNALING_BY_BMP	-0.551609	-1.15199	0.267819	1	23	21	SMAD6,UBE2D3,SKI,UBE2D1,BMP2,ACVR2A,SMURF1,BMPR1A,SMAD4,ACVR2B,SMAD1,BMPR1B,SMURF2,SMAD7,SMAD5,ZFYVE16,BMPR2,GREM2,NOG,CHRDL1,CER1
REACTOME_SHC_RELATED_EVENTS	-0.251604	-0.513521	0.980176	1	17	17	HRAS,MAP2K2,MAPK3,CDK1,SHC2,RAF1,YWHAB,GRB2,MAP2K1,NRAS,SHC1,MAPK1,INSR,KRAS,SHC3,SOS1,INS
REACTOME_SHC_MEDIATED_CASCADE	-0.51295	-1.09286	0.352052	1	28	26	FGF6,FGFR4,HRAS,FGF19,FGFR3,FGF18,FGF3,GRB2,FGF17,NRAS,SHC1,FGF23,FGF20,KRAS,KL,SOS1,FGFR2,FGF9,FGF4,FGFR1,FGF8,KLB,FGF2,FGF7,FGF1,FGF10
REACTOME_SHC1_EVENTS_IN_ERBB4_SIGNALING	-0.282714	-0.582175	0.951648	1	20	19	HRAS,MAP2K2,MAPK3,CDK1,RAF1,BTC,YWHAB,HBEGF,GRB2,MAP2K1,NRG4,NRAS,SHC1,MAPK1,EREG,KRAS,SOS1,NRG2,NRG1
REACTOME_SEMAPHORIN_INTERACTIONS	-0.461329	-1.07387	0.361702	1	68	64	CDK5,MYL6,RHOG,RRAS,ERBB2,RHOC,CFL1,MYL12B,PLXNB1,PLXNA3,MYH14,LIMK1,RAC1,RND1,RHOA,RHOB,PAK1,HSP90AB1,PLXNA1,SEMA4D,PLXNA2,CDC42,LIMK2,PIP5K1C,CDK5R1,RAC2,HSP90AA1,ARHGEF11,MET,ARHGAP35,FARP2,PLXNB3,SEMA4A,PAK2,ROCK1P1,DPYSL2,SEMA6A,SEMA5A,FES,TYROBP,MYH9,ROCK2,SEMA3A,PLXND1,ARHGEF12,SEMA7A,ITGB1,SEMA6D,ROCK1,FYN,CD72,MYL9,ITGA1,TREM2,SEMA3E,CRMP1,MYH10,DPYSL3,NRP1,MYH11,PLXNC1,PTPRC,DPYSL4,DPYS…
REACTOME_SEMA4D_IN_SEMAPHORIN_SIGNALING	-0.407945	-0.890093	0.684155	1	32	30	MYL6,RHOG,RRAS,ERBB2,RHOC,MYL12B,PLXNB1,MYH14,LIMK1,RAC1,RND1,RHOA,RHOB,SEMA4D,CDC42,LIMK2,RAC2,ARHGEF11,MET,ARHGAP35,ROCK1P1,MYH9,ROCK2,ARHGEF12,ROCK1,CD72,MYL9,MYH10,MYH11,PTPRC
REACTOME_SEMA4D_INDUCED_CELL_MIGRATION_AND_GROWTH_CONE_COLLAPSE	-0.385761	-0.823647	0.765864	1	27	25	MYL6,RHOG,ERBB2,RHOC,MYL12B,PLXNB1,MYH14,LIMK1,RAC1,RND1,RHOA,RHOB,SEMA4D,CDC42,LIMK2,RAC2,ARHGEF11,ROCK1P1,MYH9,ROCK2,ARHGEF12,ROCK1,MYL9,MYH10,MYH11
REACTOME_ACYL_CHAIN_REMODELLING_OF_PC	-0.228213	-0.486374	0.989933	1	22	22	PLA2G4D,PLA2G1B,PLA2G10,PLA2G4F,PLA2G2E,LPCAT4,PLA2G3,PLA2G6,PLA2G16,PLBD1,PLA2G12A,PLA2G2A,LPCAT1,LPCAT3,PLA2G4A,PNPLA8,LPCAT2,MBOAT2,PLA2G2F,PLA2G4C,PLA2G2D,PLA2G5
REACTOME_ACYL_CHAIN_REMODELLING_OF_PE	-0.25135	-0.527428	0.980132	1	21	21	PLA2G4D,PLA2G1B,PLA2G10,PLA2G4F,PLA2G2E,LPCAT4,PLA2G3,PLA2G6,PLA2G16,PLBD1,PLA2G12A,MBOAT1,PLA2G2A,LPCAT3,PLA2G4A,PNPLA8,MBOAT2,PLA2G2F,PLA2G4C,PLA2G2D,PLA2G5
REACTOME_SIGNALING_BY_FGFR_IN_DISEASE	-0.380074	-0.905656	0.738477	1	127	119	FGF6,UBA52,MLST8,TRIB3,FGFR4,HRAS,MAP2K2,RPS6KB2,FGF19,RPS27A,PRKAR1B,PPP2R1A,MAPK3,AKT1S1,BAD,ADCY8,CDKN1A,AKT2,FGFR3,SPRY2,FRS3,CDK1,AKT1,GSK3A,TSC2,CALM3,SRC,THEM4,PRKCD,CALM2,BCR,PPP2CA,ADCY3,MAPKAP1,CUX1,CASP9,CALM1,RAF1,ADCY6,PRKACA,TRIM24,ITPR3,PPP2CB,FGF18,MKNK1,FGF3,NR4A1,YWHAB,PHLPP1,PLCG1,FGFR1OP,STAT5A,GRB2,FGF17,CDKN1B,CPSF6,PRKCG,PRKAR2A,MAP2K1,FOXO4,NRAS,IL17RD,SHC1,MDM2,MTOR,MAPK1…
REACTOME_SIGNALING_BY_FGFR_MUTANTS	-0.435409	-0.978197	0.543365	1	44	41	FGF6,FGFR4,HRAS,FGFR3,BCR,CUX1,TRIM24,FGF18,FGF3,PLCG1,FGFR1OP,STAT5A,GRB2,FGF17,CPSF6,NRAS,STAT5B,FGFR1OP2,STAT3,MYO18A,GAB2,FGF23,FGF20,KRAS,PIK3R1,ZMYM2,CNTRL,GAB1,FRS2,SOS1,STAT1,FGFR2,FGF9,PIK3CA,FGF4,FGFR1,FGF8,FGF2,FGF7,FGF1,FGF10
REACTOME_SIGNALING_BY_HIPPO	-0.496165	-1.02035	0.490503	1	22	19	YWHAE,DVL2,WWC1,NPHP4,TJP2,CASP3,YWHAB,MOB1A,YAP1,SAV1,STK3,AMOTL2,STK4,TJP1,LATS1,MOB1B,LATS2,WWTR1,AMOTL1
REACTOME_SIGNALING_BY_ILS	-0.388243	-0.924087	0.692462	1	107	100	PIK3R2,HRAS,MAP2K2,MAPK3,RBX1,CASP1,TNIP2,TOLLIP,IL18,CDK1,TYK2,TAB1,UBE2N,PTPN6,SQSTM1,CSF2,PELI3,SKP1,SYK,INPPL1,CUL1,RELA,MYD88,RAF1,RIPK2,MAP2K6,IL1R2,IL2RG,IKBKB,IRAK4,NFKB2,YWHAB,PTK2B,BLNK,TEC,STAT5A,CRKL,GRB2,YWHAZ,IKBKG,BTRC,MAP2K1,CRK,IL7,NRAS,SHC1,MAP2K4,PIK3R3,MAPK1,STAT5B,LYN,CHUK,MAP3K7,TAB3,STAT3,PELI1,LCK,MAP3K8,GAB2,NOD1,RAPGEF1,PIK3CB,TAB2,TRAF6,IL1A,PRKACB,IRAK2,KRAS,YES1,NOD2,…
REACTOME_SIGNAL_TRANSDUCTION_BY_L1	-0.393328	-0.874327	0.712487	1	34	34	ITGA2B,SH3GL2,AP2S1,MAP2K2,CLTA,MAPK3,RPS6KA4,RPS6KA1,CSNK2B,AP2A1,AP2A2,AP2M1,CSNK2A2,RAC1,AP2B1,PAK1,CSNK2A1,MAP2K1,RPS6KA6,CLTC,RPS6KA3,MAPK1,ITGA9,L1CAM,RPS6KA2,EGFR,ITGB1,RPS6KA5,ITGAV,FGFR1,ITGA5,NRP1,ITGB3,NCAM1
REACTOME_SIGNAL_AMPLIFICATION	-0.502055	-1.08926	0.381565	1	31	30	GNG13,GNB2,GNG4,GNG5,SRC,GNA11,GNA15,GNB1,MAPK14,GNA14,PLA2G4A,GNG10,GNAI2,GNG12,GNGT1,GNB5,GNAQ,GNA13,GNB3,GNG3,TBXA2R,GNAI1,P2RY1,GNG11,GNG8,GNG7,GNGT2,GNG2,GNB4,P2RY12
REACTOME_SIGNALLING_TO_RAS	-0.233478	-0.503583	0.990354	1	27	26	HRAS,MAP2K2,MAPK3,MAPKAPK3,MAPK13,CDK1,SRC,SHC2,RALGDS,RAF1,MAPKAPK2,RALA,YWHAB,MAPK14,GRB2,RALB,MAP2K1,NRAS,MAPK12,SHC1,MAPK1,KRAS,SHC3,MAPK11,SOS1,NGF
REACTOME_SIGNALLING_TO_ERKS	-0.303267	-0.668391	0.932418	1	36	34	HRAS,MAP2K2,MAPK3,MAPKAPK3,MAPK13,CDK1,SRC,SHC2,RALGDS,RAF1,MAPKAPK2,RALA,YWHAB,MAPK14,PLCG1,GRB2,RALB,MAP2K1,CRK,NRAS,MAPK12,SHC1,MAPK1,RAP1A,RIT1,RAPGEF1,KRAS,SHC3,MAPK11,FRS2,BRAF,KIDINS220,SOS1,NGF
REACTOME_SIGNALLING_BY_NGF	-0.308226	-0.73836	0.981	1	217	199	PIK3R2,RASGRF1,UBA52,SH3GL2,MLST8,TRIB3,HRAS,AP2S1,MAP2K2,RPS6KB2,SMPD2,RPS27A,PRKAR1B,CLTA,PPP2R1A,ARHGEF16,MAPK3,AKT1S1,BAD,ARHGAP4,MAPKAPK3,RPS6KA1,ADCY8,CDKN1A,PSENEN,PSEN2,AKT2,NGEF,DNAL4,ARHGDIA,APH1A,DNM2,HDAC3,MAPK13,AP2A1,AP2A2,CDK1,ITGB3BP,HDAC1,AKT1,YWHAE,GSK3A,AP2M1,TSC2,CALM3,AATF,SRC,SQSTM1,THEM4,PPP2R5D,PRKCD,OBSCN,RAC1,CALM2,ELK1,PPP2CA,MAP2K5,ADCY3,MAPK7,MAPKAP1,SHC2,RALGDS,CASP9…
REACTOME_ACTIVATION_OF_THE_PRE_REPLICATIVE_COMPLEX	-0.340268	-0.742714	0.853659	1	31	30	CDT1,CDC45,MCM5,MCM7,RPA3,MCM2,POLA2,ORC6,ORC5,ORC1,POLE2,RPA2,POLE,MCM4,MCM3,PRIM1,CDC6,MCM6,ORC4,DBF4,CDK2,PRIM2,ORC3,RPA1,MCM10,ORC2,CDC7,POLA1,MCM8,RPA4
REACTOME_SIGNALING_BY_THE_B_CELL_RECEPTOR_BCR	-0.275975	-0.656917	0.985986	1	126	117	PSMB3,UBA52,MLST8,TRIB3,HRAS,RPS6KB2,PSMD3,PSMA7,PSMB10,RPS27A,PSMD8,PSMB4,PSMB5,PSMB8,PSMB1,NFKBIB,PSMB7,AKT1S1,PSMB6,PSMC3,PSMD4,BAD,PSMD13,PSMB9,PSMA5,PSMC4,PSMB2,PSME1,CDKN1A,PSMC5,AKT2,PSMF1,PSMD9,PSMD14,PSMA3,AKT1,GSK3A,TSC2,CALM3,PSMD10,PSMA1,PSMA4,THEM4,PSMC2,PSMA2,PSMD2,CALM2,PSMD6,MAPKAP1,NFKBIE,SKP1,PSMA6,CASP9,SYK,PSMC6,CUL1,RELA,CALM1,PSMD11,ITPR3,PSMD12,PSMD7,SH3KBP1,IKBKB,PSMD5,PSM…
REACTOME_SMAD2_SMAD3_SMAD4_HETEROTRIMER_REGULATES_TRANSCRIPTION	-0.404491	-0.866021	0.716115	1	27	24	UBA52,RPS27A,E2F4,MEN1,HDAC1,JUNB,MYC,TGIF1,TFDP1,CDK8,E2F5,CCNC,TGIF2,SMAD3,RBL1,SP1,CCNT1,SMAD4,CCNT2,SMAD7,SMAD2,CDKN2B,WWTR1,SERPINE1
REACTOME_SIGNALING_BY_TGF_BETA_RECEPTOR_COMPLEX	-0.328019	-0.747751	0.900508	1	63	58	UBA52,PARD6A,STUB1,RPS27A,PPP1CA,PRKCZ,E2F4,MEN1,HDAC1,JUNB,MYC,TGIF1,TFDP1,STRAP,CDK8,NCOR2,FURIN,F11R,PPP1CC,E2F5,CCNC,RHOA,UCHL5,UBE2D3,PPP1R15A,TGIF2,MTMR4,PARD3,PARP1,PPP1CB,SKI,CGN,PPM1A,UBE2D1,XPO1,SMAD3,PMEPA1,RBL1,SMURF1,SP1,ARHGEF18,CCNT1,SMAD4,CCNT2,SMURF2,USP9X,SMAD7,ZFYVE9,TGFB1,NCOR1,TGFBR2,SMAD2,TRIM33,SKIL,TGFBR1,CDKN2B,WWTR1,SERPINE1
REACTOME_SIGNALING_BY_ROBO_RECEPTOR	-0.498557	-1.06485	0.401491	1	30	27	PFN1,PAK4,NCK2,VASP,PFN2,RAC1,PAK1,CDC42,CAP1,ABL1,GPC1,NCK1,PAK2,CLASP1,ENAH,SOS2,SRGAP2,ABL2,SOS1,SRGAP1,ROBO3,SRGAP3,ROBO1,ROBO2,CAP2,EVL,SLIT2
REACTOME_SIGNALING_BY_RHO_GTPASES	-0.421006	-0.989422	0.562941	1	113	105	PIK3R2,RASGRF1,ARHGDIG,RHOD,RHOV,RAC3,RHOT2,ARHGEF16,RHOG,ARHGAP4,RHOC,NGEF,ARHGDIA,GDI1,GDI2,DEPDC1B,OBSCN,RACGAP1,RAC1,RHOF,BCR,GMIP,ARHGEF9,ARHGAP40,RHOA,DEPDC7,RHOB,ABR,ARAP3,FGD3,OCRL,FGD1,CDC42,KALRN,ARHGEF4,RHOT1,VAV3,RAC2,ARHGDIB,ARHGEF11,ARHGAP1,RHOBTB2,ARHGAP17,ARHGEF2,RALBP1,ARHGAP35,ARHGAP44,NET1,ARHGAP8,ARAP1,FAM13A,ECT2,ARHGAP26,ARHGEF3,ARHGAP11A,G3BP2,ARHGAP19,MYO9B,ARHGAP18,RHOBTB…
REACTOME_SIGNALING_BY_PDGF	-0.431762	-1.03045	0.419258	1	122	115	PIK3R2,COL2A1,MLST8,TRIB3,HRAS,MAP2K2,RPS6KB2,PRKAR1B,MAPK3,AKT1S1,COL9A2,BAD,ADCY8,CDKN1A,AKT2,GRB7,BCAR1,CDK1,STAT6,AKT1,NCK2,GSK3A,TSC2,CALM3,SRC,THEM4,PRKCD,CALM2,ADCY3,MAPKAP1,CASP9,FURIN,CALM1,RAF1,ADCY6,PRKACA,COL9A3,ITPR3,NR4A1,YWHAB,PHLPP1,PLCG1,STAT5A,CRKL,GRB2,CDKN1B,PRKCG,PRKAR2A,MAP2K1,CRK,FOXO4,NRAS,MDM2,MTOR,NCK1,MAPK1,STAT5B,CHUK,STAT3,PDGFA,PRKCE,THBS3,ADCY9,ADCY2,RAPGEF1,PDPK1,P…
REACTOME_SIGNALING_BY_NOTCH1	-0.325689	-0.750832	0.916241	1	70	65	HES5,DLK1,UBA52,MIB2,HDAC10,RPS27A,DTX2,JAG2,TLE2,RBX1,KAT2A,PSENEN,PSEN2,HES1,APH1A,HDAC11,HDAC3,TLE1,HDAC1,HDAC8,MYC,HDAC6,CDK8,SKP1,NCOR2,CUL1,NCSTN,HDAC5,DLL4,CCNC,ARRB1,HDAC2,DTX4,ARRB2,TBL1X,TLE3,SNW1,JAG1,DLL1,PSEN1,MAML1,HDAC7,HDAC4,APH1B,DTX1,TBL1XR1,MAML3,CREBBP,FBXW7,ADAM10,ADAM17,NCOR1,RBPJ,HEY1,TLE4,MAML2,MIB1,KAT2B,HIF1A,HEYL,DNER,HEY2,MAMLD1,HDAC9,CNTN1
REACTOME_SIGNALING_BY_NOTCH	-0.323055	-0.754964	0.943662	1	103	92	HES5,DLK1,UBA52,MIB2,E2F1,RFNG,HDAC10,RPS27A,ATP2A1,DTX2,JAG2,TLE2,LFNG,RBX1,KAT2A,TP53,PSENEN,PSEN2,HES1,APH1A,HDAC11,HDAC3,TLE1,HDAC1,HDAC8,ATP2A3,MYC,HDAC6,TFDP1,MOV10,CDK8,SKP1,NCOR2,FURIN,CUL1,NCSTN,HDAC5,JUN,DLL4,TMED2,CCNC,ARRB1,HDAC2,DTX4,ARRB2,ST3GAL3,TBL1X,TLE3,POGLUT1,SNW1,JAG1,DLL1,PSEN1,ATP2A2,E2F3,RAB6A,MAML1,B4GALT1,HDAC7,HDAC4,APH1B,DTX1,CCND1,TBL1XR1,MAML3,CREBBP,FBXW7,TNRC6C,ADA…
REACTOME_SIGNALING_BY_NODAL	-0.468222	-0.946298	0.593333	1	18	17	LEFTY2,LEFTY1,TDGF1,DRAP1,ACVR1B,FURIN,FOXH1,NODAL,PCSK6,SMAD3,ACVR2A,ACVR1C,SMAD4,ACVR2B,FOXO3,SMAD2,CER1
REACTOME_SIGNALING_BY_INSULIN_RECEPTOR	-0.301098	-0.705347	0.966934	1	108	100	PIK3R2,FGF6,EIF4EBP1,RPS6,ATP6V0B,MLST8,TRIB3,FGFR4,HRAS,MAP2K2,ATP6V1F,STK11,FGF19,MAPK3,ATP6V0D1,TCIRG1,ATP6V0A4,ATP6V0E1,AKT2,PRKAB1,FGFR3,PRKAG1,DOK1,CDK1,TSC2,THEM4,ATP6V1G1,ATP6V1E1,CAB39L,ATP6V1H,SHC2,ATP6V1E2,STRADB,RHEB,RPTOR,PRKAG2,RAF1,EIF4B,ATP6V1D,FGF18,ATP6V1C2,IRS2,FGF3,YWHAB,EIF4G1,ATP6V0C,ATP6V0A2,EIF4E,GRB2,FGF17,ATP6V1B1,TSC1,GRB10,MAP2K1,CRK,NRAS,SHC1,MTOR,PPM1A,ATP6V1B2,EEF2K…
REACTOME_SIGNALING_BY_SCF_KIT	-0.307543	-0.714056	0.940162	1	78	75	PIK3R2,SOCS1,MLST8,TRIB3,HRAS,SH2B2,MAP2K2,RPS6KB2,MAPK3,AKT1S1,BAD,CDKN1A,AKT2,GRB7,CDK1,AKT1,GSK3A,TSC2,SRC,PTPN6,THEM4,RAC1,MAPKAP1,CASP9,RAF1,CHEK1,NR4A1,YWHAB,PHLPP1,TEC,STAT5A,GRB2,CDKN1B,GRB10,MAP2K1,FOXO4,NRAS,MDM2,MTOR,PIK3R3,MAPK1,STAT5B,LYN,CHUK,STAT3,LCK,GAB2,PDPK1,KRAS,KITLG,FES,YES1,SOCS6,PRKCA,PIK3R1,PTEN,FOXO3,CREB1,SOS1,CBL,STAT1,VAV1,KIT,SH2B3,PIK3CA,FER,FOXO1,JAK2,RICTOR,FYN,GR…
REACTOME_PKA_MEDIATED_PHOSPHORYLATION_OF_CREB	-0.513952	-1.06703	0.426519	1	18	17	PRKAR1B,ADCY8,ADCY3,ADCY6,PRKACA,PRKAR2A,ADCY9,ADCY2,PRKACB,ADCY4,ADCY1,PRKAR1A,ADCY7,CREB1,PRKACG,PRKAR2B,ADCY5
REACTOME_NGF_SIGNALLING_VIA_TRKA_FROM_THE_PLASMA_MEMBRANE	-0.315013	-0.746201	0.94995	1	137	129	PIK3R2,SH3GL2,MLST8,TRIB3,HRAS,AP2S1,MAP2K2,RPS6KB2,PRKAR1B,CLTA,PPP2R1A,MAPK3,AKT1S1,BAD,MAPKAPK3,RPS6KA1,ADCY8,CDKN1A,AKT2,DNAL4,DNM2,MAPK13,AP2A1,AP2A2,CDK1,AKT1,GSK3A,AP2M1,TSC2,CALM3,SRC,THEM4,PPP2R5D,PRKCD,CALM2,ELK1,PPP2CA,MAP2K5,ADCY3,MAPK7,MAPKAP1,SHC2,RALGDS,CASP9,DUSP6,CALM1,AP2B1,RAF1,ADCY6,MAPKAPK2,PRKACA,RHOA,DUSP7,ITPR3,PPP2CB,RALA,IRS2,NR4A1,YWHAB,DUSP4,MAPK14,PHLPP1,PLCG1,DNM1,PP…
REACTOME_PI_3K_CASCADE	-0.42809	-0.988009	0.534149	1	56	52	FGF6,MLST8,TRIB3,FGFR4,RPS6KB2,FGF19,AKT1S1,BAD,CDKN1A,AKT2,FGFR3,AKT1,GSK3A,TSC2,THEM4,MAPKAP1,CASP9,FGF18,FGF3,NR4A1,PHLPP1,GRB2,FGF17,CDKN1B,FOXO4,MDM2,MTOR,CHUK,FGF23,PDPK1,FGF20,PIK3R1,PTEN,FOXO3,GAB1,FRS2,CREB1,KL,FGFR2,FGF9,PIK3CA,FOXO1,RICTOR,FGF4,FGFR1,FGF8,AKT3,KLB,FGF2,FGF7,FGF1,FGF10
REACTOME_GPVI_MEDIATED_ACTIVATION_CASCADE	-0.464314	-1.01128	0.506342	1	31	31	PIK3R2,RHOG,PRKCZ,AKT2,AKT1,RAC1,SYK,RHOA,RHOB,CDC42,VAV3,RAC2,PIK3R3,LYN,LCK,LAT,PDPK1,PIK3CB,PIK3R1,VAV1,PIK3CA,FYN,FCER1G,PLCG2,LCP2,COL1A1,AKT3,COL1A2,PIK3R6,PIK3R5,PIK3CG
REACTOME_GPCR_LIGAND_BINDING	-0.488721	-1.18304	0.023	1	408	294	CCL16,F2,GCGR,CALCB,KNG1,CALCA,GALR3,WNT3A,FFAR3,OXT,SAA1,FZD9,KISS1,PTGER1,HTR4,PF4,RGR,GAL,NMU,SSTR5,WNT16,NPW,HCRT,DRD2,CCL25,RXFP4,OXER1,MC3R,CHRM1,LPAR2,GNG13,PTH2R,IHH,GNB2,SCTR,NMB,ADRA1B,WNT4,FZD10,RLN2,CCK,UTS2,ADORA2B,LHB,SCT,CXCL3,CCL20,WNT6,P2RY2,VIPR1,P2RY11,GAST,UTS2R,NPY5R,NPY2R,GPR39,GNG4,GNG5,CXCR3,CXCL2,PYY,CXCL1,LTB4R,KISS1R,WNT11,SHH,AGT,CCR10,CCL28,EDN2,ADM2,MTNR1A,HEBP1,NPSR…
REACTOME_GPCR_DOWNSTREAM_SIGNALING	-0.492454	-1.20223	0.002	1	805	410	CCL16,F2,GCGR,CALCB,OR52E8,KNG1,CALCA,GALR3,PIK3R2,OR51B4,FFAR3,OXT,SAA1,KISS1,PTGER1,HTR4,PF4,RGR,OR7D2,OR2W3,OR1F1,GAL,NMU,RASGRF1,SSTR5,NPW,HCRT,DRD2,CCL25,RXFP4,OXER1,MC3R,CHRM1,LPAR2,GNG13,PTH2R,GNB2,SCTR,NMB,ADRA1B,RLN2,CCK,UTS2,ADORA2B,ARHGEF16,LHB,SCT,CXCL3,CCL20,P2RY2,VIPR1,DGKQ,RHOG,P2RY11,ARHGAP4,GAST,UTS2R,OR52B6,NPY5R,OR2L2,OR2AK2,ADCY8,OR2A4,OR51A7,NPY2R,RHOC,GNG4,GNG5,CXCR3,RGS11,A…
REACTOME_GLYCOSAMINOGLYCAN_METABOLISM	-0.544084	-1.2792	0.0271903	1	111	100	CHST9,CHST13,IDUA,B4GALT7,B3GALT6,HYAL1,B3GAT3,HYAL2,B3GNT4,NAGLU,B4GALT2,B4GALT3,GUSB,HS3ST6,SGSH,B3GNT3,GPC3,SDC1,HS3ST1,CHPF,GLB1,HEXB,HMMR,SLC9A1,AGRN,B4GALT4,GPC4,HAS3,CD44,EXT2,ST3GAL3,GPC2,SDC4,GLCE,CHST7,BCAN,B3GNT7,HS6ST1,HEXA,ST3GAL2,HS6ST2,CHST5,GPC1,CHST14,ABCC5,EXT1,B4GALT1,B4GALT5,HPSE,B4GALT6,B3GNT2,SDC3,HS2ST1,GXYLT1,GNS,FMOD,NDST1,GPC5,CSGALNACT1,HAS2,IDS,ARSB,CHST2,CSPG4,ST3GAL1…
REACTOME_GLYCOGEN_BREAKDOWN_GLYCOGENOLYSIS	-0.45856	-0.92147	0.646993	1	18	16	PYGB,PHKG2,GYG1,GYG2,CALM3,PHKA1,PGM1,PHKA2,CALM2,CALM1,PYGL,PGM2,PHKB,AGL,PHKG1,PYGM
REACTOME_CD28_CO_STIMULATION	-0.36727	-0.814935	0.788807	1	32	31	PIK3R2,MLST8,TRIB3,AKT2,AKT1,SRC,THEM4,RAC1,MAPKAP1,PAK1,MAP3K14,CDC42,GRB2,MTOR,PIK3R3,LYN,PAK2,LCK,MAP3K8,PDPK1,YES1,PIK3R1,VAV1,PIK3CA,RICTOR,FYN,GRAP2,CD86,AKT3,CD80,CD28
REACTOME_GLUCAGON_TYPE_LIGAND_RECEPTORS	-0.457615	-1.00288	0.504228	1	33	30	GCGR,GNG13,GNB2,SCTR,SCT,VIPR1,GNG4,GNG5,GHRH,GNAS,GNB1,GIPR,GNG10,GNG12,GNGT1,GNB5,GNB3,GLP1R,GNG3,GNG11,VIPR2,GNG8,VIP,GNG7,GNGT2,GNG2,GCG,GNB4,ADCYAP1,GLP2R
REACTOME_GLUCAGON_SIGNALING_IN_METABOLIC_REGULATION	-0.382959	-0.843704	0.764331	1	34	33	GCGR,GNG13,GNB2,PRKAR1B,ADCY8,GNG4,GNG5,GNAS,ADCY3,GNB1,ADCY6,PRKACA,PRKAR2A,GNG10,GNG12,ADCY9,ADCY2,PRKACB,ADCY4,ADCY1,GNB3,PRKAR1A,GNG3,ADCY7,GNG11,PRKACG,GNG8,PRKAR2B,GNG7,ADCY5,GNG2,GCG,GNB4
REACTOME_GENERIC_TRANSCRIPTION_PATHWAY	-0.382368	-0.930043	0.779	1	352	319	ZNF479,NR1I3,NPPA,NR2F6,NR0B1,UBA52,ZNF556,NR0B2,MED16,TEAD4,ZNF492,RPS27A,ESRRA,TRIM28,NR2C2AP,ZNF213,ZNF205,MED27,RORC,KAT2A,THRA,ZNF625,ZNF560,MED30,E2F4,PPARG,NR1H2,MED10,ZNF584,ZNF282,ZNF285,ZNF517,MEN1,NR1I2,NR1D1,NR1H3,MED8,MED26,RARG,ZNF446,HDAC1,ZNF607,MED31,RXRA,ZNF627,RXRB,JUNB,MYC,TGIF1,MED15,ZNF394,ZNF416,TFDP1,NR6A1,ZNF311,CDK8,ZNF266,ZNF334,MED7,ZNF324,ZNF3,NCOR2,MED4,ZNF263,ZNF582…
REACTOME_GENERATION_OF_SECOND_MESSENGER_MOLECULES	-0.570044	-1.23879	0.144397	1	27	26	VASP,PAK1,PLCG1,CD3D,ZAP70,NCK1,PAK2,LCK,LAT,ENAH,HLA-DRB1,CD3E,HLA-DRB5,CD247,HLA-DPB1,HLA-DPA1,WAS,HLA-DQA2,CD3G,EVL,CD4,GRAP2,HLA-DQA1,LCP2,FYB,ITK
REACTOME_GASTRIN_CREB_SIGNALLING_PATHWAY_VIA_PKC_AND_MAPK	-0.421395	-1.01022	0.498498	1	205	168	F2,GCGR,KNG1,PIK3R2,FFAR3,OXT,SAA1,KISS1,PTGER1,NMU,HCRT,HRAS,CHRM1,LPAR2,GNG13,GNB2,MAP2K2,NMB,ADRA1B,CCK,UTS2,MAPK3,P2RY2,DGKQ,P2RY11,GAST,UTS2R,RPS6KA1,GNG4,GNG5,LTB4R,KISS1R,PLCB3,AGT,DAGLA,EDN2,CDK1,DAGLB,NPSR1,NMUR2,NPFFR1,PRKCD,GNA11,F2RL1,MAPK7,TAC3,DGKD,GNA15,GNB1,RAF1,XCL1,LPAR3,MGLL,ITPR3,PLCB4,ADRA1D,DGKA,DGKG,YWHAB,KALRN,HBEGF,GRB2,APP,EDN3,GNA14,MAP2K1,HTR2C,NRAS,RPS6KA3,PIK3R3,MAPK…
REACTOME_GAP_JUNCTION_TRAFFICKING	-0.321044	-0.6844	0.904139	1	27	22	GJB1,GJB5,GJC2,CLTB,CLTA,GJB3,DNM2,AP2M1,GJA3,GJB4,DNM1,CLTC,GJA4,GJB2,MYO6,CLTCL1,DAB2,GJB6,GJB7,GJA5,GJA1,GJC1
REACTOME_GABA_RECEPTOR_ACTIVATION	-0.526842	-1.18637	0.176591	1	52	46	GABRA4,KCNJ9,GNB2,KCNJ12,ADCY8,GNG4,GNG5,ADCY3,ARHGEF9,GNB1,ADCY6,GABRR1,KCNJ3,GABRB1,GABBR1,GABRB3,GNG10,KCNJ4,GNAI2,KCNJ2,GNG12,ADCY9,ADCY2,GNGT1,ADCY4,ADCY1,GNB3,GNG3,ADCY7,GABRA2,GNAI1,GABRB2,GNG8,GABRA3,GNAL,GNG7,GNGT2,ADCY5,GNG2,GABRG3,KCNJ10,KCNJ16,GABRG2,KCNJ15,KCNJ5,GABRR2
REACTOME_GABA_B_RECEPTOR_ACTIVATION	-0.497369	-1.09828	0.350636	1	38	35	KCNJ9,GNB2,KCNJ12,ADCY8,GNG4,GNG5,ADCY3,GNB1,ADCY6,KCNJ3,GABBR1,GNG10,KCNJ4,GNAI2,KCNJ2,GNG12,ADCY9,ADCY2,GNGT1,ADCY4,ADCY1,GNB3,GNG3,ADCY7,GNAI1,GNG8,GNAL,GNG7,GNGT2,ADCY5,GNG2,KCNJ10,KCNJ16,KCNJ15,KCNJ5
REACTOME_GAB1_SIGNALOSOME	-0.270253	-0.59297	0.967675	1	38	36	MLST8,TRIB3,RPS6KB2,EGF,AKT1S1,BAD,CDKN1A,AKT2,CSK,AKT1,GSK3A,TSC2,SRC,THEM4,MAPKAP1,CASP9,NR4A1,PHLPP1,GRB2,CDKN1B,FOXO4,MDM2,MTOR,CHUK,PDPK1,PIK3R1,PTEN,FOXO3,GAB1,EGFR,CREB1,PIK3CA,FOXO1,PAG1,RICTOR,AKT3
REACTOME_GRB2_EVENTS_IN_ERBB2_SIGNALING	-0.232606	-0.481199	0.99027	1	22	21	HRAS,MAP2K2,EGF,MAPK3,ERBB2,CDK1,RAF1,BTC,YWHAB,HBEGF,GRB2,MAP2K1,NRG4,NRAS,MAPK1,EREG,KRAS,EGFR,SOS1,NRG2,NRG1
REACTOME_GROWTH_HORMONE_RECEPTOR_SIGNALING	-0.41214	-0.853198	0.722944	1	24	21	SOCS1,MAPK3,CISH,SH2B1,PTPN6,IRS2,STAT5A,SOCS2,PTPN1,MAPK1,STAT5B,LYN,PRLR,STAT3,ADAM17,STAT1,IRS1,GHR,JAK2,SOCS3,PRL
REACTOME_G_ALPHA1213_SIGNALLING_EVENTS	-0.389766	-0.908348	0.70404	1	74	70	PIK3R2,RASGRF1,GNG13,GNB2,ADRA1B,ARHGEF16,RHOG,ARHGAP4,RHOC,GNG4,GNG5,NGEF,PLXNB1,OBSCN,RAC1,ARHGEF9,GNB1,RHOA,RHOB,ABR,FGD3,ADRA1D,FGD1,CDC42,KALRN,ARHGEF4,VAV3,RAC2,ARHGEF11,ARHGEF2,NET1,ECT2,PIK3R3,GNG10,ARHGEF3,GNA12,ROCK1P1,ARHGEF18,GNG12,GNGT1,PIK3R1,ROCK2,SOS2,GNB5,GNA13,GNB3,GNG3,TBXA2R,ITSN1,FGD4,ARHGEF12,TRIO,SOS1,VAV1,PREX1,PLEKHG2,PIK3CA,GNG11,ROCK1,ARHGEF17,RASGRF2,GNG8,TIAM2,GNG7,GN…
REACTOME_G_ALPHA_I_SIGNALLING_EVENTS	-0.504916	-1.20641	0.043	1	195	152	CCL16,KNG1,GALR3,SAA1,PF4,RGR,GAL,NMU,SSTR5,NPW,DRD2,CCL25,RXFP4,OXER1,LPAR2,GNG13,GNB2,CXCL3,CCL20,NPY5R,ADCY8,NPY2R,GNG4,GNG5,CXCR3,RGS11,CXCL2,PYY,CXCL1,AGT,CCR10,CCL28,MTNR1A,HEBP1,NMUR2,GNAS,ADCY3,C5,SSTR1,GPR55,GALR2,GNB1,ADCY6,INSL5,HTR1D,LPAR3,S1PR4,OPN3,CXCL16,RGS12,OPRD1,APP,GABBR1,RGS19,GNG10,POMC,GNAZ,S1PR5,GNAI2,ADRA2A,GNG12,ADCY9,ADCY2,PPY,ANXA1,BDKRB2,S1PR2,BDKRB1,GNGT1,GNB5,ADCY4,…
REACTOME_BMAL1_CLOCK_NPAS2_ACTIVATES_CIRCADIAN_EXPRESSION	-0.416006	-0.908682	0.674322	1	36	31	F7,DBP,NPAS2,HDAC3,NR1D1,RXRA,TGS1,PER2,TBL1X,PPARA,CRY2,ARNTL2,NCOA6,SMARCD3,PPARGC1A,CRY1,TBL1XR1,CREBBP,ARNTL,NAMPT,NCOR1,BHLHE40,CLOCK,NCOA1,MED1,NCOA2,NCOA3,BHLHE41,SERPINE1,NR3C1,RORA
REACTOME_PI_METABOLISM	-0.389712	-0.870848	0.735113	1	48	45	PIK3R2,INPP5J,INPP5E,MTMR14,VAC14,PI4KB,INPP5K,INPPL1,PIP5K1B,ARF3,PI4K2B,MTMR1,OCRL,PIK3C2B,PITPNB,MTMR4,FIG4,PIP5K1C,PI4K2A,PIP4K2B,SACM1L,PI4KA,PIK3R3,MTMR2,SYNJ2,MTMR6,PIK3R4,PIK3CB,MTM1,MTMR3,PIK3R1,PTEN,PIK3C3,INPP4B,SYNJ1,PIK3C2A,PIP4K2A,PIK3CA,PIKFYVE,PIK3CD,PIK3R6,PIK3C2G,PIK3R5,PIK3CG,MTMR7
REACTOME_INCRETIN_SYNTHESIS_SECRETION_AND_INACTIVATION	-0.254278	-0.514903	0.980856	1	22	16	PCSK1,GNG13,CDX2,SPCS1,SEC11A,SEC11C,SPCS2,CTNNB1,DPP4,PAX6,ISL1,SPCS3,GATA4,GNB3,GRP,GCG
REACTOME_IL_RECEPTOR_SHC_SIGNALING	-0.412878	-0.878832	0.705376	1	27	24	PIK3R2,HRAS,PTPN6,CSF2,INPPL1,IL2RG,GRB2,SHC1,PIK3R3,GAB2,PIK3CB,PIK3R1,IL3RA,JAK1,SOS1,JAK3,CSF2RA,PIK3CA,JAK2,IL2RB,PIK3CD,IL2RA,CSF2RB,IL5
REACTOME_IL_3_5_AND_GM_CSF_SIGNALING	-0.383334	-0.857033	0.76324	1	43	40	PIK3R2,HRAS,PTPN6,CSF2,SYK,INPPL1,IL2RG,BLNK,TEC,STAT5A,CRKL,GRB2,YWHAZ,CRK,SHC1,PIK3R3,STAT5B,LYN,GAB2,RAPGEF1,PIK3CB,PRKACB,YES1,PIK3R1,IL3RA,JAK1,SOS1,CBL,JAK3,VAV1,CSF2RA,PIK3CA,JAK2,FYN,IL2RB,HCK,PIK3CD,IL2RA,CSF2RB,IL5
REACTOME_IL_2_SIGNALING	-0.327874	-0.733531	0.878788	1	41	38	PIK3R2,HRAS,MAP2K2,MAPK3,CDK1,PTPN6,CSF2,SYK,INPPL1,RAF1,IL2RG,YWHAB,PTK2B,STAT5A,GRB2,MAP2K1,NRAS,SHC1,PIK3R3,MAPK1,STAT5B,LCK,GAB2,PIK3CB,KRAS,PIK3R1,IL3RA,JAK1,SOS1,JAK3,CSF2RA,PIK3CA,JAK2,IL2RB,PIK3CD,IL2RA,CSF2RB,IL5
REACTOME_IL1_SIGNALING	-0.41827	-0.929516	0.656639	1	39	36	RBX1,TNIP2,TOLLIP,TAB1,UBE2N,SQSTM1,PELI3,SKP1,CUL1,MYD88,RIPK2,MAP2K6,IL1R2,IKBKB,IRAK4,IKBKG,BTRC,MAP2K1,MAP2K4,CHUK,MAP3K7,TAB3,PELI1,MAP3K8,NOD1,TAB2,TRAF6,IL1A,IRAK2,NOD2,MAP3K3,PELI2,IL1RAP,IL1RN,IL1B,IL1R1
REACTOME_FRS2_MEDIATED_CASCADE	-0.458023	-1.00212	0.513034	1	36	34	FGF6,FGFR4,HRAS,MAP2K2,FGF19,MAPK3,FGFR3,FRS3,CDK1,RAF1,FGF18,FGF3,YWHAB,GRB2,FGF17,MAP2K1,NRAS,MAPK1,FGF23,FGF20,KRAS,FRS2,KL,SOS1,FGFR2,FGF9,FGF4,FGFR1,FGF8,KLB,FGF2,FGF7,FGF1,FGF10
REACTOME_HS_GAG_DEGRADATION	-0.359469	-0.735386	0.855568	1	20	19	IDUA,NAGLU,GUSB,SGSH,GPC3,SDC1,GLB1,AGRN,GPC4,GPC2,SDC4,GPC1,HPSE,SDC3,GPC5,IDS,HSPG2,SDC2,GPC6
REACTOME_BRANCHED_CHAIN_AMINO_ACID_CATABOLISM	-0.41772	-0.841718	0.737079	1	17	17	HSD17B10,BCAT2,ACAT1,HIBADH,IVD,AUH,MCCC2,MCCC1,ACAD8,DLD,HIBCH,BCKDHB,ACADSB,ALDH6A1,BCKDHA,DBT,BCAT1
REACTOME_HOMOLOGOUS_RECOMBINATION_REPAIR_OF_REPLICATION_INDEPENDENT_DOUBLE_STRAND_BREAKS	-0.298856	-0.593752	0.946309	1	17	15	H2AFX,RPA3,RAD51,LIG1,RPA2,RAD52,RPA1,BRCA1,RAD50,MDC1,NBN,TP53BP1,BRIP1,BRCA2,ATM
REACTOME_HEMOSTASIS	-0.358028	-0.867924	0.943	1	466	409	SERPINC1,HRG,ALB,FGG,FGA,FGB,F13B,APOA1,TF,APOB,F2,KNG1,PIK3R2,KLKB1,F11,F7,HBE1,LEFTY2,PF4,F12,ITGA2B,ATP2B2,SERPINF2,CFD,GP9,HBD,SERPINA1,HRAS,SH2B2,TUBA4A,GNG13,ZFPM1,GNB2,SLC7A9,C1QBP,KCNMB4,EGF,ALDOA,F10,PRKAR1B,ATP2A1,PROC,PFN1,PPIA,PPP2R1A,SLC7A5,CDK5,MAPK3,SOD1,KIF9,HMG20B,BSG,DGKQ,TMSB4X,ITPK1,RHOG,SLC3A2,KIF22,KIFC1,CD9,TP53,HBG2,GNG4,GNG5,PRKCZ,AKT2,CFL1,CSK,GRB7,NOS2,KLC4,IRF3,ATP1B3,…
REACTOME_G_PROTEIN_ACTIVATION	-0.506303	-1.0774	0.381877	1	27	22	GNG13,GNB2,GNG4,GNG5,GNB1,GNG10,POMC,GNAZ,GNAI2,GNG12,GNGT1,GNB5,GNB3,GNG3,GNAI1,GNG11,GNG8,GNG7,GNGT2,GNG2,GNB4,GNAO1
REACTOME_G_BETA_GAMMA_SIGNALLING_THROUGH_PLC_BETA	-0.511266	-1.06679	0.41087	1	20	20	GNG13,GNB2,GNG4,GNG5,PLCB3,GNB1,GNG10,GNG12,GNGT1,GNB5,GNB3,PLCB1,GNG3,PLCB2,GNG11,GNG8,GNG7,GNGT2,GNG2,GNB4
REACTOME_G_ALPHA_S_SIGNALLING_EVENTS	-0.478017	-1.12947	0.223223	1	121	92	GCGR,CALCB,CALCA,HTR4,MC3R,GNG13,PTH2R,GNB2,SCTR,RLN2,ADORA2B,LHB,SCT,VIPR1,P2RY11,ADCY8,GNG4,GNG5,ADM2,NPSR1,GHRH,GNAS,MC1R,ADCY3,GNB1,ADCY6,PTGER4,GIPR,RAMP1,ADRB1,PTGER2,RAMP2,PDE8A,GNG10,POMC,GNAZ,GNAI2,INSL3,ADM,PDE7A,GNG12,RAMP3,ADCY9,ADCY2,GNGT1,PTGDR,PDE3B,GNB5,ADCY4,ADCY1,GNB3,GLP1R,GPBAR1,GNG3,ADCY7,GNAI1,AVPR2,GNG11,PDE4D,DRD1,PDE3A,VIPR2,PDE4B,GNG8,PDE8B,VIP,PDE11A,GNG7,DRD5,GNGT2,ADC…
REACTOME_G_ALPHA_Q_SIGNALLING_EVENTS	-0.436022	-1.04041	0.388388	1	184	147	F2,GCGR,KNG1,PIK3R2,FFAR3,OXT,SAA1,KISS1,PTGER1,NMU,HCRT,CHRM1,LPAR2,GNG13,GNB2,NMB,ADRA1B,CCK,UTS2,P2RY2,DGKQ,P2RY11,GAST,UTS2R,GNG4,GNG5,LTB4R,KISS1R,PLCB3,AGT,DAGLA,EDN2,DAGLB,NPSR1,NMUR2,NPFFR1,PRKCD,GNA11,F2RL1,TAC3,DGKD,GNA15,GNB1,XCL1,LPAR3,MGLL,ITPR3,PLCB4,ADRA1D,DGKA,DGKG,KALRN,APP,EDN3,GNA14,HTR2C,PIK3R3,DGKE,RGS19,GNG10,CHRM3,PRKCE,HRH1,XCL2,PRKCQ,GNG12,LPAR6,GRPR,ANXA1,QRFP,P2RY6,BDKR…
REACTOME_HS_GAG_BIOSYNTHESIS	-0.555665	-1.21224	0.18836	1	31	29	HS3ST6,GPC3,SDC1,HS3ST1,AGRN,GPC4,EXT2,GPC2,SDC4,GLCE,HS6ST1,HS6ST2,GPC1,EXT1,SDC3,HS2ST1,NDST1,GPC5,NDST4,HSPG2,SDC2,HS3ST5,HS3ST3A1,NDST2,HS3ST2,HS3ST4,HS3ST3B1,GPC6,NDST3
REACTOME_FORMATION_OF_TUBULIN_FOLDING_INTERMEDIATES_BY_CCT_TRIC	-0.392838	-0.811914	0.795604	1	22	21	TUBA3C,TUBB4B,TUBA4A,CCT7,TUBA1C,CCT3,CCT2,CCT4,CCT5,TUBA1B,CCT8,CCT6A,TCP1,TUBB2A,TUBB3,TUBA1A,TUBB6,TUBB2B,TUBA3D,TUBB4A,TUBB1
REACTOME_CD28_DEPENDENT_PI3K_AKT_SIGNALING	-0.401053	-0.839438	0.747817	1	22	21	PIK3R2,MLST8,TRIB3,AKT2,AKT1,THEM4,MAPKAP1,MAP3K14,MTOR,PIK3R3,LCK,MAP3K8,PDPK1,PIK3R1,PIK3CA,RICTOR,FYN,CD86,AKT3,CD80,CD28
REACTOME_CELL_CELL_COMMUNICATION	-0.410606	-0.971156	0.596386	1	120	98	PIK3R2,CDH15,CLDN3,CLDN14,CRB3,PARD6A,CLDN2,CLDN10,CLDN4,CLDN7,CD151,CLDN9,CDH24,CDH3,CLDN15,JUP,ITGB4,MAPK13,TESK1,NCK2,DSCAML1,PARVB,VASP,SRC,PTPN6,RAC1,ACTN4,PVR,F11R,PLEC,PAK1,CTNNA1,CTNNB1,CLDN12,FBLIM1,CDH1,PARD3,MAPK14,PTK2B,PARD6B,GRB2,CD47,RSU1,PTK2,CLDN1,CLDN16,CLDN5,MAPK12,NCK1,MAPK8,SPTAN1,CTNND1,ACTN1,PRKCI,PARVA,WASL,MPP5,PIK3CB,SKAP2,SPTBN1,LAMC2,LAMA3,IQGAP1,PIK3R1,TYROBP,ILK,KIRR…
REACTOME_DAG_AND_IP3_SIGNALING	-0.53262	-1.14398	0.28	1	32	30	PRKAR1B,ADCY8,CALM3,PRKCD,CALM2,ADCY3,CALM1,ADCY6,PRKACA,ITPR3,PLCG1,PRKCG,PRKAR2A,PRKCE,ADCY9,ADCY2,PRKACB,PRKCA,ADCY4,ADCY1,PRKAR1A,ADCY7,CREB1,PRKACG,ITPR2,PRKAR2B,ADCY5,PDE1A,PDE1B,CAMK4
REACTOME_CYTOKINE_SIGNALING_IN_IMMUNE_SYSTEM	-0.378224	-0.915528	0.78	1	270	236	PIK3R2,SOCS1,UBA52,HRAS,IFI27,MAP2K2,IFITM2,PIN1,RPS27A,IFITM3,PSMB8,IFITM1,MAPK3,HLA-G,RBX1,CASP1,TNIP2,AAAS,ISG15,CISH,GBP7,NUP85,NUP37,EIF4A3,TOLLIP,IP6K2,IRF3,EIF4E2,HLA-A,IL18,HLA-F,CDK1,IFI35,TYK2,TAB1,SH2B1,RAE1,UBE2N,IRF7,KPNA2,PTPN6,OASL,SQSTM1,PRKCD,NUP93,IFNGR2,OAS1,CSF2,NUP43,NUP88,NUP188,SEH1L,HLA-C,PELI3,NUP62,NUP35,SKP1,MT2A,SYK,INPPL1,CUL1,IRF6,RELA,HLA-B,MYD88,PML,UBE2E1,RAF1,UBE…
REACTOME_CELL_JUNCTION_ORGANIZATION	-0.432907	-0.996999	0.526904	1	78	60	CDH15,CLDN3,CLDN14,CRB3,PARD6A,CLDN2,CLDN10,CLDN4,CLDN7,CD151,CLDN9,CDH24,CDH3,CLDN15,JUP,ITGB4,TESK1,PARVB,VASP,PVR,F11R,PLEC,CTNNA1,CTNNB1,CLDN12,FBLIM1,CDH1,PARD3,PARD6B,RSU1,CLDN1,CLDN16,CLDN5,CTNND1,ACTN1,PRKCI,PARVA,MPP5,LAMC2,LAMA3,ILK,CLDN8,PARD6G,LIMS1,ITGB1,CADM2,CDH9,CDH13,FLNC,CDH5,ARHGEF6,FERMT2,CDH4,CDH11,CADM1,CLDN18,CDH2,CLDN20,CDH6,CLDN6
REACTOME_CELL_SURFACE_INTERACTIONS_AT_THE_VASCULAR_WALL	-0.457799	-1.07068	0.347782	1	91	80	APOB,F2,PIK3R2,PF4,HRAS,SLC7A9,PROC,PPIA,SLC7A5,BSG,SLC3A2,GRB7,ATP1B3,ATP1B1,CD58,SRC,PTPN6,GRB14,ITGA3,PPIL2,SLC7A8,F11R,SLC16A1,PLCG1,GRB2,CD47,PF4V1,CXADR,NRAS,SLC7A6,SHC1,LYN,LCK,SLC16A8,PIK3CB,KRAS,YES1,PIK3R1,SLC7A11,SLC7A7,L1CAM,ESAM,PROS1,SOS1,MERTK,CD48,CD2,SIRPG,PIK3CA,DOK2,ITGB1,CAV1,FYN,ANGPT2,SIRPA,FCER1G,THBD,MMP1,JAM3,ITGAV,PECAM1,ITGB2,ITGAL,ITGA5,SPN,TEK,ITGAX,COL1A1,SELL,SELP,F…
REACTOME_CTLA4_INHIBITORY_SIGNALING	-0.469464	-0.98529	0.533044	1	21	21	PPP2R1A,AKT2,AKT1,SRC,PPP2R5D,PPP2CA,PPP2R5A,PPP2CB,PPP2R5B,PPP2R5C,PPP2R1B,LYN,LCK,PDPK1,PPP2R5E,YES1,FYN,CTLA4,CD86,AKT3,CD80
REACTOME_CROSS_PRESENTATION_OF_SOLUBLE_EXOGENOUS_ANTIGENS_ENDOSOMES	-0.278048	-0.624153	0.96484	1	48	45	PSMB3,PSMD3,PSMA7,PSMB10,PSMD8,PSMB4,PSMB5,PSMB8,PSMB1,PSMB7,PSMB6,PSMC3,PSMD4,PSMD13,PSMB9,PSMA5,PSMC4,PSMB2,PSME1,PSMC5,PSMF1,PSMD9,PSMD14,PSMA3,PSMD10,PSMA1,PSMA4,PSMC2,PSMA2,PSMD2,PSMD6,PSMA6,PSMC6,PSMD11,PSMD12,PSMD7,PSMD5,PSMD1,PSMC1,PSME4,FCGR1B,CD207,MRC2,FCGR1A,MRC1
REACTOME_CREB_PHOSPHORYLATION_THROUGH_THE_ACTIVATION_OF_RAS	-0.37969	-0.817218	0.787097	1	27	26	GRIN2C,RASGRF1,HRAS,GRIN2D,RRAS,RPS6KA1,GRIN1,CALM3,CALM2,NEFL,CALM1,RAF1,RPS6KA6,RPS6KA3,MAPK1,CAMK2D,PDPK1,RPS6KA2,BRAF,CREB1,AKAP9,ACTN2,RASGRF2,GRIN2B,CAMK2B,CAMK2A
REACTOME_DARPP_32_EVENTS	-0.231026	-0.489659	0.983906	1	25	23	PPP1R1B,PRKAR1B,PPP1CA,PPP2R1A,CDK5,CALM3,PPP2R5D,CALM2,PPP2CA,CALM1,PRKACA,PPP2CB,PPP3R1,PPP2R1B,PRKAR2A,PPP3CB,PPP3CA,PRKACB,PRKAR1A,PRKACG,PDE4D,PDE4B,PRKAR2B
REACTOME_COSTIMULATION_BY_THE_CD28_FAMILY	-0.488485	-1.1229	0.261445	1	63	61	PIK3R2,MLST8,TRIB3,PPP2R1A,TNFRSF14,AKT2,CSK,AKT1,SRC,PTPN6,THEM4,PPP2R5D,RAC1,PPP2CA,MAPKAP1,PPP2R5A,PAK1,PPP2CB,MAP3K14,PPP2R5B,PPP2R5C,CDC42,PPP2R1B,GRB2,CD3D,MTOR,PIK3R3,LYN,PAK2,LCK,MAP3K8,PDPK1,PPP2R5E,YES1,PIK3R1,HLA-DRB1,CD3E,HLA-DRB5,VAV1,CD247,PDCD1,HLA-DPB1,PIK3CA,RICTOR,FYN,HLA-DPA1,HLA-DQA2,CD3G,CD4,GRAP2,CD274,CTLA4,HLA-DQA1,ICOSLG,CD86,ICOS,AKT3,PDCD1LG2,CD80,CD28,BTLA
REACTOME_CLASS_I_MHC_MEDIATED_ANTIGEN_PROCESSING_PRESENTATION	-0.201121	-0.483975	1	1	251	221	ASB12,ANAPC11,PSMB3,SOCS1,UBA52,CYBA,UBE2S,CDC34,CDC20,RBCK1,PSMD3,FBXO2,STUB1,PSMA7,ASB9,PSMB10,RPS27A,PSMD8,PSMB4,UBE2M,PSMB5,PSMB8,PSMB1,KEAP1,FBXO6,UBE2C,FBXO44,PSMB7,SEC13,HLA-G,RBX1,UBE2J2,PSMB6,PSMC3,SEC61B,PSMD4,ASB13,PSMD13,PSMB9,PSMA5,ANAPC2,PSMC4,RNF25,PSMB2,PSME1,ANAPC7,PSMC5,LRSAM1,KLHL13,PSMF1,HECTD3,ANAPC5,ASB6,RNF220,UBE2D4,SEC61G,ASB4,HLA-A,UBE2D2,UBA1,PSMD9,HLA-F,LRR1,PSMD14,RNF…
REACTOME_CLASS_B_2_SECRETIN_FAMILY_RECEPTORS	-0.397341	-0.925466	0.679112	1	88	73	GCGR,CALCB,CALCA,WNT3A,FZD9,WNT16,GNG13,PTH2R,IHH,GNB2,SCTR,WNT4,FZD10,SCT,WNT6,VIPR1,GNG4,GNG5,WNT11,SHH,ADM2,GHRH,GNAS,GNB1,FZD5,GIPR,FZD2,RAMP1,WNT10A,CD55,FZD6,FZD7,RAMP2,FZD3,GNG10,ADM,GNG12,RAMP3,PTCH1,SMO,GNGT1,GNB5,GNB3,GLP1R,GNG3,WNT10B,WNT7B,FZD1,GNG11,VIPR2,WNT2,WNT9A,GNG8,WNT5A,FZD4,VIP,WNT8B,GNG7,PTCH2,GNGT2,GNG2,GCG,PTH,CALCRL,WNT2B,GNB4,WNT7A,PTH1R,PTHLH,WNT1,DHH,ADCYAP1,GLP2R
REACTOME_CLASS_A1_RHODOPSIN_LIKE_RECEPTORS	-0.515842	-1.24159	0.008	1	305	215	CCL16,F2,KNG1,GALR3,FFAR3,OXT,SAA1,KISS1,PTGER1,HTR4,PF4,RGR,GAL,NMU,SSTR5,NPW,HCRT,DRD2,CCL25,RXFP4,OXER1,MC3R,CHRM1,LPAR2,NMB,ADRA1B,RLN2,CCK,UTS2,ADORA2B,LHB,CXCL3,CCL20,P2RY2,P2RY11,GAST,UTS2R,NPY5R,NPY2R,GPR39,CXCR3,CXCL2,PYY,CXCL1,LTB4R,KISS1R,AGT,CCR10,CCL28,EDN2,MTNR1A,HEBP1,NPSR1,NMUR2,NPFFR1,MC1R,F2RL1,C5,TAC3,SSTR1,GPR55,GALR2,XCL1,INSL5,HTR1D,LPAR3,S1PR4,PTGER4,ADRA1D,OPN3,CXCL16,ADRB…
REACTOME_CHEMOKINE_RECEPTORS_BIND_CHEMOKINES	-0.588702	-1.3097	0.0426195	1	57	47	CCL16,PF4,CCL25,CXCL3,CCL20,CXCR3,CXCL2,CXCL1,CCR10,CCL28,XCL1,CXCL16,XCL2,CX3CL1,CCL5,CXCR6,CCL3L3,CXCL11,XCR1,CXCL10,CCL3,CXCR4,CCL4,CCL11,CXCR2,CCL22,CCL17,CXCR1,CCL2,CCR9,CXCL5,CXCL6,CXCL13,CCR7,CXCL9,CCR1,PPBP,CCR5,CXCL12,CCL21,CCL7,CCR3,CCL19,CCR4,CCR2,CCR8,CX3CR1
REACTOME_CIRCADIAN_REPRESSION_OF_EXPRESSION_BY_REV_ERBA	-0.482137	-1.00898	0.50272	1	23	21	NPAS2,HDAC3,NR1D1,RXRA,TGS1,TBL1X,PPARA,NCOA6,SMARCD3,PPARGC1A,TBL1XR1,CREBBP,ARNTL,NCOR1,CLOCK,NCOA1,MED1,NCOA2,NCOA3,ELOVL3,RORA
REACTOME_CIRCADIAN_CLOCK	-0.397222	-0.889919	0.711066	1	53	46	F7,UBA52,RPS27A,SREBF1,DBP,NPAS2,HDAC3,NR1D1,RXRA,CSNK1D,CPT1A,SKP1,CUL1,TGS1,PER2,TBL1X,PPARA,BTRC,CRY2,ARNTL2,NCOA6,FBXL3,SMARCD3,PPARGC1A,CRY1,MEF2D,TBL1XR1,CREBBP,ARNTL,ATF2,NAMPT,NCOR1,BHLHE40,CLOCK,NCOA1,CREB1,MED1,NCOA2,NCOA3,BHLHE41,HIF1A,ELOVL3,SERPINE1,MEF2C,NR3C1,RORA
REACTOME_CHONDROITIN_SULFATE_DERMATAN_SULFATE_METABOLISM	-0.542897	-1.22132	0.145361	1	49	43	CHST9,CHST13,IDUA,B4GALT7,B3GALT6,HYAL1,B3GAT3,GPC3,SDC1,CHPF,HEXB,AGRN,GPC4,GPC2,SDC4,CHST7,BCAN,HEXA,GPC1,CHST14,SDC3,GXYLT1,GPC5,CSGALNACT1,IDS,ARSB,CSPG4,CHSY1,GXYLT2,CHST3,HSPG2,SDC2,CSGALNACT2,BGN,CHST15,CHST11,UST,DCN,DSE,GPC6,VCAN,CHSY3,B3GAT2
REACTOME_CLEAVAGE_OF_GROWING_TRANSCRIPT_IN_THE_TERMINATION_REGION_	-0.227158	-0.507666	0.99691	1	44	40	SNRPF,SNRPB,LSM10,SNRPG,SRSF9,MAGOH,SNRPE,SRSF7,U2AF2,SLBP,RNPS1,SNRPD3,PABPN1,CSTF1,CPSF3,CLP1,SRSF3,CSTF2,SRSF6,NCBP2,SRSF4,ZNF473,DHX38,RBM8A,CSTF3,NCBP1,SRSF5,UPF3B,CPSF7,SRSF1,NFX1,NUDT21,CPSF2,SRRM1,LSM11,PAPOLA,SRSF11,CDC40,PCF11,U2AF1
REACTOME_INHIBITION_OF_INSULIN_SECRETION_BY_ADRENALINE_NORADRENALINE	-0.51101	-1.08272	0.380388	1	25	25	GNG13,GNB2,GNG4,GNG5,CACNB3,GNB1,ADCY6,GNG10,GNAI2,ADRA2A,GNG12,GNGT1,GNB5,GNB3,GNG3,GNAI1,CACNB2,GNG11,GNG8,GNG7,GNGT2,ADCY5,GNG2,GNB4,GNAO1
REACTOME_DEGRADATION_OF_THE_EXTRACELLULAR_MATRIX	-0.500967	-1.07927	0.369264	1	29	27	KLKB1,MMP8,PRSS2,CTRB1,PRSS1,MMP15,ELANE,FURIN,MMP7,TIMP1,MMP17,MMP24,TPSAB1,KLK2,MMP10,MMP25,MMP11,MMP3,MMP14,CTRB2,MMP1,MMP9,TIMP2,MMP2,CTSG,MMP13,CMA1
REACTOME_DEVELOPMENTAL_BIOLOGY	-0.46497	-1.12954	0.068	1	396	346	SLC2A2,LEFTY2,CDH15,ITGA2B,COL2A1,CACNA1S,SLIT1,SH3GL2,PKLR,HRAS,ARTN,MED16,AP2S1,MAP2K2,FOXA3,PDX1,LEFTY1,CLTA,NRTN,PFN1,PAK4,CEBPB,MED27,CEBPD,CDK5,CDK4,MAPK3,TDGF1,COL9A2,MYL6,MED18,RHOG,FOXA2,RRAS,RGMB,ERBB2,RPS6KA4,RPS6KA1,CSNK2B,SREBF1,MED19,DRAP1,HNF1B,ONECUT1,MED11,RHOC,TCF3,AKT2,MED30,CFL1,PPARG,MYL12B,HNF1A,HES1,MED10,DNM2,HDAC3,PLXNB1,NEUROG3,AP2A1,MED8,MED26,PSPN,AP2A2,CDK1,AKT1,NCK2,…
REACTOME_FATTY_ACYL_COA_BIOSYNTHESIS	-0.500051	-1.01661	0.491051	1	18	16	SLC25A1,FASN,HSD17B12,ACSL5,ELOVL6,ACSL6,ACACA,ACLY,ELOVL7,ACSL3,ELOVL5,ACSL1,ACSL4,ELOVL3,ELOVL2,ELOVL4
REACTOME_CELL_CELL_JUNCTION_ORGANIZATION	-0.460694	-1.04491	0.449426	1	56	42	CDH15,CLDN3,CLDN14,CRB3,PARD6A,CLDN2,CLDN10,CLDN4,CLDN7,CLDN9,CDH24,CDH3,CLDN15,JUP,PVR,F11R,CTNNA1,CTNNB1,CLDN12,CDH1,PARD3,PARD6B,CLDN1,CLDN16,CLDN5,CTNND1,PRKCI,MPP5,CLDN8,PARD6G,CADM2,CDH9,CDH13,CDH5,CDH4,CDH11,CADM1,CLDN18,CDH2,CLDN20,CDH6,CLDN6
REACTOME_FANCONI_ANEMIA_PATHWAY	-0.28194	-0.582638	0.946507	1	25	19	UBA52,RPS27A,UBE2T,FANCG,FANCE,FANCA,FANCD2,FANCC,FANCL,FANCF,BRCA1,PALB2,USP1,ATR,FANCB,BRCA2,FANCM,ATM,ZBTB32
REACTOME_CELL_CYCLE	-0.403226	-0.980557	0.598	1	421	375	ANAPC11,CENPM,PSMB3,UBA52,RUVBL2,CDT1,H2AFX,SSNA1,PKMYT1,PPP2R3B,TUBB4B,SPC24,DCTN3,TUBA4A,CDC20,POLD2,B9D2,PSMD3,AURKB,PMF1,BIRC5,E2F1,CDKN2A,PSMA7,PSMB10,MYBL2,POLD1,RPS27A,CCNE1,PSMD8,PSMB4,PTTG1,PSMB5,PSMB8,PSMB1,TUBG1,NHP2,UBE2C,CDC45,PPP2R1A,CCNB1,PSMB7,MCM5,PLK1,GINS2,SEC13,CKS1B,CDK4,RFC2,TERT,H2AFZ,PSMB6,PSMC3,PSMD4,HSPA2,CCNB2,CDC25C,CDKN2D,MCM7,PSMD13,OIP5,PCNA,PSMB9,PSMA5,ANAPC2,PSMC4…
REACTOME_ERK_MAPK_TARGETS	-0.317688	-0.667446	0.911957	1	21	21	PPP2R1A,MAPK3,RPS6KA1,PPP2R5D,ELK1,PPP2CA,MAPK7,DUSP6,DUSP7,PPP2CB,DUSP4,MAPK14,PPP2R1B,DUSP3,RPS6KA3,MAPK1,RPS6KA2,MAPK11,MEF2A,RPS6KA5,MEF2C
REACTOME_ENOS_ACTIVATION_AND_REGULATION	-0.233029	-0.476539	0.98337	1	20	19	NOSIP,SPR,PTS,DNM2,GCHFR,AKT1,CALM3,LYPLA1,NOSTRIN,CALM2,CALM1,DHFR,GCH1,HSP90AA1,NOS3,WASL,ZDHHC21,CAV1,PRKG2
REACTOME_ENERGY_DEPENDENT_REGULATION_OF_MTOR_BY_LKB1_AMPK	-0.329323	-0.666012	0.899775	1	18	16	STK11,PRKAB1,PRKAG1,TSC2,CAB39L,STRADB,RHEB,RPTOR,PRKAG2,TSC1,PPM1A,STRADA,CAB39,PRKAA1,PRKAB2,PRKAA2
REACTOME_CELL_DEATH_SIGNALLING_VIA_NRAGE_NRIF_AND_NADE	-0.393781	-0.898867	0.710204	1	60	55	RASGRF1,UBA52,RPS27A,ARHGEF16,BAD,ARHGAP4,PSENEN,PSEN2,NGEF,APH1A,ITGB3BP,YWHAE,AATF,SQSTM1,OBSCN,RAC1,NCSTN,ARHGEF9,MAGED1,ABR,FGD3,CASP2,CASP3,FGD1,KALRN,ARHGEF4,VAV3,ARHGEF11,PSEN1,ARHGEF2,NET1,ECT2,MAPK8,ARHGEF3,APH1B,ARHGEF18,TRAF6,SOS2,BCL2L11,ITSN1,FGD4,ARHGEF12,TRIO,SOS1,VAV1,PREX1,PLEKHG2,ARHGEF17,RASGRF2,TIAM2,ARHGEF6,NGF,FGD2,NGFR,TIAM1
REACTOME_EFFECTS_OF_PIP2_HYDROLYSIS	-0.63679	-1.31656	0.0809313	1	25	19	DGKQ,DAGLA,DAGLB,PRKCD,DGKD,MGLL,ITPR3,DGKA,DGKG,DGKE,PRKCE,PRKCQ,ITPR2,PRKCH,DGKH,RASGRP2,DGKB,RASGRP1,TRPC6
REACTOME_DOWNSTREAM_SIGNAL_TRANSDUCTION	-0.342042	-0.797042	0.885974	1	95	90	PIK3R2,MLST8,TRIB3,HRAS,MAP2K2,RPS6KB2,PRKAR1B,MAPK3,AKT1S1,BAD,ADCY8,CDKN1A,AKT2,GRB7,BCAR1,CDK1,STAT6,AKT1,NCK2,GSK3A,TSC2,CALM3,SRC,THEM4,PRKCD,CALM2,ADCY3,MAPKAP1,CASP9,CALM1,RAF1,ADCY6,PRKACA,ITPR3,NR4A1,YWHAB,PHLPP1,PLCG1,STAT5A,CRKL,GRB2,CDKN1B,PRKCG,PRKAR2A,MAP2K1,CRK,FOXO4,NRAS,MDM2,MTOR,NCK1,MAPK1,STAT5B,CHUK,STAT3,PDGFA,PRKCE,ADCY9,ADCY2,RAPGEF1,PDPK1,PIK3CB,RASA1,PRKACB,KRAS,PRKCA,PIK…
REACTOME_DOWNSTREAM_SIGNALING_OF_ACTIVATED_FGFR	-0.425669	-1.00845	0.497992	1	100	94	FGF6,MLST8,TRIB3,FGFR4,HRAS,MAP2K2,RPS6KB2,FGF19,PRKAR1B,MAPK3,AKT1S1,BAD,ADCY8,CDKN1A,AKT2,FGFR3,FRS3,CDK1,AKT1,GSK3A,TSC2,CALM3,THEM4,PRKCD,CALM2,ADCY3,MAPKAP1,CASP9,CALM1,RAF1,ADCY6,PRKACA,ITPR3,FGF18,FGF3,NR4A1,YWHAB,PHLPP1,PLCG1,GRB2,FGF17,CDKN1B,PRKCG,PRKAR2A,MAP2K1,FOXO4,NRAS,SHC1,MDM2,MTOR,MAPK1,CHUK,PRKCE,ADCY9,ADCY2,FGF23,PDPK1,FGF20,PRKACB,KRAS,PRKCA,PIK3R1,PTEN,FOXO3,GAB1,FRS2,ADCY4,A…
REACTOME_DOWNSTREAM_SIGNALING_EVENTS_OF_B_CELL_RECEPTOR_BCR	-0.172772	-0.403873	1	1	97	90	PSMB3,UBA52,MLST8,TRIB3,HRAS,RPS6KB2,PSMD3,PSMA7,PSMB10,RPS27A,PSMD8,PSMB4,PSMB5,PSMB8,PSMB1,NFKBIB,PSMB7,AKT1S1,PSMB6,PSMC3,PSMD4,BAD,PSMD13,PSMB9,PSMA5,PSMC4,PSMB2,PSME1,CDKN1A,PSMC5,AKT2,PSMF1,PSMD9,PSMD14,PSMA3,AKT1,GSK3A,TSC2,PSMD10,PSMA1,PSMA4,THEM4,PSMC2,PSMA2,PSMD2,PSMD6,MAPKAP1,NFKBIE,SKP1,PSMA6,CASP9,PSMC6,CUL1,RELA,PSMD11,PSMD12,PSMD7,IKBKB,PSMD5,PSMD1,NR4A1,PHLPP1,BCL10,NFKBIA,CDKN1B,…
REACTOME_DOWNREGULATION_OF_TGF_BETA_RECEPTOR_SIGNALING	-0.265837	-0.552658	0.970362	1	23	21	UBA52,STUB1,RPS27A,PPP1CA,STRAP,PPP1CC,UCHL5,PPP1R15A,MTMR4,PPP1CB,XPO1,SMAD3,PMEPA1,SMURF1,SMURF2,SMAD7,ZFYVE9,TGFB1,TGFBR2,SMAD2,TGFBR1
REACTOME_DOWNREGULATION_OF_SMAD2_3_SMAD4_TRANSCRIPTIONAL_ACTIVITY	-0.313897	-0.639009	0.936194	1	20	19	UBA52,RPS27A,HDAC1,TGIF1,NCOR2,UBE2D3,TGIF2,PARP1,SKI,PPM1A,UBE2D1,SMAD3,SMAD4,SMURF2,USP9X,NCOR1,SMAD2,TRIM33,SKIL
REACTOME_DOUBLE_STRAND_BREAK_REPAIR	-0.31443	-0.661367	0.919355	1	24	21	H2AFX,RPA3,RAD51,LIG1,RPA2,TDP1,RAD52,XRCC6,RPA1,XRCC5,BRCA1,XRCC4,RAD50,MDC1,PRKDC,NBN,TP53BP1,BRIP1,LIG4,BRCA2,ATM
REACTOME_DIABETES_PATHWAYS	-0.246983	-0.587317	0.993988	1	133	110	F2,IGFBP1,IGFALS,IGF2,YIF1A,IGFBP2,EXOSC5,PCSK1,EXOSC7,WFS1,KLHDC3,KLK3,ASNS,ATP6V0D1,DDIT3,STX1A,EXOSC1,PREB,EXOSC2,ARFGAP1,SRPRB,EXOSC8,SPCS1,ACADVL,ATF4,CXXC1,ZBTB17,EXOC3,SERP1,EXOSC3,LMNA,DDX11,GSK3A,HDGF,EXOSC6,CALR,KLF4,SEC11A,KDELR3,TATDN2,EXOSC9,SEC11C,EXOC4,SPCS2,EIF2S1,GOSR2,EXOC6,PPP2R5B,DNAJB11,CUL7,EXTL3,SLC30A5,ATF3,PARN,WIPI1,IGF2BP2,PDIA6,IGFBP4,HSPA5,SSR1,DCTN1,DNAJB9,IGFBP6,MBT…
REACTOME_DOWNSTREAM_TCR_SIGNALING	-0.416516	-0.921359	0.648421	1	37	33	PIK3R2,UBE2N,RELA,RIPK2,IKBKB,BCL10,NFKBIA,CARD11,CD3D,IKBKG,CHUK,MAP3K7,LCK,PRKCQ,PDPK1,PIK3CB,TAB2,TRAF6,PIK3R1,PTEN,HLA-DRB1,MALT1,CD3E,HLA-DRB5,CD247,HLA-DPB1,PIK3CA,HLA-DPA1,HLA-DQA2,CD3G,CD4,HLA-DQA1,TRAT1
REACTOME_INHIBITION_OF_VOLTAGE_GATED_CA2_CHANNELS_VIA_GBETA_GAMMA_SUBUNITS	-0.545974	-1.14699	0.284188	1	25	23	KCNJ9,GNB2,KCNJ12,GNG4,GNG5,GNB1,KCNJ3,GABBR1,GNG10,KCNJ4,KCNJ2,GNG12,GNGT1,GNB3,GNG3,GNG8,GNG7,GNGT2,GNG2,KCNJ10,KCNJ16,KCNJ15,KCNJ5
REACTOME_BOTULINUM_NEUROTOXICITY	-0.42994	-0.876382	0.707237	1	19	18	STX10,STX1A,STX1B,STX5,STX8,STX4,STX3,SYT1,STX16,STX6,VAMP2,VAMP1,STX12,STX7,STX2,STX11,SNAP25,SYT2
REACTOME_INSULIN_RECEPTOR_SIGNALLING_CASCADE	-0.322335	-0.758281	0.909366	1	87	80	PIK3R2,FGF6,EIF4EBP1,RPS6,MLST8,TRIB3,FGFR4,HRAS,MAP2K2,STK11,FGF19,MAPK3,AKT2,PRKAB1,FGFR3,PRKAG1,DOK1,CDK1,TSC2,THEM4,CAB39L,SHC2,STRADB,RHEB,RPTOR,PRKAG2,RAF1,EIF4B,FGF18,IRS2,FGF3,YWHAB,EIF4G1,EIF4E,GRB2,FGF17,TSC1,GRB10,MAP2K1,CRK,NRAS,SHC1,MTOR,PPM1A,EEF2K,MAPK1,INSR,STRADA,FGF23,CAB39,PDPK1,PIK3R4,PIK3CB,FGF20,KRAS,PRKAA1,PIK3R1,PRKAB2,RPS6KB1,PDE3B,SHC3,GAB1,FRS2,PIK3C3,KL,SOS1,FGFR2,IRS1…
REACTOME_NUCLEAR_RECEPTOR_TRANSCRIPTION_PATHWAY	-0.462863	-1.04183	0.437435	1	49	43	NR1I3,NR2F6,NR0B1,NR0B2,ESRRA,NR2C2AP,RORC,THRA,PPARG,NR1H2,NR1I2,NR1D1,NR1H3,RARG,RXRA,RXRB,NR6A1,NRBP1,HNF4A,VDR,PPARD,NR4A1,NRBF2,PPARA,RARA,NR5A2,HNF4G,NR3C2,NR2F1,NR4A2,NR1D2,MED1,THRB,ESRRG,NR5A1,AR,NR2E3,NR3C1,NR4A3,ESR2,ESR1,RORA,PGR
REACTOME_NUCLEAR_EVENTS_KINASE_AND_TRANSCRIPTION_FACTOR_ACTIVATION	-0.324263	-0.684996	0.913793	1	24	24	PPP2R1A,MAPK3,RPS6KA1,PPP2R5D,ELK1,PPP2CA,MAPK7,DUSP6,MAPKAPK2,DUSP7,PPP2CB,DUSP4,MAPK14,PPP2R1B,ATF1,DUSP3,RPS6KA3,MAPK1,RPS6KA2,MAPK11,CREB1,MEF2A,RPS6KA5,MEF2C
REACTOME_NRAGE_SIGNALS_DEATH_THROUGH_JNK	-0.480704	-1.06984	0.386831	1	43	41	RASGRF1,ARHGEF16,BAD,ARHGAP4,NGEF,AATF,OBSCN,RAC1,ARHGEF9,MAGED1,ABR,FGD3,FGD1,KALRN,ARHGEF4,VAV3,ARHGEF11,ARHGEF2,NET1,ECT2,MAPK8,ARHGEF3,ARHGEF18,SOS2,BCL2L11,ITSN1,FGD4,ARHGEF12,TRIO,SOS1,VAV1,PREX1,PLEKHG2,ARHGEF17,RASGRF2,TIAM2,ARHGEF6,NGF,FGD2,NGFR,TIAM1
REACTOME_NOTCH1_INTRACELLULAR_DOMAIN_REGULATES_TRANSCRIPTION	-0.314843	-0.702284	0.904167	1	46	43	HES5,UBA52,HDAC10,RPS27A,TLE2,RBX1,KAT2A,HES1,HDAC11,HDAC3,TLE1,HDAC1,HDAC8,MYC,HDAC6,CDK8,SKP1,NCOR2,CUL1,HDAC5,CCNC,HDAC2,TBL1X,TLE3,SNW1,MAML1,HDAC7,HDAC4,TBL1XR1,MAML3,CREBBP,FBXW7,NCOR1,RBPJ,HEY1,TLE4,MAML2,KAT2B,HIF1A,HEYL,HEY2,MAMLD1,HDAC9
REACTOME_ANTIVIRAL_MECHANISM_BY_IFN_STIMULATED_GENES	-0.252406	-0.580741	0.990909	1	66	60	UBA52,PIN1,RPS27A,MAPK3,AAAS,ISG15,NUP85,NUP37,EIF4A3,IRF3,EIF4E2,RAE1,UBE2N,KPNA2,NUP93,NUP43,NUP88,NUP188,SEH1L,NUP62,NUP35,UBE2E1,UBE2L6,NUPL2,NUP107,NUP210,NUP54,NUP214,NUP155,EIF4G1,KPNB1,PLCG1,EIF4E,NUP133,EIF4G2,KPNA4,NUP205,USP18,MX1,KPNA3,PPM1B,FLNB,POM121,EIF4A1,NUP50,KPNA1,TPR,NUP153,EIF4G3,EIF4E3,JAK1,IFIT1,EIF2AK2,NEDD4,RANBP2,DDX58,MX2,STAT1,KPNA5,HERC5
REACTOME_NOD1_2_SIGNALING_PATHWAY	-0.36773	-0.792113	0.818374	1	30	28	CARD9,CASP1,MAPK13,TAB1,UBE2N,CASP9,RIPK2,MAP2K6,CASP4,CASP2,IKBKB,MAPK14,IKBKG,CASP8,MAPK12,CHUK,MAP3K7,TAB3,NOD1,BIRC2,TAB2,TRAF6,IRAK2,NOD2,MAPK11,TNFAIP3,BIRC3,CYLD
REACTOME_NFKB_AND_MAP_KINASES_ACTIVATION_MEDIATED_BY_TLR4_SIGNALING_REPERTOIRE	-0.277933	-0.640084	0.969543	1	72	68	SAA1,UBA52,MAP2K2,RPS27A,PPP2R1A,NFKBIB,MAPK3,MAPKAPK3,RPS6KA1,MAP2K3,CDK1,TAB1,PPP2R5D,TICAM1,AGER,ELK1,PPP2CA,MAPK7,DUSP6,RELA,JUN,MAP2K7,RIPK2,MAPK9,MAPKAPK2,DUSP7,MAP2K6,PPP2CB,IKBKB,HMGB1,NFKB2,DUSP4,MAPK14,PPP2R1B,ATF1,NFKBIA,APP,RIPK1,IKBKG,MAP2K1,DUSP3,FOS,RPS6KA3,MAP2K4,MAPK8,MAPK1,CHUK,MAP3K7,TAB3,TLR3,NOD1,TLR4,ATF2,TAB2,TRAF6,IRAK2,NOD2,RPS6KA2,MAPK11,CREB1,CD14,S100B,MEF2A,RPS6KA5,S1…
REACTOME_NEUROTRANSMITTER_RELEASE_CYCLE	-0.574432	-1.24222	0.149028	1	34	26	SLC1A7,SYN1,RAB3A,STX1A,SYN3,GAD1,HSPA8,MAOA,DNAJC5,STXBP1,UNC13B,SYN2,SYT1,SLC6A12,ALDH5A1,GLS2,VAMP2,SLC1A1,ABAT,GLS,SLC38A2,SNAP25,SLC6A1,SLC32A1,SLC18A3,SLC18A2
REACTOME_NEUROTRANSMITTER_RECEPTOR_BINDING_AND_DOWNSTREAM_TRANSMISSION_IN_THE_POSTSYNAPTIC_CELL	-0.499409	-1.18507	0.0841683	1	137	115	CHRNA6,GRIN2C,RASGRF1,GABRA4,HRAS,KCNJ9,GNG13,AP2S1,GNB2,GRIN2D,PICK1,KCNJ12,RRAS,RPS6KA1,ADCY8,GNG4,GNG5,PLCB3,AP2A1,AP2A2,CAMKK1,AP2M1,GRIN1,CALM3,DLG3,CALM2,ADCY3,CHRNA5,NEFL,ARHGEF9,CALM1,GNB1,AP2B1,RAF1,ADCY6,NSF,GABRR1,KCNJ3,GABRB1,EPB41L1,CACNG4,PRKCG,GABBR1,RPS6KA6,GABRB3,RPS6KA3,MDM2,MAPK1,GNG10,KCNJ4,CAMK2D,GNAI2,MYO6,KCNJ2,DLG1,GNG12,ADCY9,ADCY2,PDPK1,NCALD,PRKACB,CHRNA1,PRKCA,GNGT1,GN…
REACTOME_NEURONAL_SYSTEM	-0.506248	-1.22039	0.014	1	279	227	KCNG2,CHRNA6,KCNK7,GRIN2C,RASGRF1,GABRA4,KCNG1,HRAS,KCNJ9,GNG13,AP2S1,GNB2,STX10,KCNMB4,GRIN2D,KCNQ4,KCNN4,PANX2,HCN1,SLC1A7,PICK1,KCNJ12,KCNQ1,SYN1,RAB3A,STX1A,RRAS,RPS6KA1,KCNJ11,KCNN2,STX1B,CACNA1B,ABCC8,KCNA10,ADCY8,GNG4,KCNJ14,GNG5,HCN3,SYN3,KCNH3,KCNK9,ALDH2,PLCB3,STX5,GAD1,AP2A1,AP2A2,STX8,CAMKK1,AP2M1,CACNB3,KCNK1,GRIN1,CALM3,STX4,DLG3,HSPA8,KCNH2,CALM2,MAOA,STX3,DNAJC5,ADCY3,KCNF1,KCNK6,…
REACTOME_NEPHRIN_INTERACTIONS	-0.406181	-0.833047	0.748628	1	20	18	PIK3R2,NCK2,ACTN4,NCK1,SPTAN1,ACTN1,WASL,PIK3CB,SPTBN1,IQGAP1,PIK3R1,KIRREL3,CD2AP,PIK3CA,ACTN2,FYN,MAGI2,KIRREL2
REACTOME_NEGATIVE_REGULATORS_OF_RIG_I_MDA5_SIGNALING	-0.223049	-0.487483	0.990586	1	31	28	UBA52,PIN1,RPS27A,ISG15,IRF3,RNF135,UBE2D2,PCBP2,IKBKE,OTUD5,NLRX1,ATG5,UBE2L6,MAVS,UBE2D3,UBE2K,TRAF3,NLRC5,TAX1BP1,ATG12,UBE2D1,TBK1,IFIH1,RNF125,DDX58,TNFAIP3,CYLD,HERC5
REACTOME_INSULIN_RECEPTOR_RECYCLING	-0.339405	-0.706742	0.88267	1	23	22	ATP6V0B,ATP6V1F,ATP6V0D1,TCIRG1,ATP6V0A4,ATP6V0E1,ATP6V1G1,ATP6V1E1,ATP6V1H,ATP6V1E2,ATP6V1D,ATP6V1C2,ATP6V0C,ATP6V0A2,ATP6V1B1,ATP6V1B2,ATP6V1A,INSR,ATP6V1C1,INS,ATP6V0D2,ATP6V1G2
REACTOME_NEF_MEDIATES_DOWN_MODULATION_OF_CELL_SURFACE_RECEPTORS_BY_RECRUITING_THEM_TO_CLATHRIN_ADAPTERS	-0.316881	-0.652544	0.918301	1	21	19	AP1S1,AP2S1,AP1M2,HLA-A,AP2A1,AP2A2,AP1M1,AP2M1,AP1B1,ATP6V1H,AP2B1,B2M,PACS1,CD8B,LCK,AP1G1,AP1S2,CD4,CD28
REACTOME_NCAM_SIGNALING_FOR_NEURITE_OUT_GROWTH	-0.540226	-1.23978	0.0956256	1	64	56	COL2A1,CACNA1S,HRAS,ARTN,MAP2K2,NRTN,MAPK3,COL9A2,PSPN,CDK1,CACNB3,SRC,RAF1,SPTBN2,SPTBN5,COL9A3,AGRN,CACNA1I,CACNB1,YWHAB,GRB2,PTK2,MAP2K1,NRAS,SPTAN1,MAPK1,KRAS,SPTBN1,PRNP,SPTBN4,CREB1,COL9A1,SOS1,CACNB2,CACNA1H,FYN,COL6A2,COL6A1,RPS6KA5,COL4A2,COL4A5,FGFR1,COL4A1,COL1A1,COL5A1,COL4A4,COL1A2,ST8SIA4,COL5A2,ST8SIA2,CACNB4,COL6A3,COL4A3,GFRA1,NCAM1,GDNF
REACTOME_NUCLEAR_SIGNALING_BY_ERBB4	-0.506787	-1.11636	0.320419	1	38	33	RBX1,PSENEN,PSEN2,APH1A,SH2B1,SKP1,CUL1,NCSTN,BTC,WWOX,HBEGF,STAT5A,PSEN1,BTRC,NRG4,STAT5B,EREG,PRLR,APH1B,YAP1,TAB2,ADAM17,NCOR1,S100B,GHR,JAK2,NRG2,CXCL12,GFAP,NRG1,ESR1,PGR,PRL
REACTOME_NUCLEOTIDE_BINDING_DOMAIN_LEUCINE_RICH_REPEAT_CONTAINING_RECEPTOR_NLR_SIGNALING_PATHWAYS	-0.453327	-1.02111	0.479339	1	46	43	PYCARD,CARD9,CASP1,TXN,MAPK13,TAB1,UBE2N,BCL2L1,CASP9,RIPK2,MAP2K6,HSP90AB1,CASP4,CASP2,IKBKB,MAPK14,APP,IKBKG,CASP8,MAPK12,CHUK,MAP3K7,TAB3,NOD1,BIRC2,TAB2,TRAF6,IRAK2,PANX1,NOD2,TXNIP,MAPK11,AIM2,PSTPIP1,TNFAIP3,BIRC3,CYLD,BCL2,NLRP1,MEFV,NLRP3,NLRC4,P2RX7
REACTOME_N_GLYCAN_ANTENNAE_ELONGATION_IN_THE_MEDIAL_TRANS_GOLGI	-0.375648	-0.758959	0.825112	1	18	16	MGAT4B,B4GALT2,B4GALT3,MGAT2,B4GALT4,FUT8,ST6GAL1,MGAT5,B4GALT1,B4GALT5,B4GALT6,MGAT4A,MAN2A1,MGAT3,ST8SIA6,ST8SIA2
REACTOME_OLFACTORY_SIGNALING_PATHWAY	-0.566937	-1.24889	0.09234	1	328	37	OR52E8,OR51B4,OR7D2,OR2W3,OR1F1,OR52B6,OR2L2,OR2AK2,OR2A4,OR51A7,GNB1,OR2T10,OR1N2,GNGT1,OR51E1,OR1J4,OR2A7,OR52D1,OR10H1,GNAL,OR10Q1,OR2B6,OR51E2,OR10A5,OR52H1,OR1J1,OR10A2,OR6A2,OR1L8,OR9A4,OR10A4,OR1J2,OR1Q1,OR52W1,OR1N1,OR2D3,OR2D2
REACTOME_PIP3_ACTIVATES_AKT_SIGNALING	-0.237737	-0.515047	0.986006	1	29	27	MLST8,TRIB3,RPS6KB2,AKT1S1,BAD,CDKN1A,AKT2,AKT1,GSK3A,TSC2,THEM4,MAPKAP1,CASP9,NR4A1,PHLPP1,CDKN1B,FOXO4,MDM2,MTOR,CHUK,PDPK1,PTEN,FOXO3,CREB1,FOXO1,RICTOR,AKT3
REACTOME_PI3K_EVENTS_IN_ERBB4_SIGNALING	-0.314716	-0.691359	0.920419	1	38	35	MLST8,TRIB3,RPS6KB2,AKT1S1,BAD,CDKN1A,AKT2,AKT1,GSK3A,TSC2,THEM4,MAPKAP1,CASP9,BTC,NR4A1,PHLPP1,HBEGF,CDKN1B,FOXO4,NRG4,MDM2,MTOR,EREG,CHUK,PDPK1,PIK3R1,PTEN,FOXO3,CREB1,PIK3CA,FOXO1,RICTOR,NRG2,NRG1,AKT3
REACTOME_PI3K_EVENTS_IN_ERBB2_SIGNALING	-0.286271	-0.635042	0.955533	1	44	41	MLST8,TRIB3,RPS6KB2,EGF,AKT1S1,BAD,ERBB2,CDKN1A,AKT2,AKT1,GSK3A,TSC2,THEM4,MAPKAP1,CASP9,BTC,ERBB3,NR4A1,PHLPP1,HBEGF,GRB2,CDKN1B,FOXO4,NRG4,MDM2,MTOR,EREG,CHUK,PDPK1,PIK3R1,PTEN,FOXO3,GAB1,EGFR,CREB1,PIK3CA,FOXO1,RICTOR,NRG2,NRG1,AKT3
REACTOME_PI3K_CASCADE	-0.364281	-0.835662	0.82377	1	71	64	PIK3R2,FGF6,EIF4EBP1,RPS6,MLST8,TRIB3,FGFR4,STK11,FGF19,AKT2,PRKAB1,FGFR3,PRKAG1,DOK1,TSC2,THEM4,CAB39L,STRADB,RHEB,RPTOR,PRKAG2,EIF4B,FGF18,IRS2,FGF3,EIF4G1,EIF4E,GRB2,FGF17,TSC1,MTOR,PPM1A,EEF2K,INSR,STRADA,FGF23,CAB39,PDPK1,PIK3R4,PIK3CB,FGF20,PRKAA1,PIK3R1,PRKAB2,RPS6KB1,PDE3B,GAB1,FRS2,PIK3C3,KL,FGFR2,IRS1,FGF9,PIK3CA,FGF4,INS,FGFR1,PRKAA2,FGF8,KLB,FGF2,FGF7,FGF1,FGF10
REACTOME_PI3K_AKT_ACTIVATION	-0.219777	-0.483879	0.99267	1	38	35	PIK3R2,MLST8,TRIB3,RPS6KB2,AKT1S1,BAD,CDKN1A,AKT2,AKT1,GSK3A,TSC2,THEM4,MAPKAP1,CASP9,RHOA,IRS2,NR4A1,PHLPP1,CDKN1B,FOXO4,MDM2,MTOR,CHUK,PDPK1,PIK3CB,PIK3R1,PTEN,FOXO3,CREB1,IRS1,PIK3CA,FOXO1,RICTOR,NGF,AKT3
REACTOME_PHOSPHORYLATION_OF_CD3_AND_TCR_ZETA_CHAINS	-0.642729	-1.29944	0.0977528	1	16	15	CSK,CD3D,LCK,HLA-DRB1,CD3E,HLA-DRB5,CD247,HLA-DPB1,PAG1,HLA-DPA1,HLA-DQA2,CD3G,CD4,HLA-DQA1,PTPRC
REACTOME_PHOSPHOLIPID_METABOLISM	-0.236721	-0.570111	1	1	198	179	PIK3R2,PLA2G4D,ARSH,PLA2G1B,DEGS2,GAL3ST1,AGPAT2,ARSE,PCYT2,PEMT,PLA2G10,PTDSS2,NEU4,SMPD2,PLA2G4F,INPP5J,TAZ,PNPLA2,NEU1,GPD1,CRLS1,INPP5E,PLA2G2E,LPCAT4,DGAT2,PLA2G3,PLA2G6,SPHK2,CHKA,SUMF2,PLD6,CSNK1G2,MBOAT7,GLA,SLC44A4,CDIPT,GBA2,PTDSS1,SLC44A3,CHPT1,GLB1,AGPAT5,SMPD3,MTMR14,HADHA,VAC14,LPIN3,CHKB,HEXB,SUMF1,PLA2G16,CTSA,ARSA,PI4KB,PLBD1,INPP5K,SMPD4,AGPAT3,INPPL1,SLC44A2,GNPAT,PIP5K1B,PLA2G…
REACTOME_MYOGENESIS	-0.577051	-1.22089	0.167026	1	28	22	CDH15,TCF3,CTNNA1,MAP2K6,CTNNB1,CDC42,MAPK14,ABL1,TCF12,NEO1,MAPK12,MEF2D,MAPK11,BNIP2,MEF2A,CDON,MEF2C,CDH4,TCF4,BOC,CDH2,NTN3
REACTOME_PHOSPHOLIPASE_C_MEDIATED_CASCADE	-0.530641	-1.20523	0.135524	1	54	50	FGF6,FGFR4,FGF19,PRKAR1B,ADCY8,FGFR3,CALM3,PRKCD,CALM2,ADCY3,CALM1,ADCY6,PRKACA,ITPR3,FGF18,FGF3,PLCG1,FGF17,PRKCG,PRKAR2A,PRKCE,ADCY9,ADCY2,FGF23,FGF20,PRKACB,PRKCA,ADCY4,ADCY1,PRKAR1A,ADCY7,CREB1,KL,FGFR2,FGF9,PRKACG,FGF4,ITPR2,PRKAR2B,FGFR1,ADCY5,FGF8,KLB,PDE1A,FGF2,FGF7,PDE1B,FGF1,FGF10,CAMK4
REACTOME_ANTIGEN_ACTIVATES_B_CELL_RECEPTOR_LEADING_TO_GENERATION_OF_SECOND_MESSENGERS	-0.561285	-1.21707	0.185185	1	29	27	CALM3,CALM2,SYK,CALM1,ITPR3,SH3KBP1,PLCG1,BLNK,GRB2,SHC1,NCK1,LYN,PIK3R1,CBLB,SOS1,CBL,VAV1,FYN,ITPR2,PIK3AP1,PIK3CD,CD79B,CD79A,PLCG2,CD19,BTK,BLK
REACTOME_PD1_SIGNALING	-0.646939	-1.32135	0.0920177	1	18	17	CSK,PTPN6,CD3D,LCK,HLA-DRB1,CD3E,HLA-DRB5,CD247,PDCD1,HLA-DPB1,HLA-DPA1,HLA-DQA2,CD3G,CD4,CD274,HLA-DQA1,PDCD1LG2
REACTOME_P75_NTR_RECEPTOR_MEDIATED_SIGNALLING	-0.324703	-0.75947	0.900202	1	81	71	RASGRF1,UBA52,SMPD2,RPS27A,ARHGEF16,BAD,ARHGAP4,PSENEN,PSEN2,NGEF,ARHGDIA,APH1A,HDAC3,ITGB3BP,HDAC1,YWHAE,AATF,SQSTM1,OBSCN,RAC1,NCSTN,ARHGEF9,RELA,MYD88,MAGED1,RIPK2,RHOA,HDAC2,ABR,FGD3,CASP2,RTN4,CASP3,PRDM4,IKBKB,FGD1,KALRN,ARHGEF4,VAV3,ARHGEF11,PSEN1,NFKBIA,ARHGEF2,NET1,LINGO1,ECT2,MAPK8,ARHGEF3,APH1B,PRKCI,ARHGEF18,TRAF6,ADAM17,SOS2,BCL2L11,ITSN1,FGD4,ARHGEF12,TRIO,SOS1,VAV1,PREX1,PLEKHG2,AR…
REACTOME_ANTIGEN_PROCESSING_CROSS_PRESENTATION	-0.312996	-0.725261	0.931382	1	76	70	PSMB3,UBA52,CYBA,PSMD3,PSMA7,PSMB10,RPS27A,PSMD8,PSMB4,PSMB5,PSMB8,PSMB1,PSMB7,HLA-G,PSMB6,PSMC3,SEC61B,PSMD4,PSMD13,PSMB9,PSMA5,PSMC4,PSMB2,PSME1,PSMC5,PSMF1,SEC61G,HLA-A,PSMD9,HLA-F,PSMD14,PSMA3,PSMD10,PSMA1,PSMA4,CALR,PSMC2,PSMA2,PSMD2,PSMD6,SEC61A1,HLA-C,PSMA6,PSMC6,TAP1,HLA-B,PSMD11,PSMD12,PSMD7,PDIA3,PSMD5,PSMD1,NCF4,SEC61A2,B2M,PSMC1,CTSS,PSME4,ITGB5,TAP2,LNPEP,FCGR1B,ITGAV,NCF2,CD207,MRC2…
REACTOME_O_LINKED_GLYCOSYLATION_OF_MUCINS	-0.24186	-0.547297	0.990693	1	59	49	MUCL1,ST6GALNAC4,GALNT8,MUC12,B3GNT8,GALNTL6,B3GNT4,MUC5AC,B3GNTL1,B3GNT3,MUC5B,GCNT4,B3GNT6,C1GALT1C1,MUC6,ST6GALNAC2,GALNT6,GALNT11,GALNT12,MUC13,GALNT2,MUC17,ST3GAL3,GALNT3,GCNT1,MUC4,GCNT3,GALNT10,B3GNT7,ST6GAL1,GALNT9,GALNT13,ST3GAL2,GALNT14,GALNT7,B4GALT5,C1GALT1,B3GNT9,B3GNT2,GALNT1,MUC7,B3GNT5,GALNT5,MUC15,ST3GAL1,ST6GALNAC3,WBSCR17,MUC21,MUC16
REACTOME_OTHER_SEMAPHORIN_INTERACTIONS	-0.555428	-1.101	0.36942	1	15	15	PLXNA1,PLXNA2,PLXNB3,SEMA4A,SEMA6A,SEMA5A,TYROBP,PLXND1,SEMA7A,ITGB1,SEMA6D,ITGA1,TREM2,SEMA3E,PLXNC1
REACTOME_OPIOID_SIGNALLING	-0.454983	-1.05465	0.372727	1	78	70	PPP1R1B,GNG13,GNB2,PRKAR1B,PPP1CA,PPP2R1A,CDK5,ADCY8,GNG4,GNG5,PLCB3,CALM3,PPP2R5D,PRKCD,CALM2,PPP2CA,ADCY3,CALM1,GNB1,ADCY6,PRKACA,ITPR3,PLCB4,PPP2CB,PPP3R1,PPP2R1B,PRKCG,PRKAR2A,PPP3CB,PLA2G4A,MAPK1,GNG10,POMC,GNAZ,GNAI2,PPP3CA,GNG12,ADCY9,ADCY2,PRKACB,PRKCA,GNGT1,GNB5,ADCY4,ADCY1,GNB3,PRKAR1A,PLCB1,GNG3,ADCY7,CREB1,GNAI1,PLCB2,GNG11,PRKACG,PDE4D,ITPR2,PDE4B,GNG8,PRKAR2B,GNAL,GNG7,GNGT2,ADCY5,G…
REACTOME_AMINO_ACID_TRANSPORT_ACROSS_THE_PLASMA_MEMBRANE	-0.3493	-0.753223	0.863102	1	31	30	SLC38A3,SLC38A5,SLC7A9,SLC1A5,SLC7A5,SLC43A1,SLC38A4,SLC3A2,SLC6A20,SLC3A1,SLC43A2,SLC6A19,SLC7A8,SLC1A4,SLC7A1,SLC6A18,SLC6A12,SLC7A6,SLC38A1,SLC6A14,SLC7A11,SLC38A2,SLC7A7,SLC6A6,SLC36A1,SLC16A10,SLC6A15,SLC7A2,SLC7A3,SLC7A10
REACTOME_MYD88_MAL_CASCADE_INITIATED_ON_PLASMA_MEMBRANE	-0.320955	-0.749967	0.916667	1	83	78	SAA1,UBA52,ECSIT,MAP2K2,SIGIRR,RPS27A,PPP2R1A,NFKBIB,MAPK3,MAPKAPK3,RPS6KA1,MAP2K3,CDK1,TAB1,UBE2N,PPP2R5D,AGER,ELK1,PPP2CA,MAPK7,PELI3,DUSP6,RELA,MYD88,JUN,MAP2K7,RIPK2,MAPK9,MAPKAPK2,DUSP7,MAP2K6,PPP2CB,IKBKB,IRAK4,HMGB1,NFKB2,DUSP4,MAPK14,PPP2R1B,ATF1,NFKBIA,APP,TIRAP,IKBKG,MAP2K1,DUSP3,FOS,RPS6KA3,MAP2K4,MAPK8,MAPK1,CHUK,MAP3K7,TAB3,PELI1,NOD1,TLR4,ATF2,TAB2,TRAF6,IRAK2,NOD2,RPS6KA2,MAPK11,CR…
REACTOME_NEGATIVE_REGULATION_OF_FGFR_SIGNALING	-0.473253	-1.0342	0.467793	1	37	34	FGF6,UBA52,FGFR4,FGF19,RPS27A,PPP2R1A,MAPK3,FGFR3,SPRY2,SRC,PPP2CA,PPP2CB,FGF18,MKNK1,FGF3,GRB2,FGF17,MAPK1,FGF23,FGF20,FRS2,BRAF,KL,CBL,FGFR2,FGF9,FGF4,FGFR1,FGF8,KLB,FGF2,FGF7,FGF1,FGF10
REACTOME_MRNA_3_END_PROCESSING	-0.317184	-0.70175	0.902311	1	35	31	SRSF9,MAGOH,SRSF7,U2AF2,RNPS1,PABPN1,CSTF1,CPSF3,CLP1,SRSF3,CSTF2,SRSF6,NCBP2,SRSF4,DHX38,RBM8A,CSTF3,NCBP1,SRSF5,UPF3B,CPSF7,SRSF1,NFX1,NUDT21,CPSF2,SRRM1,PAPOLA,SRSF11,CDC40,PCF11,U2AF1
REACTOME_LOSS_OF_NLP_FROM_MITOTIC_CENTROSOMES	-0.253014	-0.576975	0.981481	1	59	54	SSNA1,TUBB4B,DCTN3,TUBA4A,TUBG1,PPP2R1A,PLK1,DCTN2,DYNLL1,CETN2,CDK1,NEK2,YWHAE,CSNK1D,TUBB,CEP70,ACTR1A,CEP72,PRKACA,CEP250,OFD1,CEP41,CEP76,HAUS2,PLK4,CEP164,CEP57,HSP90AA1,DCTN1,FGFR1OP,DYNC1I2,CDK5RAP2,CKAP5,MAPRE1,YWHAG,PCNT,CEP63,CENPJ,SDCCAG8,DYNC1H1,PCM1,NEDD1,CLASP1,PAFAH1B1,CNTRL,TUBA1A,NINL,CEP290,CEP192,ALMS1,CEP135,AKAP9,PRKAR2B,TUBB4A
REACTOME_MUSCLE_CONTRACTION	-0.549887	-1.24003	0.119295	1	48	42	TCAP,TNNI3,TNNC2,TNNC1,MYL6,MYL2,MYL6B,MYL12B,CALM3,TNNI1,SORBS3,CALM2,TNNI2,MYBPC1,CALM1,TPM3,MYL3,MYL4,ITGB5,TNNT1,TPM1,TPM4,VCL,TPM2,DMD,ACTN2,ACTG2,MYL9,SORBS1,ITGA1,DES,ACTA2,TNNT2,VIM,LMOD1,MYLK,MYH3,TMOD1,CALD1,MYH11,MYBPC2,NEB
REACTOME_LATENT_INFECTION_OF_HOMO_SAPIENS_WITH_MYCOBACTERIUM_TUBERCULOSIS	-0.52175	-1.13764	0.274262	1	33	30	ATP6V0B,CYBA,ATP6V1F,ATP6V0D1,TCIRG1,ATP6V0A4,ATP6V0E1,NOS2,ATP6V1G1,ATP6V1E1,ATP6V1H,ATP6V1E2,ATP6V1D,ATP6V1C2,ATP6V0C,NCF4,ATP6V0A2,ATP6V1B1,NOS3,ATP6V1B2,ATP6V1A,ATP6V1C1,LTF,NCF2,SLC11A1,CAMP,CYBB,ATP6V0D2,ATP6V1G2,NOS1
REACTOME_KINESINS	-0.254981	-0.535317	0.980241	1	24	22	KIF9,KIF22,KIFC1,KLC4,KIF26A,KIF2C,KIF20A,KLC2,RACGAP1,KLC3,KLC1,KIF4A,KIF23,KIF18A,KIF15,KIF11,KIFAP3,KIF3B,KIF5B,KIF2A,KIF3C,KIF5A
REACTOME_KERATAN_SULFATE_KERATIN_METABOLISM	-0.557039	-1.19875	0.202944	1	30	29	B3GNT4,B4GALT2,B4GALT3,B3GNT3,GLB1,HEXB,B4GALT4,ST3GAL3,B3GNT7,HEXA,ST3GAL2,CHST5,B4GALT1,B4GALT5,B4GALT6,B3GNT2,GNS,FMOD,CHST2,ST3GAL1,CHST6,ACAN,KERA,CHST1,LUM,PRELP,ST3GAL6,OGN,OMD
REACTOME_KERATAN_SULFATE_BIOSYNTHESIS	-0.584992	-1.24242	0.15229	1	26	25	B3GNT4,B4GALT2,B4GALT3,B3GNT3,B4GALT4,ST3GAL3,B3GNT7,ST3GAL2,CHST5,B4GALT1,B4GALT5,B4GALT6,B3GNT2,FMOD,CHST2,ST3GAL1,CHST6,ACAN,KERA,CHST1,LUM,PRELP,ST3GAL6,OGN,OMD
REACTOME_JNK_C_JUN_KINASES_PHOSPHORYLATION_AND_ACTIVATION_MEDIATED_BY_ACTIVATED_HUMAN_TAK1	-0.497702	-0.993118	0.521984	1	16	15	TAB1,MAP2K7,RIPK2,MAPK9,IKBKG,MAP2K4,MAPK8,MAP3K7,TAB3,NOD1,TAB2,TRAF6,IRAK2,NOD2,MAPK10
REACTOME_ION_TRANSPORT_BY_P_TYPE_ATPASES	-0.459603	-0.994421	0.545748	1	34	28	FXYD2,ATP2B2,ATP2A1,ATP12A,ATP1B3,ATP1B1,ATP1A1,ATP2A3,ATP2C2,ATP7B,ATP11A,ATP10B,ATP9B,ATP8B3,ATP2A2,ATP2C1,ATP8B1,ATP9A,ATP11B,ATP8A1,ATP7A,ATP1A3,ATP11C,ATP10D,ATP10A,ATP1A2,ATP1B2,ATP8B4
REACTOME_ION_CHANNEL_TRANSPORT	-0.534654	-1.19461	0.14715	1	55	43	FXYD2,ATP2B2,GABRA4,ATP2A1,ATP12A,ATP1B3,ATP1B1,ATP1A1,ATP2A3,ATP2C2,ARHGEF9,ATP7B,GABRR1,ATP11A,GABRB1,ATP10B,ATP9B,ATP8B3,ATP2A2,ATP2C1,GABRB3,GLRA2,ATP8B1,ATP9A,ATP11B,ATP8A1,ATP7A,ATP1A3,GABRA2,ATP11C,ATP10D,GABRB2,GABRA3,GABRG3,ATP10A,HTR3A,HTR3C,GABRG2,ATP1A2,ATP1B2,GLRB,GABRR2,ATP8B4
REACTOME_INTERFERON_SIGNALING	-0.39178	-0.930902	0.701702	1	159	135	SOCS1,UBA52,IFI27,IFITM2,PIN1,RPS27A,IFITM3,PSMB8,IFITM1,MAPK3,HLA-G,AAAS,ISG15,GBP7,NUP85,NUP37,EIF4A3,IP6K2,IRF3,EIF4E2,HLA-A,HLA-F,IFI35,TYK2,RAE1,UBE2N,IRF7,KPNA2,PTPN6,OASL,PRKCD,NUP93,IFNGR2,OAS1,NUP43,NUP88,NUP188,SEH1L,HLA-C,NUP62,NUP35,MT2A,IRF6,HLA-B,PML,UBE2E1,UBE2L6,NUPL2,SUMO1,NUP107,CD44,NUP210,NUP54,NUP214,PTPN2,IFNGR1,IRF2,IRF1,ISG20,NUP155,IRF5,EIF4G1,KPNB1,PLCG1,EIF4E,IRF8,NUP13…
REACTOME_INTERFERON_GAMMA_SIGNALING	-0.555133	-1.27719	0.0519878	1	63	59	SOCS1,HLA-G,GBP7,IRF3,HLA-A,HLA-F,IRF7,PTPN6,OASL,PRKCD,IFNGR2,OAS1,HLA-C,MT2A,IRF6,HLA-B,PML,SUMO1,CD44,PTPN2,IFNGR1,IRF2,IRF1,IRF5,IRF8,B2M,PTPN1,IRF9,CAMK2D,OAS3,PIAS1,SP100,JAK1,HLA-DRB1,OAS2,STAT1,HLA-DRB5,GBP2,HLA-DPB1,JAK2,FCGR1B,SOCS3,HLA-DPA1,ICAM1,GBP1,CIITA,IFNG,PTAFR,HLA-DQA2,GBP4,HLA-DQA1,CAMK2B,VCAM1,IRF4,FCGR1A,GBP5,NCAM1,CAMK2A,GBP6
REACTOME_INTERFERON_ALPHA_BETA_SIGNALING	-0.284403	-0.646757	0.963001	1	64	49	SOCS1,IFI27,IFITM2,IFITM3,PSMB8,IFITM1,HLA-G,ISG15,IP6K2,IRF3,HLA-A,HLA-F,IFI35,TYK2,IRF7,PTPN6,OASL,OAS1,HLA-C,IRF6,HLA-B,IRF2,IRF1,ISG20,IRF5,IRF8,PTPN1,USP18,MX1,IFI6,IRF9,IFNAR1,ADAR,OAS3,IFNAR2,RNASEL,JAK1,IFIT1,IFIT3,EGR1,OAS2,MX2,STAT1,STAT2,GBP2,IFIT2,SOCS3,XAF1,IRF4
REACTOME_INTEGRIN_CELL_SURFACE_INTERACTIONS	-0.389397	-0.904701	0.725253	1	79	74	FGG,FGA,VTN,FGB,ITGA2B,COL2A1,BSG,CSK,ITGB4,BCAR1,AKT1,SRC,ITGA3,ITGAE,SYK,F11R,ICAM2,RAPGEF3,CDH1,GRB2,PTK2,PTPN1,CRK,SHC1,ITGB5,RAP1B,ITGA9,RAP1A,LAMA1,PDPK1,ITGB7,LAMB1,ITGA2,SOS1,LAMB2,ITGB8,RAPGEF4,ITGB1,ICAM1,LAMC1,ITGA1,VWF,COL4A2,COL4A5,JAM3,ITGAV,PECAM1,ITGB2,ITGAL,COL4A1,ITGA5,APBB1IP,THBS1,ICAM3,ITGAX,ITGA8,RASGRP2,SPP1,COL1A1,FN1,ITGA11,LAMA2,VCAM1,COL4A4,COL1A2,IBSP,ITGAM,TNC,JAM2,CO…
REACTOME_INTEGRATION_OF_ENERGY_METABOLISM	-0.298721	-0.70259	0.969	1	120	111	SLC2A2,GCGR,KCNG2,SLC25A6,SLC25A5,PKLR,MLXIPL,PCSK1,GNG13,GNB2,TKT,STK11,CDX2,PRKAR1B,TALDO1,PPP2R1A,SLC25A4,STX1A,KCNJ11,ABCC8,ADCY8,GNG4,GNG5,SPCS1,MLX,FASN,PLCB3,SLC2A1,CACNB3,GNAS,PPP2R5D,GNA11,PPP2CA,ADCY3,SEC11A,PRKAG2,GNA15,GNB1,ADCY6,SEC11C,PRKACA,STXBP1,SPCS2,ITPR3,PPP2CB,CTNNB1,DPP4,RAPGEF3,ACACA,ACLY,PAX6,PPP2R1B,ISL1,GNA14,PRKAR2A,SPCS3,VAMP2,RAP1B,GNG10,CHRM3,GNAI2,RAP1A,ACACB,ADRA2A…
REACTOME_INSULIN_SYNTHESIS_AND_PROCESSING	-0.420649	-0.85773	0.73141	1	21	18	PCSK1,STX1A,EXOC3,EXOC4,EXOC6,SLC30A5,EXOC1,CPE,VAMP2,EXOC2,KIF5B,EXOC8,SLC30A7,RAB27A,EXOC5,INS,SNAP25,MYO5A
REACTOME_MAPK_TARGETS_NUCLEAR_EVENTS_MEDIATED_BY_MAP_KINASES	-0.362611	-0.793212	0.818278	1	30	30	PPP2R1A,MAPK3,RPS6KA1,PPP2R5D,ELK1,PPP2CA,MAPK7,DUSP6,JUN,MAPK9,MAPKAPK2,DUSP7,PPP2CB,DUSP4,MAPK14,PPP2R1B,ATF1,DUSP3,FOS,RPS6KA3,MAPK8,MAPK1,ATF2,RPS6KA2,MAPK11,CREB1,MEF2A,RPS6KA5,MEF2C,MAPK10
REACTOME_MAP_KINASE_ACTIVATION_IN_TLR_CASCADE	-0.341608	-0.770979	0.873181	1	50	48	MAP2K2,PPP2R1A,MAPK3,MAPKAPK3,RPS6KA1,MAP2K3,CDK1,TAB1,PPP2R5D,ELK1,PPP2CA,MAPK7,DUSP6,JUN,MAP2K7,RIPK2,MAPK9,MAPKAPK2,DUSP7,MAP2K6,PPP2CB,DUSP4,MAPK14,PPP2R1B,ATF1,IKBKG,MAP2K1,DUSP3,FOS,RPS6KA3,MAP2K4,MAPK8,MAPK1,MAP3K7,TAB3,NOD1,ATF2,TAB2,TRAF6,IRAK2,NOD2,RPS6KA2,MAPK11,CREB1,MEF2A,RPS6KA5,MEF2C,MAPK10
REACTOME_BASIGIN_INTERACTIONS	-0.495845	-1.04493	0.441048	1	30	22	SLC7A9,PPIA,SLC7A5,BSG,SLC3A2,ATP1B3,ATP1B1,ITGA3,PPIL2,SLC7A8,SLC16A1,SLC7A6,SLC16A8,SLC7A11,SLC7A7,L1CAM,ITGB1,CAV1,MMP1,SPN,ATP1B2,SLC7A10
REACTOME_ASPARAGINE_N_LINKED_GLYCOSYLATION	-0.246268	-0.572495	0.988878	1	81	78	DPM3,ALG3,DPM2,MGAT4B,PMM1,SEC13,ALG14,DOLPP1,B4GALT2,GMPPB,B4GALT3,PREB,GMPPA,ALG5,ALG12,RPN1,DOLK,DDOST,DAD1,PRKCSH,MAN1B1,ALG1,EDEM2,MPI,DPAGT1,MOGS,ALG2,RFT1,CALR,ALG8,MGAT2,RPN2,MLEC,DPM1,SAR1B,MGAT1,B4GALT4,STT3A,GNPNAT1,GANAB,ALG13,ALG6,PDIA3,FUT8,ST6GAL1,ALG9,PMM2,SEC24B,SEC24C,MGAT5,PGM3,CANX,B4GALT1,B4GALT5,UGGT1,B4GALT6,MCFD2,UGGT2,SEC31A,MANEA,ALG10,SEC24D,EDEM1,MGAT4A,EDEM3,MAN2A1,AL…
REACTOME_MITOTIC_G2_G2_M_PHASES	-0.174467	-0.406521	1	1	81	75	SSNA1,PKMYT1,TUBB4B,DCTN3,TUBA4A,E2F1,TUBG1,PPP2R1A,CCNB1,PLK1,CCNB2,CDC25C,CDC25B,TUBGCP2,DCTN2,DYNLL1,CETN2,CDC25A,TUBGCP6,CDK7,CCNA2,CDK1,NEK2,YWHAE,CSNK1D,CCNH,TUBB,CEP70,ACTR1A,CEP72,PRKACA,CDK2,TUBG2,MNAT1,CEP250,OFD1,TUBGCP3,CEP41,CEP76,HAUS2,PLK4,CEP164,CEP57,HSP90AA1,DCTN1,FGFR1OP,DYNC1I2,TUBGCP5,NUMA1,CDK5RAP2,CKAP5,MAPRE1,YWHAG,PCNT,E2F3,CEP63,CENPJ,SDCCAG8,XPO1,WEE1,DYNC1H1,PCM1,NEDD1…
REACTOME_APOPTOSIS	-0.287012	-0.68402	0.98497	1	148	136	PSMB3,UBA52,BID,PSMD3,E2F1,PSMA7,PSMB10,RPS27A,PSMD8,PSMB4,PSMB5,PSMB8,PSMB1,BAX,PSMB7,TRADD,PSMB6,PSMC3,PSMD4,BAD,BCAP31,PSMD13,PSMB9,PSMA5,PSMC4,TP53,PSMB2,PSME1,PSMC5,DFFB,CASP6,PSMF1,FADD,BAK1,DYNLL1,GZMB,TRAF2,DAPK2,PSMD9,LMNA,PSMD14,PSMA3,AKT1,HMGB2,PSMD10,PSMA1,BCL2L1,FNTA,PSMA4,CYCS,PSMC2,PSMA2,TFDP1,TNFRSF1A,TNFRSF10B,PRKCD,DFFA,PSMD2,DYNLL2,PSMD6,PKP1,PSMA6,DIABLO,CASP9,PSMC6,LMNB1,NMT1…
REACTOME_APOPTOTIC_CLEAVAGE_OF_CELLULAR_PROTEINS	-0.403319	-0.887773	0.696617	1	40	36	BCAP31,CASP6,LMNA,FNTA,PRKCD,PKP1,LMNB1,MAPT,PLEC,STK24,CASP7,TJP2,CASP3,CTNNB1,CDH1,ACIN1,PTK2,ADD1,OCLN,CASP8,DSG2,SPTAN1,GSN,ROCK1P1,GAS2,PRKCQ,DSP,BIRC2,SATB1,DSG3,TJP1,APC,ROCK1,BMX,VIM,DSG1
REACTOME_APOPTOTIC_EXECUTION_PHASE	-0.466282	-1.05647	0.415893	1	54	50	BCAP31,DFFB,CASP6,LMNA,HMGB2,FNTA,PRKCD,DFFA,PKP1,LMNB1,MAPT,PLEC,STK24,CASP7,TJP2,CASP3,CTNNB1,HMGB1,CDH1,KPNB1,ACIN1,DNM1L,PTK2,ADD1,OCLN,CASP8,DSG2,H1F0,SPTAN1,GSN,KPNA1,PAK2,ROCK1P1,GAS2,PRKCQ,DSP,BIRC2,SATB1,DSG3,TJP1,APC,ROCK1,HIST1H1C,BMX,VIM,HIST1H1A,DSG1,HIST1H1E,HIST1H1D,HIST1H1B
REACTOME_MHC_CLASS_II_ANTIGEN_PRESENTATION	-0.31619	-0.740206	0.925628	1	91	85	SH3GL2,AP1S1,DCTN3,AP2S1,AP1M2,CLTA,RILP,SEC13,ACTR1B,KIF22,DCTN2,DYNLL1,KLC4,DNM2,KIF26A,AP2A1,AP2A2,KIF2C,KIF20A,AP1M1,AP2M1,KLC2,CTSH,AP1B1,CTSA,RACGAP1,DYNLL2,DCTN6,KLC3,RAB7A,ACTR1A,SAR1B,DCTN5,AP2B1,SPTBN2,KLC1,DYNC2LI1,KIF4A,KIF23,DCTN4,KIF18A,LGMN,KIF15,CTSD,DNM1,DCTN1,KIF11,DYNC1I2,CTSC,SEC24B,SEC24C,CTSS,KIFAP3,CLTC,KIF3B,CANX,KIF5B,HLA-DMA,DYNC1H1,CTSB,AP1G1,OSBPL1A,SEC31A,KIF2A,CD74,C…
REACTOME_METAL_ION_SLC_TRANSPORTERS	-0.266139	-0.555436	0.966774	1	22	21	SLC39A4,SLC39A3,SLC30A2,SLC39A2,SLC39A5,SLC40A1,SLC39A1,SLC39A8,HEPH,SLC39A7,SLC31A1,SLC30A5,CP,SLC39A10,SLC30A1,SLC41A1,SLC41A2,SLC30A7,SLC39A6,SLC11A1,SLC30A3
REACTOME_AQUAPORIN_MEDIATED_TRANSPORT	-0.486817	-1.10853	0.303534	1	51	46	GNG13,GNB2,PRKAR1B,ADCY8,GNG4,GNG5,GNAS,ADCY3,RAB11A,GNB1,ADCY6,PRKACA,AQP3,AQP7,PRKAR2A,MYO5B,GNG10,AQP5,GNG12,ADCY9,ADCY2,PRKACB,GNGT1,AQP6,AQP8,GNB5,ADCY4,ADCY1,GNB3,PRKAR1A,GNG3,ADCY7,AQP1,RAB11FIP2,AVPR2,GNG11,PRKACG,AQP10,GNG8,PRKAR2B,GNG7,GNGT2,ADCY5,GNG2,AQP9,GNB4
REACTOME_ARMS_MEDIATED_ACTIVATION	-0.32911	-0.666887	0.897351	1	17	16	HRAS,MAP2K2,MAPK3,CDK1,RAF1,YWHAB,MAP2K1,CRK,NRAS,MAPK1,RAP1A,RAPGEF1,KRAS,BRAF,KIDINS220,NGF
REACTOME_YAP1_AND_WWTR1_TAZ_STIMULATED_GENE_EXPRESSION	-0.435054	-0.929713	0.622601	1	24	23	NPPA,TEAD4,RXRA,TEAD2,TEAD3,TGS1,TBL1X,PPARA,NCOA6,SMARCD3,TBL1XR1,YAP1,CREBBP,NCOA1,MED1,NCOA2,NCOA3,TEAD1,KAT2B,CTGF,RUNX2,WWTR1,TBX5
REACTOME_VOLTAGE_GATED_POTASSIUM_CHANNELS	-0.5933	-1.29945	0.0764331	1	43	31	KCNG2,KCNG1,KCNQ4,KCNQ1,KCNA10,KCNH3,KCNH2,KCNF1,KCNAB2,KCNA2,KCNC4,KCNH8,KCNH6,KCNS3,KCNH4,KCNC2,KCNV1,KCNC3,KCNAB3,KCNS1,KCNG3,KCND3,KCND1,KCNB2,KCNQ2,KCNB1,KCNA5,KCNQ3,KCNA3,KCNAB1,KCNV2
REACTOME_MEMBRANE_TRAFFICKING	-0.156644	-0.372149	1	1	129	118	UBA52,SH3GL2,COPE,AP1S1,BLOC1S1,GJB1,VPS28,AP1M2,GJB5,GJC2,RPS27A,CLTB,CLTA,TPD52L1,VAMP8,GJB3,FTH1,CHMP2A,SEC13,VPS25,SNF8,PREB,COPZ1,ARFGAP1,HGS,DNM2,FTL,SNAPIN,BLOC1S3,VPS37B,CHMP4C,VPS37D,CHMP6,GAK,CHMP4B,NAPA,DTNBP1,HIP1R,AP4B1,AP1M1,VPS4A,AP2M1,AP1B1,SRC,STX4,TSG101,HSPA8,SNX5,RAB5C,CHMP5,VPS37C,CHMP4A,SAR1B,DNASE2,ARRB1,NECAP1,CTSZ,CHMP7,GJA3,OCRL,M6PR,GJB4,TFRC,TPD52,YIPF6,COPB1,AP3S1,VTA…
REACTOME_METABOLISM_OF_CARBOHYDRATES	-0.328977	-0.794412	0.969	1	247	217	G6PC,SLC2A2,GYS2,GCKR,LCT,SLC25A10,CHST9,GALK1,PGLS,CHST13,SLC25A1,IDUA,PKLR,GAPDH,B4GALT7,GALE,PCK2,TKT,MDH2,ALDOA,G6PC3,TPI1,PFKL,B3GALT6,HYAL1,TALDO1,PPP2R1A,ALDOC,B3GAT3,SLC25A11,TREH,KHK,GOT1,HYAL2,B3GNT4,GPI,NAGLU,B4GALT2,AAAS,SLC37A4,ALDOB,B4GALT3,ENO3,GUSB,G6PD,PC,PYGB,HS3ST6,FBP1,NUP85,PGD,NUP37,SGSH,ENO1,B3GNT3,GPC3,PHKG2,GOT2,RPIA,SLC5A1,SDC1,GALT,HS3ST1,GYS1,CHPF,PFKP,PGK1,MDH1,PFKM,G…
REACTOME_MEIOTIC_SYNAPSIS	-0.750913	-1.72396	0	1000000000	73	63	H2AFX,H2AFZ,HSPA2,ACD,LMNA,UBE2I,LMNB1,HIST1H4I,HIST1H2AC,REC8,POT1,TINF2,TERF2,BRCA1,HIST1H2BD,DIDO1,HIST1H2BK,TERF1,SMC1A,SUN2,ATR,STAG2,HIST1H4J,SMC3,HIST2H2BE,STAG1,SYNE2,HIST1H2BH,STAG3,HIST1H2AE,HIST3H3,SMC1B,HIST2H4A,HIST3H2BB,HIST1H2BJ,HIST2H2AC,HIST1H4H,HIST4H4,HIST1H2BN,HIST1H4K,HIST1H2BG,HIST1H2BC,TEX12,HIST1H2AD,HIST1H2BE,SYCP2,HIST1H4F,HIST1H2BL,HIST1H4A,SYCP3,HIST1H4E,HIST1H2BF,SYNE…
REACTOME_CHROMOSOME_MAINTENANCE	-0.689744	-1.63932	0	1000000000	122	107	RUVBL2,H2AFX,POLD2,POLD1,NHP2,RFC2,TERT,H2AFZ,HSPA2,OIP5,PCNA,CENPA,RPA3,ACD,RUVBL1,WRAP53,POLA2,CENPH,FEN1,RBBP7,HJURP,LMNA,RFC4,UBE2I,CENPN,ITGB3BP,LIG1,POLE2,NPM1,POLD4,RPA2,MIS18A,POLE,PRIM1,CENPO,RFC3,LMNB1,CENPK,RFC5,HIST1H4I,HIST1H2AC,CENPP,REC8,PRIM2,POT1,RBBP4,TINF2,TERF2,CENPQ,RPA1,DNA2,BRCA1,POLD3,HIST1H2BD,DIDO1,HIST1H2BK,POLA1,CENPI,TERF1,SMC1A,SMARCA5,SUN2,ATR,STAG2,HIST1H4J,SMC3,MI…
REACTOME_DEPOSITION_OF_NEW_CENPA_CONTAINING_NUCLEOSOMES_AT_THE_CENTROMERE	-0.7668	-1.75206	0	1000000000	64	56	H2AFX,H2AFZ,OIP5,CENPA,RUVBL1,CENPH,RBBP7,HJURP,CENPN,ITGB3BP,NPM1,MIS18A,CENPO,CENPK,HIST1H4I,HIST1H2AC,CENPP,RBBP4,CENPQ,HIST1H2BD,HIST1H2BK,CENPI,SMARCA5,HIST1H4J,MIS18BP1,HIST2H2BE,RSF1,HIST1H2BH,HIST1H2AE,HIST2H4A,HIST3H2BB,HIST1H2BJ,HIST2H2AC,HIST1H4H,HIST4H4,HIST1H2BN,HIST1H4K,HIST1H2BG,HIST1H2BC,HIST1H2AD,HIST1H2BE,HIST1H4F,HIST1H2BL,HIST1H4A,HIST1H4E,HIST1H2BF,HIST1H4B,HIST1H2BO,HIST1H2A…
REACTOME_EXTRACELLULAR_MATRIX_ORGANIZATION	-0.625066	-1.45704	0	1000000000	87	73	KLKB1,MMP8,PRSS2,COL2A1,CTRB1,PRSS1,PLOD3,COL9A2,MMP15,ELANE,COL11A2,P4HB,CRTAP,PPIB,FURIN,MMP7,COL9A3,PLOD1,TIMP1,COL28A1,SERPINH1,MMP17,MMP24,BMP1,COL27A1,TPSAB1,KLK2,COL9A1,ADAMTS14,MMP10,TLL2,PLOD2,MMP25,MMP11,PCOLCE,COL6A2,MMP3,COL16A1,COL6A1,MMP14,CTRB2,COL4A2,COL4A5,MMP1,COL5A3,COL4A1,MMP9,ADAMTS2,PCOLCE2,COL1A1,TIMP2,MMP2,COL5A1,COL15A1,COL4A4,COL1A2,COL8A2,COL5A2,COL12A1,COL6A3,COL13A1,C…
REACTOME_TRANSCRIPTION	-0.610949	-1.47596	0	1000000000	210	182	POLR2I,POLR2L,H2AFX,POLR2J,SNRPF,POLR2G,TAF10,POLRMT,SNRPB,POLR2H,LSM10,POLR3K,POLR1C,MAPK3,POLR2E,ERCC2,SNRPG,H2AFZ,GTF3C5,GTF2E2,POLR1D,TAF9,SRSF9,SUPT4H1,BRF2,MAGOH,SNRPE,EHMT2,BRF1,POLR2C,SRSF7,POLR3H,GTF2F1,GTF2H2,SNAPC2,GTF2A2,U2AF2,SNAPC4,CDK7,SLBP,RNPS1,SNRPD3,GTF2F2,TAF12,TAF1C,POLR3E,TFB2M,PABPN1,POLR3C,POLR2D,CSTF1,POLR2K,CPSF3,CLP1,SRSF3,CCNH,SUPT5H,POLR3B,GTF2B,SSRP1,POLR3D,TBP,CSTF2…
REACTOME_NITRIC_OXIDE_STIMULATES_GUANYLATE_CYCLASE	-0.736603	-1.56772	0.00214133	1000000000	25	25	KCNMB4,NOS2,PDE9A,NOS3,PDE3B,PDE6A,PDE3A,KCNMB3,PDE5A,PRKG2,PDE11A,GUCY1B3,PRKG1,KCNMB1,MRVI1,PDE10A,PDE6G,PDE1A,GUCY1A3,PDE6B,PDE2A,GUCY1A2,KCNMB2,NOS1,PDE1B
REACTOME_RNA_POL_I_PROMOTER_OPENING	-0.793019	-1.8131	0	1000000000	62	53	H2AFX,MAPK3,H2AFZ,HIST1H4I,HIST1H2AC,UBTF,HIST1H2BD,HIST1H2BK,MBD2,H3F3A,HIST1H3E,HIST2H3C,HIST1H4J,HIST2H2BE,HIST1H2BH,HIST1H3H,HIST1H2AE,HIST2H4A,HIST3H2BB,HIST1H3D,HIST1H2BJ,HIST1H3G,HIST2H2AC,HIST1H4H,HIST4H4,HIST1H2BN,HIST1H4K,HIST1H2BG,HIST1H2BC,HIST1H2AD,HIST1H2BE,HIST2H3D,HIST1H4F,HIST1H2BL,HIST1H4A,HIST1H4E,HIST1H2BF,HIST1H3J,HIST1H3I,HIST1H4B,HIST1H2BO,HIST1H3C,HIST1H3A,HIST1H3F,HIST1H2…
REACTOME_COLLAGEN_FORMATION	-0.690656	-1.56661	0	1000000000	58	46	COL2A1,PLOD3,COL9A2,COL11A2,P4HB,CRTAP,PPIB,COL9A3,PLOD1,COL28A1,SERPINH1,BMP1,COL27A1,COL9A1,ADAMTS14,TLL2,PLOD2,PCOLCE,COL6A2,COL16A1,COL6A1,COL4A2,COL4A5,COL5A3,COL4A1,ADAMTS2,PCOLCE2,COL1A1,COL5A1,COL15A1,COL4A4,COL1A2,COL8A2,COL5A2,COL12A1,COL6A3,COL13A1,COL4A3,COL23A1,COL14A1,COL8A1,COL11A1,COL10A1,COL22A1,COL24A1,COL21A1
REACTOME_CGMP_EFFECTS	-0.733111	-1.50347	0.00662983	1000000000	19	19	KCNMB4,PDE9A,PDE3B,PDE6A,PDE3A,KCNMB3,PDE5A,PRKG2,PDE11A,PRKG1,KCNMB1,MRVI1,PDE10A,PDE6G,PDE1A,PDE6B,PDE2A,KCNMB2,PDE1B
REACTOME_RNA_POL_I_RNA_POL_III_AND_MITOCHONDRIAL_TRANSCRIPTION	-0.699267	-1.64913	0	1000000000	122	108	POLR2L,H2AFX,POLRMT,POLR2H,POLR3K,POLR1C,MAPK3,POLR2E,ERCC2,H2AFZ,GTF3C5,POLR1D,BRF2,EHMT2,BRF1,POLR3H,GTF2H2,SNAPC2,SNAPC4,CDK7,TAF1C,POLR3E,TFB2M,POLR3C,POLR2K,CCNH,POLR3B,POLR3D,TBP,SNAPC5,HIST1H4I,ERCC3,HIST1H2AC,POLR3F,GTF3C2,POLR3A,CBX3,POLR1B,MNAT1,ZNF143,POLR1A,UBTF,GTF3C3,GTF2H3,GTF2H1,TFAM,RRN3,SSB,HIST1H2BD,SNAPC3,HIST1H2BK,POLR3GL,SNAPC1,MBD2,TAF1A,TAF1B,H3F3A,GTF3C4,HIST1H3E,NFIB,HIS…
REACTOME_MEIOSIS	-0.72486	-1.7019	0	1000000000	116	96	H2AFX,CDK4,H2AFZ,HSPA2,RPA3,ACD,SPO11,MND1,RAD51,LMNA,UBE2I,RPA2,RAD51C,LMNB1,HIST1H4I,HIST1H2AC,MSH5,MLH1,CDK2,REC8,POT1,TINF2,TERF2,RPA1,BRCA1,HIST1H2BD,DIDO1,BLM,HIST1H2BK,MLH3,TOP3A,RAD50,TERF1,H3F3A,SMC1A,HIST1H3E,SUN2,ATR,STAG2,HIST2H3C,NBN,HIST1H4J,SMC3,HIST2H2BE,BRCA2,DMC1,STAG1,SYNE2,ATM,HIST1H2BH,STAG3,HIST1H3H,HIST1H2AE,HIST3H3,SMC1B,HIST2H4A,HIST3H2BB,HIST1H3D,HIST1H2BJ,HIST1H3G,HIST2…
REACTOME_TELOMERE_MAINTENANCE	-0.747158	-1.73786	0	1000000000	75	69	RUVBL2,H2AFX,POLD2,POLD1,NHP2,RFC2,TERT,H2AFZ,PCNA,RPA3,ACD,RUVBL1,WRAP53,POLA2,FEN1,RFC4,LIG1,POLE2,POLD4,RPA2,POLE,PRIM1,RFC3,RFC5,HIST1H4I,HIST1H2AC,PRIM2,POT1,TINF2,TERF2,RPA1,DNA2,POLD3,HIST1H2BD,HIST1H2BK,POLA1,TERF1,HIST1H4J,HIST2H2BE,HIST1H2BH,HIST1H2AE,HIST3H3,HIST2H4A,HIST3H2BB,HIST1H2BJ,HIST2H2AC,HIST1H4H,HIST4H4,HIST1H2BN,HIST1H4K,HIST1H2BG,HIST1H2BC,HIST1H2AD,HIST1H2BE,HIST1H4F,HIST1…
REACTOME_PACKAGING_OF_TELOMERE_ENDS	-0.793402	-1.78691	0	1000000000	48	43	H2AFX,H2AFZ,ACD,HIST1H4I,HIST1H2AC,POT1,TINF2,TERF2,HIST1H2BD,HIST1H2BK,TERF1,HIST1H4J,HIST2H2BE,HIST1H2BH,HIST1H2AE,HIST3H3,HIST2H4A,HIST3H2BB,HIST1H2BJ,HIST2H2AC,HIST1H4H,HIST4H4,HIST1H2BN,HIST1H4K,HIST1H2BG,HIST1H2BC,HIST1H2AD,HIST1H2BE,HIST1H4F,HIST1H2BL,HIST1H4A,HIST1H4E,HIST1H2BF,HIST1H4B,HIST1H2BO,HIST1H2AB,HIST1H2AJ,HIST1H4D,HIST1H2BI,HIST1H2BM,HIST1H4C,HIST1H4L,HIST1H2BB
REACTOME_RNA_POL_I_TRANSCRIPTION	-0.744284	-1.73025	0	1000000000	89	77	H2AFX,POLR2H,POLR1C,MAPK3,ERCC2,H2AFZ,POLR1D,EHMT2,GTF2H2,CDK7,TAF1C,POLR2K,CCNH,HIST1H4I,ERCC3,HIST1H2AC,CBX3,POLR1B,MNAT1,POLR1A,UBTF,GTF2H3,GTF2H1,RRN3,HIST1H2BD,HIST1H2BK,MBD2,TAF1A,TAF1B,H3F3A,HIST1H3E,HIST2H3C,GTF2H4,HIST1H4J,HIST2H2BE,ERCC6,KAT2B,HIST1H2BH,HIST1H3H,PTRF,HIST1H2AE,HIST2H4A,HIST3H2BB,HIST1H3D,HIST1H2BJ,HIST1H3G,HIST2H2AC,HIST1H4H,HIST4H4,HIST1H2BN,HIST1H4K,HIST1H2BG,HIST1H2B…
REACTOME_MEIOTIC_RECOMBINATION	-0.75555	-1.76001	0	1000000000	86	72	H2AFX,CDK4,H2AFZ,RPA3,SPO11,MND1,RAD51,RPA2,RAD51C,HIST1H4I,HIST1H2AC,MSH5,MLH1,CDK2,RPA1,BRCA1,HIST1H2BD,BLM,HIST1H2BK,MLH3,TOP3A,RAD50,H3F3A,HIST1H3E,HIST2H3C,NBN,HIST1H4J,HIST2H2BE,BRCA2,DMC1,ATM,HIST1H2BH,HIST1H3H,HIST1H2AE,HIST3H3,HIST2H4A,HIST3H2BB,HIST1H3D,HIST1H2BJ,HIST1H3G,HIST2H2AC,HIST1H4H,HIST4H4,HIST1H2BN,HIST1H4K,HIST1H2BG,HIST1H2BC,MSH4,HIST1H2AD,HIST1H2BE,HIST2H3D,HIST1H4F,HIST1H2…
ES, enrichment score; NES, normalized enrichment score; FDR, false discovery rate
